## **Developmental effects of oxytocin neurons on social affiliation and processing of social information**

Ana Rita Nunes<sup>1,2,\*</sup>, Michael Glikberg<sup>2,\*</sup>, Susana A.M. Varela<sup>1,3</sup>, Magda Teles<sup>1</sup>, Einav Wircer<sup>2</sup>, Janna Blechman<sup>2</sup>, Giovanni Petri<sup>4</sup>, Gil Levkowitz<sup>2,#</sup>, Rui F. Oliveira<sup>1,3,5,#</sup>

\* These authors contributed equally to the work

Integrative Behavioural Biology Lab<sup>1</sup>, Instituto Gulbenkian de Ciência, Oeiras 2780-156, Portugal.

Department of Molecular Cell Biology<sup>2</sup>, Weizmann Institute of Science, Rehovot 7610001, Israel.

ISPA- Instituto Universitário<sup>3</sup>, Lisboa 1149-041, Portugal

ISI Foundation & ISI Global Science Foundation<sup>4</sup>, 10126 Torino, Italy

Champalimaud Research<sup>5</sup>, Champalimaud Centre for the Unknown, 1400-038 Lisbon, Portugal.

# Correspondence should be addressed to

G.L. [gil.levkowitz@weizmann.ac.il](mailto:gil.levkowitz@weizmann.ac.il)

R.F.O. [ruiol@ispa.pt](mailto:ruiol@ispa.pt)

### **KEYWORDS**

Sociality, oxytocin, dopamine, zebrafish, development, organizational hypothesis, social decision making network

## 1 **Summary**

2 Hormones regulate behavior either through activational effects that facilitate the acute  
3 expression of specific behaviors or through organizational effects that shape the  
4 development of the nervous system thereby altering adult behavior [1,2]. The  
5 neurohormone oxytocin (OXT) has an activational role in several aspects of social  
6 behavior [3], including social processing [4,5], attention [6,7] and reward [8], in rodents  
7 and humans. Previously, we showed that this activational role of OXT is evolutionarily  
8 conserved in deep time, since OXT also modulates perception of visual social cues [9]  
9 and social recognition [10,11] in zebrafish. In contrast, the organizational action of OXT  
10 neurons in maturation of distinct neural systems necessary for social behavior remains  
11 less explored. Here, we show that in zebrafish, OXT is required during early life for the  
12 display of social affiliation in adulthood. Perturbation of OXT neurons during early  
13 development led to a loss of dopaminergic neurons, associated with visual processing  
14 and reward, and altered the neuronal response to social stimuli in the preoptic area and  
15 the ventral telencephalon of the adult brain. Ultimately, adult fish which were ablated in  
16 early life, displayed altered functional connectivity within social decision-making brain  
17 nuclei both in naïve state and in response to social stimulus and became less social. We  
18 propose that OXT neurons have an organizational role, namely to shape forebrain  
19 neuroarchitecture during development and to acquire an affiliative response towards  
20 conspecifics.

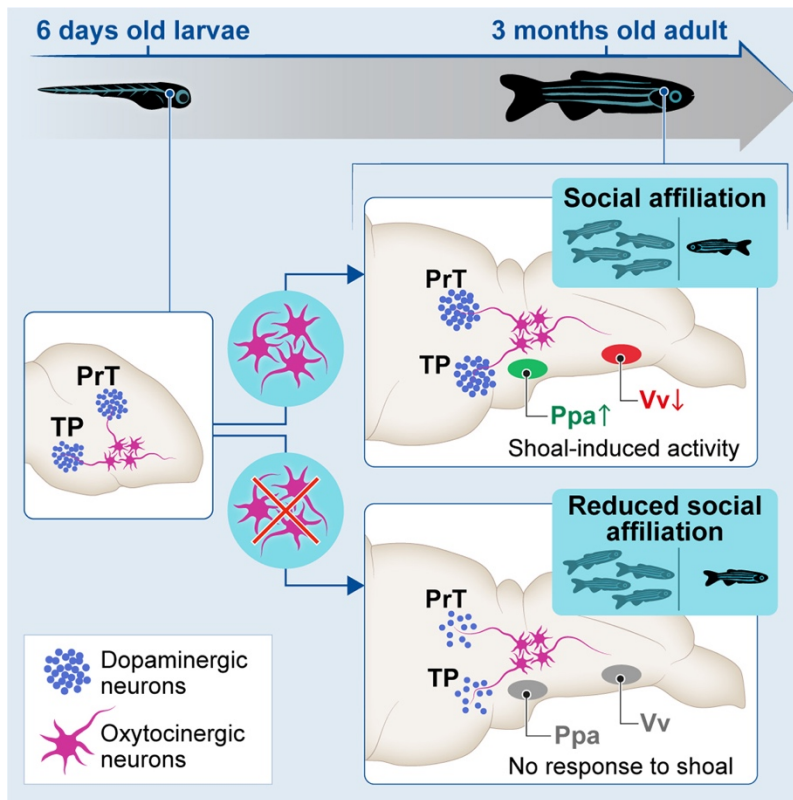

### In brief:

Social behavior is developed over the lifetime of an organism, beginning at early developmental stages. We show that proper behavioral and neural response to social stimuli depend on a developmental process orchestrated by oxytocin neurons that are also necessary for development of dopaminergic neurons in visual processing (PrT) and reward (TP) centers.

### Highlights:

- Ablation of oxytocinergic neurons during early development reduces social affiliation
- Ablated oxytocinergic neurons recover but their developmental perturbation leads to irreversible reduction in dopaminergic cell number.
- Early-life perturbation of oxytocinergic neurons blunts neuronal response to social stimulus in adulthood
- Modular structure of functional connectivity of social decision-making network changes as a result of early life OXT ablation

## 20 RESULTS

### 21 Early life ablation of oxytocinergic neurons decreases social affiliation

22 Zebrafish is a highly gregarious species exhibiting well-characterized social behaviors  
23 (reviewed in [12]). We quantified the visually-mediated motivation of zebrafish to  
24 approach conspecifics, as an indicator of social affiliation, by performing a two-choice  
25 preference test measuring the time that individuals spend either near a compartment  
26 containing a shoal of conspecifics or an empty one [10,11]. When an adult zebrafish is  
27 visually presented with both shoal and non-shoal compartments, in a side-by-side  
28 configuration, it will spend most of the time in association with the shoal; however, if shoal  
29 is not visible, fish tend to explore the entire arena (Figure1 A,B). In accordance with  
30 previous reports [13,14], we found social affiliation is an acquired developmental trait that  
31 emerges after the third week of life. This was observed both in zebrafish that were  
32 repeatedly exposed to the social affiliation behavioral arena throughout development (12  
33 days-old (d): $p=0.34$ ,  $n=16$ ; 19d:  $p=0.48$ ,  $n=18$ ; 21d:  $p=0.85$ ,  $n=6$ ; 26d:  $p=0.76$ ,  $n=10$ ; 36d:  
34  $p=0.0007$ ,  $n=13$ ; 90d:  $p<0.0001$ ,  $n=24$ ; one sample t-test vs. theoretical score of 0.5  
35 indicating no preference, Figure 1C), and in zebrafish that were only exposed to the arena  
36 once at a specific developmental time point to avoid habituation to the setup (12d:  $p=$   
37  $0.69$ ,  $n=15$ ; 14d:  $p=0.91$ ,  $n=14$ ; 16d:  $p=0.73$ ,  $n=15$ ; 16d:  $p=0.88$ ,  $n=17$ ; 22d:  $p=0.049$ ,  
38  $n=12$ ; 24d:  $p=0.07$ ,  $n=18$ ; 26d:  $p=0.01$ ,  $n=17$ ; 28d:  $p=0.057$ ,  $n=13$ ; 30d:  $p=0.17$ ,  $n=8$ ; 33d:  
39  $p<0.0001$ ,  $n=14$ ; 62d:  $p=0.002$ ,  $n=10$ ; one sample t-test vs. theoretical score of 0.5  
40 indicating no preference, Figure 1C).

41 Oxytocin (OXT) has long been known to regulate social behaviors across species [15]  
42 and it has been linked to neurodevelopmental disorders that impact social behavior during  
43 development and adulthood [16,17]. This makes OXT a good candidate system for  
44 investigating neurodevelopmental processes linked to social development. To  
45 disentangle the organizational vs. activational effects of OXT neurons in the acquisition  
46 of adult social affiliation, we used a transgenic line, *Tg(oxt:Gal4;UAS:NTR-mCherry)*, to  
47 express nitroreductase (NTR) protein fused to the mCherry reporter, in oxytocin neurons  
48 (Figure1D,E). In the presence of the drug metronidazole (MTZ), NTR produces cytotoxic  
49 metabolites, thereby allowing temporally controlled ablation of OXT neurons at different

50 developmental stages [18,19]. We confirmed the expression of the NTR-mcherry fusion  
51 protein in the OXT-ergic neuronal population by co-localizing the *Tg(oxt:Gal4;UAS:NTR-*  
52 *mCherry)* with a transgenic reporter *Tg(oxt:EGFP)* at different stages of development (8,  
53 14, 24 and 90 days-old, Figure 1E).

54 In both mammals and fish, OXT is produced by specific cells in the preoptic  
55 hypothalamus which can be classified as magnocellular or parvocellular, based on soma  
56 size [20,21]. We and others have previously shown that zebrafish magnocellular OXT  
57 cells are clustered in the anterior-dorsal portion of the cell group, whereas the  
58 parvocellular neurons make up the more ventral part of the group [22,23]. We observed  
59 that the NTR-mCherry protein was prominently expressed in the most anterior-dorsal part  
60 of the preoptic area (Figure 1E), thus it can be considered to localize mainly to  
61 magnocellular OXT neurons in both larvae and adult zebrafish. MTZ treatment at all time  
62 points was highly effective (>80% decrease) at ablating NTR-mCherry-positive OXT  
63 neurons (Figure S1A,B, related to Figure 2). To ensure proper ablation of endogenous  
64 OXT-ergic cells following MTZ treatment, we also performed fluorescent *in situ*  
65 hybridization with probes directed against *oxt* mRNA at 4-6 days-old, 12-14 days-old, and  
66 in the adult (Figure 2A-C). A significant decrease in OXT-expressing cells was observed  
67 following MTZ treatment at all tested ages ( $p=0.0024$   $n=11/10$ ,  $p=0.0003$   $n=7/7$ ,  
68  $p=0.0079$   $n=5/4$ , for 4-6 days-old, 12-14 days-old, and adult ablation untreated/treated,  
69 respectively, one tailed Mann-Whitney test, Figure 2A'-C').

70 To assess the effects of temporal OXT neuronal ablation on adult social affiliation,  
71 zebrafish were treated with MTZ at specific time-points during development (4-6, 12-14,  
72 22-24 days-old) or post-puberty (90 days-old) and social affiliation was assessed in  
73 adulthood in comparison to untreated siblings (Figure 2D). We analyzed the social  
74 affiliation scores of eight independent cohorts in which OXT neurons were ablated at 4-6  
75 days days-old and found that despite considerable variation among cohorts during the  
76 test, there was a robust effect of MTZ treatment on adult social affiliation (cohorts:  $p=$   
77  $0.0081$ ; treatment:  $p=0.001$ , see Methods section for detailed statistics of the Generalized  
78 Linear Model (GLM) with beta regression, Table S1, Figure S2A). MTZ treatment did not  
79 affect overall fish locomotion as measured by the total distance traveled during the trial

80 (cohorts:  $p=8.342e-16$ , treatment:  $p=0.668$ , Linear Model (LM), Table S1, Figure S2B).  
81 We also observed variation among control adult cohorts not expressing NTR but treated  
82 or untreated with MTZ at 4-6 days-old, without a main effect of MTZ-treatment on either  
83 social affiliation score (cohort:  $p=0.0001$ , MTZ-treatment:  $p=0.2653$ , GLM with beta  
84 regression, Table S2, Figure S2C) or total distance moved (cohort:  $p<2e-16$ , MTZ-  
85 treatment:  $p=0.1536$ , LM, Table S2, Figure S2D).

86 In view of the biological variability observed across cohorts, we further verified the  
87 effect of early-life OXT-neuron ablation on social affiliation by utilizing a Monte Carlo (MC)  
88 simulation where we randomly sampled 15 treated and 15 untreated 4-6 days-old larvae  
89 from all 8 cohorts and repeated the procedure for 1000 iterations. This analysis also  
90 clearly indicated an impairment of adult social affiliation ( $p<0.0001$ , one-tailed Mann-  
91 Whitney test, Figure 2E, see Statistics for details on MC), which was maintained in 12-14  
92 days-old MTZ-treated adult fish ( $p=0.034$ ,  $n=14/14$ , one-tailed Mann-Whitney test, Figure  
93 2E).

94 In contrast to the deficit in social affiliation caused by early life MTZ treatment, ablation  
95 of OXT neurons in either 22-24 days-old juveniles or 90+ days-old adults did not affect  
96 adult social affiliation (22-24:  $p=0.1364$ ,  $n=10/9$  one-tailed Mann-Whitney test; Adults:  
97  $p=0.3566$ ,  $n=6/7$ , one-tailed Mann-Whitney test, Figure 2E). This result coincides with the  
98 observation that social affiliation is a developmentally acquired trait which is established  
99 before the juvenile stage of development (Figure 1C and [14]).

100 Taken together, these results show that early developmental, but not adult, ablation of  
101 OXT neurons leads to a long-term deficit in social affiliation in adulthood, suggesting that  
102 OXT neurons are involved in an early-life developmental process that is required for  
103 proper social affiliation later in life.

#### 104 **Early life OXT ablation leads to impairments in specific dopaminergic clusters**

105 Notably, although early-life OXT neuronal ablation induced an impairment in social  
106 affiliation, we observed complete recovery of the OXT neural population by adulthood, as  
107 ablated fish displayed normal counts of OXT-expressing NTR-mCherry transgene (4-6

108 days-old MTZ-treated (n=14) vs. untreated (n=15) adult zebrafish:  $p=0.33$ , unpaired t-  
109 test, Figure 2F-H). This is in line with previous work showing that zebrafish neurons are  
110 capable of regenerating following lesions even in adulthood [24]. Conversely, animals in  
111 which OXT neurons were ablated in adulthood displayed normal social drive (Figure 2E)  
112 despite the fact that the ablated cell populations had not yet recovered by the time of the  
113 behavioral testing (Figure 2C, S1).

114 We therefore hypothesized that the developmental organization of other neuronal  
115 systems that regulate social affiliation might have been affected by early OXT ablation.  
116 Dopamine (DA) is mainly involved in reward and reinforcement systems [25,26], but also  
117 in sensory modulation and attention gating [25,27]. DA neurons are activated during  
118 social interactions and mating, and interact with the OXT system to promote pair-bond  
119 formation [26,28] and sociability [29], suggesting that OXT and dopamine are both  
120 necessary to promote the sensory and rewarding aspects of social interactions.  
121 Therefore, we examined whether early perturbation of the OXT neuronal system affected  
122 specific tyrosine hydroxylase (TH)- positive DA-ergic neuronal clusters, which in zebrafish  
123 are anatomically discernible from other TH-positive catecholaminergic cells [30,31], and  
124 whether these effects persist over the long term. We observed that already 24 hours after  
125 ablation of OXT neurons at 4-6 days-old, there was a significant decrease in  
126 dopaminergic neuronal counts in the pretectum (PrT;  $p=0.009$ ,  $n=18/18$ , LM, Figure 3A,  
127 Table S3), and the large neurons of the posterior tuberculum (TP;  $p=0.0045$ ,  $n=18/18$ ,  
128 LM, Figure 3A, Table S3). In contrast, no differences were found in telencephalic DA  
129 neurons of the ventral subpallium area (Table S3). The pretectum is the teleostean  
130 homologue of the superior colliculus, an area known to be involved in gaze control and  
131 possibly attention in zebrafish [32] as well as in mammals [33]. The posterior tuberculum  
132 is the source of the ascending DA system, which is considered analogous to the  
133 mammalian ventral tegmental area (VTA) [30], which is involved in reward and  
134 reinforcement [34].

135 Unlike the ablated OXT cells, which recovered over time, the deficits in DA neurons  
136 observed in early OXT-ablated larvae persisted through adulthood, as adult fish that had  
137 been treated with MTZ between 4-6 days-old displayed a reduced number of TH-positive

138 DA cells in the PrT ( $p=0.005$ ,  $n=7/7$ ; Figure 3B, GLMM). Similarly, OXT ablation caused  
139 a decrease in the DA-ergic neurons residing in two subdivisions of the TP, the  
140 periventricular nucleus of the posterior tuberculum (TPp) and the posterior tuberal  
141 nucleus (PTN), which are distinguishable only in the adult (TPp  $p=0.025$ ,  $n=7/7$ ; PTN  $p=$   
142  $0.005$ ,  $n=7/7$ ; Figure 3B, GLMM). (GLMMs with Poisson regression, planned comparisons  
143 and *fdr* corrections, Figure S3 and Table S3).

144 To demonstrate that at the time of their ablation, OXT neurons physically interact with  
145 the affected DA neurons, we examined whether OXT neurons form synapses on DA-ergic  
146 clusters of the PrT and TP. We employed a double transgenic line,  
147 *Tg(oxt:Gal4;UAS:Syph-EGFP)*, which genetically expresses the synaptic marker,  
148 synaptophysin-GFP in OXT neurons [35], and visualized synaptic contacts onto TH  
149 positive DA-ergic neurons (Figure 3C,D). To ensure that these are indeed bona-fide OXT  
150 releasing synapses, we also co-stained these fish with an anti-OXT antibody [35,36]  
151 (Figure 3D-F). We found OXT projections forming multiple synapses onto the DA neurons  
152 of the PrT and the TP (Figure 3D-F). We also observed OXT cells directly abutting the  
153 TH-positive cells of the TP (Figure 3F), raising the possibility that OXT affects nearby DA-  
154 ergic cells in a non-synaptic manner as has been shown in other species [37,38]. These  
155 results indicate that these two systems, DA and OXT, are already linked at early  
156 developmental stages and that early ablation of OXT neurons irreversibly impairs the  
157 development of subsets of DA neurons which are key for social affiliation later in life.

## 158 **Early-life ablation of oxytocinergic neurons leads to impaired social information** 159 **processing**

160 In view of these results, we next examined whether these long-lasting developmental  
161 changes also manifested in the neural processing response to social stimuli in adults,  
162 focusing on vertebrate social decision-making network and mesolimbic reward system  
163 [39]. To this end, early-life ablated (MTZ-treated at 4-6 days-old) adult zebrafish were  
164 exposed to a single visual social stimulus for 10 minutes (a shoal of conspecifics  
165 comprised of 2 females and 2 males or an empty tank for controls) and their forebrain  
166 neuronal activity state was analyzed by immunostaining of phosphorylated ribosomal



167 protein S6 (pS6), a known correlate for neuronal activation ([40], Figure 4A). We then  
168 quantified the number of pS6-positive neurons in several specific brain areas known to  
169 be implicated in neural processing of social information and social reward [39] (Figures  
170 4B-E and S5). Results showed that early OXT ablation significantly affected neuronal  
171 activity in response to social stimulus in two specific areas: the anterior part of the  
172 parvocellular preoptic nucleus (Ppa) and in the most anterior part of the ventral nucleus  
173 of ventral telencephalon (Vv) (GLMM with Poisson regression, planned comparisons and  
174 false discovery rate (fdr) corrections, Table S5).

175 Specifically, we found that while unablated fish exhibited increased activity in the Ppa  
176 upon exposure to a shoal of conspecifics, this was not observed in early ablated fish  
177 (untreated shoal vs untreated empty,  $p=0.024$ ,  $n=11/7$  respectively; MTZ-treated shoal  
178 vs MTZ-treated empty,  $p=0.88$ ,  $n=10/6$  respectively; Figure 4B,C, Table S5). Conversely,  
179 Vv neurons of unablated fish exhibited decreased activity upon exposure to a social  
180 stimulus, whereas early ablated animals maintained their neuronal activity regardless of  
181 the stimulus (untreated shoal vs untreated empty,  $p=0.024$ ,  $n=11/7$  respectively; MTZ-  
182 treated shoal vs MTZ-treated empty,  $p=0.88$ ,  $n=11/7$  respectively; Figure 4 D,E; Table  
183 S5).

184 These results show that these two brain areas display deficits in neuronal response to  
185 a social stimulus in early OXT-ablated zebrafish. Importantly, the Vv is considered  
186 analogous to the mammalian lateral septum (LS), while the Ppa is analogous to the  
187 mammalian preoptic hypothalamus (POA) [39,41]. These areas are core nodes of the  
188 social behavior network in all vertebrate species and have a strong reciprocal connection  
189 with each other [39,41].

190 We next examined whether early-life ablation of OXT neurons in the POA altered  
191 functional connectivity between forebrain nuclei belonging to the social decision-making  
192 network (SDMN; [42]), by comparing the correlation matrices of activity levels for the  
193 different areas between ablated and non-ablated fish in either basal state or in response  
194 to social stimulus. We constructed correlation matrices corresponding to each treatment  
195 via a resampling scheme, inspired by Quadratic Assignment Procedure [43], that

196 additionally allows to choose the threshold for sparsification on the basis of minimal  
197 heterogeneity across resampled correlation matrices (see Methods). To identify  
198 functional reconfigurations between different treatments, we identified mesoscale  
199 differences in the way the functional networks are organized by their modular (or  
200 community) structure. To extract such modules, we performed community detection using  
201 the Leiden algorithm [44] on the functional connectivity matrix of each treatment. To  
202 ensure the robustness of the resulting partitions, we repeated the optimization 400 times  
203 per treatment and reconciled the different candidate partitions by considering the central  
204 partition [45] (see final partitions in Figure 4F). Already by visual inspection it is possible  
205 to observe differences in the overall community structure between treatments in the  
206 allocation of nodes to communities, and in the relative integration within and across  
207 communities. We quantified such integration by calculating the ratio  $r$  of the total edge  
208 weights within communities to the total edge weights between different communities (see  
209 Methods). We found that in the basal state (i.e. when no visual stimulus was presented)  
210 the mesoscale functional organization is different between ablated ( $r = 4.6$ ) and non-  
211 ablated fish ( $r = 7.5$ ), implying that the ablation of OXT neurons in the POA modifies the  
212 resting state networks of the forebrain SDM. In particular, ablated fish show a much less  
213 segregated network with respect to non-ablated ones. Secondly, we observed that, in  
214 response to the social stimulus (i.e. sight of a conspecific shoal), the functional network  
215 of non-ablated fish transitions from a segregated state ( $r = 7.5$ ) to a more integrated one  
216 ( $r = 3.7$ ), whereas ablated fish showed the opposite pattern, moving from a more  
217 integrated basal state ( $r = 4.6$ ) to a more segregated response network ( $r = 6.4$ ). All  $r$   
218 values are significantly different from zero, and also significantly different from each other  
219 ( $p < 0.01$ ). Finally, we completed the network analysis focusing on local differences in  
220 terms of network centralities. In particular, we looked at the strength of nodes,  
221 representing how strongly a node is connected to its neighbors (Table S.6). We found a  
222 strong and significant anti-correlation between the ranking of strengths for the ablated  
223 versus non-ablated fish in response to the social stimulus (Untreated Shoal vs MTZ-  
224 treated Shoal, Spearman  $r = -0.5$ ,  $p = 0.01$ ), implying that the hub nodes for non-ablated fish  
225 are poorly connected nodes for the ablated and vice versa. Specifically, in untreated fish  
226 exposed to the social stimulus, the most connected nodes were the postero-ventral part

227 of the ventral telencephalon (Vv<sub>p</sub>), followed by the medial zone of the dorsal telencephalic  
228 area (Dm), two regions that have been implicated in the regulation of social interactions  
229 and motivated behavior in zebrafish [46,47]. In contrast, both these nodes drop their  
230 centrality in the SDMN network of MTZ-treated fish exposed to the social stimulus (from  
231 1<sup>st</sup> to 5<sup>th</sup> and from 2<sup>nd</sup> to 16<sup>th</sup>, among 16 nodes, respectively), where the antero- dorsal  
232 part of the ventral telencephalon (Vd<sub>a</sub>) and the lateral part of the ventral telencephalon  
233 (VI), two poorly connected nodes in untreated fish (ranking 14<sup>th</sup> and 16<sup>th</sup>, out of 16 nodes,  
234 respectively), were the most connected nodes (Table S6).

235 These results indicate that early-life OXT ablation leads to blunted response to shoal-  
236 induced changes in brain activity within specific nuclei (Vv and Ppa), and to a wide-  
237 ranging alteration in network connectivity spanning several nuclei of the social decision-  
238 making network in both basal state and in response to social stimulus.

239 Taken together, our results show that proper response to social stimuli depends on  
240 orchestrated co-development of OXT and DA neurons. We show that during  
241 development, OXT has important organizational effects. Early developmental  
242 perturbation of OXT neurons led to reduced attraction towards conspecifics, impaired the  
243 neurodevelopment of specific DA-ergic neurons, caused a blunted neural response to  
244 social stimuli in the forebrain (Ppa and Vv), and altered the connectivity of the SDMN.

## 245 **DISCUSSION**

246 Previous research has implicated OXT in various developmental disorders that affect  
247 social function in humans, have highlighted its importance in social behavior in animals,  
248 and indicated the importance of its communication with other systems, such as DA,  
249 serotonin and estrogen for proper social behavior [5,16,27,48,49]. However, there has  
250 been limited investigation into the mechanistic aspects of OXTs developmental functions,  
251 and how they are linked to its well-described social roles.

252 Here we utilize temporally controlled perturbations of OXT-ergic cells at different  
253 developmental timepoints during zebrafish life to show that OXT has a distinct  
254 developmental function, namely to enable proper development of specific downstream

255 DA-ergic clusters known to be involved in visual attention gating and reward [32,39]. We  
256 also show that in animals where this developmental process was perturbed, the response  
257 to social stimuli is affected, and social motivation is reduced.

258 The developmentally affected DA-ergic clusters, namely the pretectum/superior  
259 colliculus and the Tpp/VTA have been linked in other organisms to social functioning at  
260 the level of behavior and, at the molecular level, to the OXT system. Thus, in primates  
261 and humans, which like zebrafish are highly dependent on vision for gathering social  
262 information, OXT receptors are expressed in the superior colliculus [50–53], and OXT  
263 modulates the gaze and oculomotor responses controlled by this nucleus [54,55]. This is  
264 also true of the VTA, where OXT receptors are expressed, which functions to promote  
265 sociability [29]. Notably, rhesus monkeys subjected to early social deprivation displayed  
266 a reduction in DA neurons of the VTA [56], and mouse KO of the autism-associated gene  
267 *Nlgn3* resulted in impaired OXT signaling in DA-ergic neurons and aberrant activity in the  
268 DA-ergic neurons of the VTA [57]. This further shows how early perturbations to the OXT  
269 system can lead to wide-ranging and varied effects on other socially relevant systems in  
270 the brain. Whether the changes in DA-ergic neurons, caused the observed changes in  
271 social affiliation and neural activity has yet to be directly tested.

272 Specifically, we show that in normal fish, neurons of the Ppa respond to social stimuli  
273 by increased activity, while neurons of the Vv respond by reducing their activity. In  
274 contrast, in developmentally perturbed animals these areas do not change their activity  
275 following presentation of the stimulus. Importantly, the Vv is considered analogous to the  
276 mammalian lateral septum (LS), and the Ppa is analogous to the mammalian preoptic  
277 hypothalamus (POA) [39,41]. In zebrafish, the Vv/LS has been functionally associated  
278 with social affiliation, mainly through its cholinergic neurons [46]. However, it is interesting  
279 to note that in many animal models (e.g. rodents, teleosts, and cartilaginous fish),  
280 including zebrafish, the Vv/LS has been shown to contain mainly GABAergic neurons,  
281 and to be a source of GABAergic input to the VTA, a putative homologue of the TP,  
282 encompassing the Tpp and PTN, in zebrafish [39], as well as the POA [39,58]. Thus, it is  
283 possible that the observed reduced activity in Vv/LS corresponds to GABAergic neurons  
284 that project to the Ppa and TP. These areas are core nodes of the social behavior network

285 in all vertebrate species and have a strong reciprocal connection with each other [39,41].  
286 This suggests that social stimuli could promote a disinhibition in these target areas, which  
287 would be associated with the rewarding and/or motivational component of social  
288 affiliation. As a corollary, in early-ablated animals, where Vv activity remains high in  
289 response to social stimuli, the TP would remain inhibited, and the rewarding component  
290 of social affiliation would be attenuated, leading to decreased display of this behavior.

291 In addition, we show that the overall coactivation patterns of forebrain nuclei involved  
292 in social processing are altered in developmentally perturbed animals, both at baseline  
293 and following presentation of a social stimulus. In other words, we show that the  
294 connectivity between the different nodes of the social decision-making network changes  
295 as a result of early life OXT ablation. We submit that the proper maturation of this network  
296 at the level of neural architecture is dependent on early-life signaling by OXT neurons.

297 In summary, our results demonstrate that OXT neurons are required for the  
298 developmental acquisition of social affiliation and exert an organizational effect on other  
299 neuronal populations. Furthermore, our results suggest that this role involves  
300 orchestrating the co-development and maturation of several brain systems, such as the  
301 midbrain social visual processing and attention systems (the pretectum), social decision-  
302 making areas in the forebrain and ascending dopamine centers associated with reward.  
303 When the OXT-dependent developmental process is perturbed, neural responses to  
304 social stimuli in these regions become compromised, important parts of the social  
305 decision-making network fail to synchronize their activity, and eventually, the propensity  
306 to spend time near a shoal of conspecifics is reduced.

307

## 308 **ACKNOWLEDGMENTS**

309 We thank all members of Gil Levkowitz's and Rui Oliveira's laboratories for fruitful  
310 discussions, Nitzan Konstantin for English editing and Genia Brodsky for graphical  
311 abstract illustration. We thank the technical support of IGC's Advanced Imaging Facility  
312 (AIF-UIC), which is supported by the national Portuguese funding ref# PPBI-POCI-01-  
313 0145-FEDER-022122, co-financed by Lisboa Regional Operational Programme (Lisboa

314 2020), under the Portugal 2020 Partnership Agreement, through the European Regional  
315 Development Fund (FEDER) and Fundação para a Ciência e Tecnologia (FCT, Portugal);  
316 all the staff from the Fish Facility platforms of Instituto Gulbenkian de Ciência, Portugal,  
317 and Weizmann Institute of Science, Israel, for animal care and valuable advice;  
318 Congento, which is supported by the funding ref# LISBOA-01-0145-FEDER-022170, co-  
319 financed by Lisboa Regional Operational Programme (Lisboa 2020), under the Portugal  
320 2020 Partnership Agreement, through the European Regional Development Fund  
321 (FEDER) and Fundação para a Ciência e a Tecnologia (FCT; Portugal); IGC's  
322 Histopathology Facility for technical support, help and valuable advices; the Advanced  
323 BioImaging and BioOptics Experimental Platform (ABBE Platform) of the Champalimaud  
324 Center for the Unknown (CCU) for all the technical support and help.

325 **Funding:** ARN was supported by a Short-Term EMBO fellowship (ASTF 420-2013), by  
326 the Weizmann's Dean of Faculty postdoctoral fellowship at the Weizmann Institute, Israel,  
327 and by Fundação para a Ciência e Tecnologia (FCT; SFRH/BPD/93317/2013) at Instituto  
328 Gulbenkian de Ciência, Portugal. M.G., E.W. and J.B. were supported by Israel Science  
329 Foundation (#1511/16); United States-Israel Binational Science Foundation (#2017325);  
330 Sagol Institute for Longevity and Estate of Emile Mimran . G.L. is an incumbent of the  
331 Elias Sourasky Professorial Chair. This work was funded by the project LISBOA-01-0145-  
332 FEDER-030627 co-funded by the Programa Operacional Regional de Lisboa (Lisboa  
333 2020), through Portugal 2020 and the European Regional Development Fund (FEDER),  
334 and by the FCT/MCTES through national funds (PIDDAC).

335 **Authors contributions:**

336 ARN- Designed the research, performed experiments, analyzed data, wrote/revised  
337 manuscript; MG - Designed the research, performed experiments, analyzed data,  
338 wrote/revised manuscript; EW- Performed experiments; JB- Performed experiments; GP  
339 and MT- Performed network analysis; SAMV- Performed statistical analysis; GL-  
340 Designed the research, supervision, edited/revised manuscript; RO- Designed the  
341 research, supervision, edited/revised manuscript.

## 342 References

- 343 1. Phoenix, C.H., Goy, R.W., Geral, A.A., and Young, W.C. (1959). Organizing  
344 action of prenatally administered testosterone propionate on the tissues mediating  
345 mating behavior in the female guinea pig. *Endocrinology* 65, 369–82.
- 346 2. Adkins-Regan, E. (2012). Hormonal organization and activation: Evolutionary  
347 implications and questions. *Gen. Comp. Endocrinol.* 176, 279–285.
- 348 3. Donaldson, Z.R., and Young, L.J. (2008). Oxytocin, vasopressin, and the  
349 neurogenetics of sociality. *Science*. 322, 900–904.
- 350 4. Gamer, M., Zurowski, B., and Büchel, C. (2010). Different amygdala subregions  
351 mediate valence-related and attentional effects of oxytocin in humans. *Proc. Natl.*  
352 *Acad. Sci. U. S. A.* 107, 9400–5.
- 353 5. Grinevich, V., and Stoop, R. (2018). Interplay between Oxytocin and Sensory  
354 Systems in the Orchestration of Socio-Emotional Behaviors. *Neuron* 99, 887–904.
- 355 6. Bartz, J.A., Zaki, J., Bolger, N., and Ochsner, K.N. (2011). Social effects of  
356 oxytocin in humans: context and person matter. *Trends in Cognitive Sciences*, 15,  
357 301-309.
- 358 7. Shamay-Tsoory, S.G., and Abu-Akel, A. (2016). The Social Salience Hypothesis  
359 of Oxytocin. *Biol. Psychiatry* 79, 194–202.
- 360 8. Insel, T.R., and Shapiro, L.E. (1992). Oxytocin receptor distribution reflects social  
361 organization in monogamous and polygamous voles. *Proc. Natl. Acad. Sci. U. S.*  
362 *A.* 89, 5981–5.
- 363 9. Nunes, A.R., Carreira, L., Anbalagan, S., Blechman, J., Levkowitz, G., and  
364 Oliveira, R.F. (2020). Perceptual mechanisms of social affiliation in zebrafish. *Sci.*  
365 *Rep.* 10, 1–14.
- 366 10. Ribeiro, D., Nunes, A.R., Gliksberg, M., Anbalagan, S., Levkowitz, G., and  
367 Oliveira, R.F. (2020). Oxytocin receptor signalling modulates novelty recognition  
368 but not social preference in zebrafish. *J. Neuroendocrinol.* 32, e12834.
- 369 11. Ribeiro, D., Nunes, A.R., Teles, M., Anbalagan, S., Blechman, J., Levkowitz, G.,  
370 and Oliveira, R.F. (2020). Genetic variation in the social environment affects  
371 behavioral phenotypes of oxytocin receptor mutants in zebrafish. *Elife* 9.
- 372 12. Nunes, A.R., Ruhl, N., Winberg, S., and Oliveira, R.F. (2017). Social phenotypes

- 373 in zebrafish. In *The Rights and Wrongs of Zebrafish: Behavioral Phenotyping of*  
374 *Zebrafish* (Springer International Publishing), pp. 95–130.
- 375 13. Engeszer, R.E., Barbiano, L.A. DA, Ryan, M.J., and Parichy, D.M. (2007). Timing  
376 and plasticity of shoaling behaviour in the zebrafish, *Danio rerio*. *Anim. Behav.* *74*,  
377 1269–1275.
- 378 14. Dreosti, E., Lopes, G., Kampff, A.R., and Wilson, S.W. (2015). Development of  
379 social behavior in young zebrafish. *Front. Neural Circuits* *9*, 1–9.
- 380 15. Goodson, J.L. (2008). Nonapeptides and the evolutionary patterning of sociality.  
381 *Prog. Brain Res.* *170*, 3–15.
- 382 16. Hovey, D., Zettergren, A., Jonsson, L., Melke, J., Anckarsäter, H., Lichtenstein,  
383 P., and Westberg, L. (2014). Associations between oxytocin-related genes and  
384 autistic-like traits. *Soc. Neurosci.* *9*, 378–386.
- 385 17. Pobbe, R.L.H., Pearson, B.L., Defensor, E.B., Bolivar, V.J., Young, W.S., Lee, H.-  
386 J., Blanchard, D.C., Blanchard, R.J., and Blanchard, R.J. (2012). Oxytocin  
387 receptor knockout mice display deficits in the expression of autism-related  
388 behaviors. *Horm. Behav.* *61*, 436–44.
- 389 18. Curado, S., Anderson, R.M., Jungblut, B., Mumm, J., Schroeter, E., and Stainier,  
390 D.Y.R. (2007). Conditional targeted cell ablation in zebrafish: a new tool for  
391 regeneration studies. *Dev. Dyn.* *236*, 1025–1035.
- 392 19. Curado, S., Stainier, D.Y.R., and Anderson, R.M. (2008). Nitroreductase-  
393 mediated cell/tissue ablation in zebrafish: a spatially and temporally controlled  
394 ablation method with applications in developmental and regeneration studies. *Nat.*  
395 *Protoc.* *3*, 948–954.
- 396 20. Sawchenko, P.E., and Swanson, L.W. (1982). Immunohistochemical identification  
397 of neurons in the paraventricular nucleus of the hypothalamus that project to the  
398 medulla or to the spinal cord in the rat. *J. Comp. Neurol.* *205*, 260–272.
- 399 21. Van den Dungen, H.M., Buijs, R.M., Pool, C.W., and Terlou, M. (1982). The  
400 distribution of vasotocin and isotocin in the brain of the rainbow trout. *J. Comp.*  
401 *Neurol.* *212*, 146–157.
- 402 22. Wircer, E., Blechman, J., Borodovsky, N., Tsoory, M., Nunes, A.R., Oliveira, R.F.,  
403 and Levkowitz, G. (2017). Homeodomain protein otp affects developmental



- 404 neuropeptide switching in oxytocin neurons associated with a long-term effect on  
405 social behavior. *Elife* 6: e22170.
- 406 23. Wee, C.L., Nikitchenko, M., Wang, W.C., Luks-Morgan, S.J., Song, E., Gagnon,  
407 J.A., Randlett, O., Bianco, I.H., Lacoste, A.M.B., Glushenkova, E., *et al.* (2019).  
408 Zebrafish oxytocin neurons drive nocifensive behavior via brainstem premotor  
409 targets. *Nat. Neurosci.* 22, 1477–1492.
- 410 24. Kizil, C., Kaslin, J., Kroehne, V., and Brand, M. (2012). Adult neurogenesis and  
411 brain regeneration in zebrafish. *Dev. Neurobiol.* 72, 429–61.
- 412 25. Love, T.M. (2014). Oxytocin, motivation and the role of dopamine. *Pharmacol.*  
413 *Biochem. Behav.* 119, 49–60.
- 414 26. Dölen, G., and Malenka, R.C. (2014). The Emerging Role of Nucleus Accumbens  
415 Oxytocin in Social Cognition. *Biol. Psychiatry* 76, 354–355.
- 416 27. Grinevich, V., Sophie Knobloch-Bollmann, H., Eliava, M., Busnelli, M., and Chini,  
417 B. (2015). Assembling the Puzzle: Pathways of Oxytocin Signaling in the Brain.  
418 *Biol. Psychiatry*.
- 419 28. Johnson, Z. V., Walum, H., Xiao, Y., Riefkohl, P.C., and Young, L.J. (2017).  
420 Oxytocin receptors modulate a social salience neural network in male prairie  
421 voles. *Horm. Behav.* 87, 16–24.
- 422 29. Hung, L.W., Neuner, S., Polepalli, J.S., Beier, K.T., Wright, M., Walsh, J.J., Lewis,  
423 E.M., Luo, L., Deisseroth, K., Dölen, G., *et al.* (2017). Gating of social reward by  
424 oxytocin in the ventral tegmental area. *Science.* 357, 1406–1411.
- 425 30. Rink, E., and Wullimann, M.F. (2001). The teleostean (zebrafish) dopaminergic  
426 system ascending to the subpallium (striatum) is located in the basal  
427 diencephalon (posterior tuberculum). *Brain Res.* 889, 316–330.
- 428 31. Rink, E., and Wullimann, M.F. (2002). Connections of the ventral telencephalon  
429 and tyrosine hydroxylase distribution in the zebrafish brain (*Danio rerio*) lead to  
430 identification of an ascending dopaminergic system in a teleost. In *Brain Research*  
431 *Bulletin*, pp. 385–387.
- 432 32. Antinucci, P., Folgueira, M., and Bianco, I.H. (2019). Pretectal neurons control  
433 hunting behaviour. *Elife* 8 e48114
- 434 33. Krauzlis, R.J., Liston, D., and Carello, C.D. (2004). Target selection and the

- 435 superior colliculus: Goals, choices and hypotheses. In *Vision Research*, pp.  
436 1445–1451.
- 437 34. Morales, M., and Margolis, E.B. (2017). Ventral tegmental area: Cellular  
438 heterogeneity, connectivity and behaviour. *Nat. Rev. Neurosci.* 18, 73–85.
- 439 35. Anbalagan, S., Blechman, J., Gliksberg, M., Gordon, L., Rotkopf, R., Dadosh, T.,  
440 Shimoni, E., and Levkowitz, G. (2019). Robo2 regulates synaptic oxytocin content  
441 by affecting actin dynamics. *Elife* 8: e45650.
- 442 36. Blechman, J., Anbalagan, S., Matthews, G.G., and Levkowitz, G. (2018). Genome  
443 Editing Reveals Idiosyncrasy of CNGA2 Ion Channel-Directed Antibody  
444 Immunoreactivity Toward Oxytocin. *Front. Cell Dev. Biol.* 6, 117.
- 445 37. Ludwig, M., and Leng, G. (2006). Dendritic peptide release and peptide-  
446 dependent behaviours. *Nat. Rev. Neurosci.* 7, 126–36.
- 447 38. Son, S.J., Filosa, J.A., Potapenko, E.S., Biancardi, V.C., Zheng, H., Patel, K.P.,  
448 Tobin, V.A., Ludwig, M., and Stern, J.E. (2013). Dendritic peptide release  
449 mediates interpopulation crosstalk between neurosecretory and preautonomic  
450 networks. *Neuron* 78, 1036–49.
- 451 39. O'Connell, L.A., and Hofmann, H.A. (2011). The Vertebrate mesolimbic reward  
452 system and social behavior network: A comparative synthesis. *J. Comp. Neurol.*  
453 519, 3599–3639.
- 454 40. Knight, Z.A., Tan, K., Birsoy, K., Schmidt, S., Garrison, J.L., Wysocki, R.W.,  
455 Emiliano, A., Ekstrand, M.I., and Friedman, J.M. (2012). Molecular profiling of  
456 activated neurons by phosphorylated ribosome capture. *Cell* 151, 1126–1137.
- 457 41. Wullimann, M.F., and Mueller, T. (2004). Teleostean and mammalian forebrains  
458 contrasted: Evidence from genes to behavior. *J. Comp. Neurol.* 475, 143–162.
- 459 42. O'Connell, L.A., and Hofmann, H.A. (2012). Evolution of a vertebrate social  
460 decision-making network. *Science*. 336, 1154–1157.
- 461 43. Makagon, M.M., McCowan, B., and Mench, J.A. (2012). How can social network  
462 analysis contribute to social behavior research in applied ethology? *Appl. Anim.*  
463 *Behav. Sci.* 138, 152–161.
- 464 44. Traag, V.A., Waltman, L., and van Eck, N.J. (2019). From Louvain to Leiden:  
465 guaranteeing well-connected communities. *Sci. Rep.* 9, 1–12.

- 466 45. Peixoto, T.P. (2020). Revealing consensus and dissensus between network  
467 partitions. Available at: <https://arxiv.org/abs/2005.13977v2>.
- 468 46. Stednitz, S.J., McDermott, E.M., Ncube, D., Tallafuss, A., Eisen, J.S., and  
469 Washbourne, P. (2018). Forebrain Control of Behaviorally Driven Social Orienting  
470 in Zebrafish. *Curr. Biol.* 28, 2445-2451.e3.
- 471 47. von Trotha, J.W., Vernier, P., and Bally-Cuif, L. (2014). Emotions and motivated  
472 behavior converge on an amygdala-like structure in the zebrafish. *Eur. J.*  
473 *Neurosci.* 40, 3302–3315.
- 474 48. Heinrichs, M., von Dawans, B., and Domes, G. (2009). Oxytocin, vasopressin,  
475 and human social behavior. *Front. Neuroendocrinol.* 30, 548-557
- 476 49. Rajamani, K.T., Wagner, S., Grinevich, V., and Harony-Nicolas, H. (2018).  
477 Oxytocin as a Modulator of Synaptic Plasticity: Implications for  
478 Neurodevelopmental Disorders. *Front. Synaptic Neurosci.* 10, 17.
- 479 50. Freeman, S.M., Inoue, K., Smith, A.L., Goodman, M.M., and Young, L.J. (2014).  
480 The neuroanatomical distribution of oxytocin receptor binding and mRNA in the  
481 male rhesus macaque (*Macaca mulatta*). *Psychoneuroendocrinology* 45, 128–  
482 141.
- 483 51. Freeman, S.M., Palumbo, M.C., Lawrence, R.H., Smith, A.L., Goodman, M.M.,  
484 and Bales, K.L. (2018). Effect of age and autism spectrum disorder on oxytocin  
485 receptor density in the human basal forebrain and midbrain. *Transl. Psychiatry* 8,  
486 257.
- 487 52. Freeman, S.M., Walum, H., Inoue, K., Smith, A.L., Goodman, M.M., Bales, K.L.,  
488 and Young, L.J. (2014). Neuroanatomical distribution of oxytocin and vasopressin  
489 1a receptors in the socially monogamous coppery titi monkey (*Callicebus*  
490 *cupreus*). *Neuroscience* 273, 12–23.
- 491 53. Schorscher-Petcu, A., Dupré, A., and Tribollet, E. (2009). Distribution of  
492 vasopressin and oxytocin binding sites in the brain and upper spinal cord of the  
493 common marmoset. *Neurosci. Lett.* 461, 217–222.
- 494 54. Leknes, S., Wessberg, J., Ellingsen, D.-M., Chelnokova, O., Olausson, H., and  
495 Laeng, B. (2013). Oxytocin enhances pupil dilation and sensitivity to ‘hidden’  
496 emotional expressions. *Soc. Cogn. Affect. Neurosci.* 8, 741–749.

- 497 55. Kret, M.E., and De Dreu, C.K.W. (2017). Pupil-mimicry conditions trust in  
498 partners: Moderation by oxytocin and group membership. *Proc. R. Soc. B Biol.*  
499 *Sci.* 284.
- 500 56. Martin, L.J., Spicer, D.M., Lewis, M.H., Gluck, J.P., and Cork, L.C. (1991). Social  
501 deprivation of infant rhesus monkeys alters the chemoarchitecture of the brain: I.  
502 Subcortical regions. *J. Neurosci.* 11, 3344–3358.
- 503 57. Hörnberg, H., Pérez-Garci, E., Schreiner, D., Hatstatt-Burklé, L., Magara, F.,  
504 Baudouin, S., Matter, A., Nacro, K., Pecho-Vrieseling, E., and Scheiffele, P.  
505 (2020). Rescue of oxytocin response and social behaviour in a mouse model of  
506 autism. *Nature* 584, 252–256.
- 507 58. Vega-Quiroga, I., Yarur, H.E., and Gysling, K. (2018). Lateral septum stimulation  
508 disinhibits dopaminergic neurons in the antero-ventral region of the ventral  
509 tegmental area: Role of GABA-A alpha 1 receptors. *Neuropharmacology* 128, 76–  
510 85.
- 511 59. Parker, M.O., Brock, A.J., Walton, R.T., and Brennan, C.H. (2013). The role of  
512 zebrafish (*Danio rerio*) in dissecting the genetics and neural circuits of executive  
513 function. *Front. Neural Circuits* 7, 63.
- 514 60. Panula, P., Chen, Y.C., Priyadarshini, M., Kudo, H., Semenova, S., Sundvik, M.,  
515 and Sallinen, V. (2010). The comparative neuroanatomy and neurochemistry of  
516 zebrafish CNS systems of relevance to human neuropsychiatric diseases.  
517 *Neurobiol. Dis.* 40, 46–57.
- 518 61. Anbalagan, S., Gordon, L., Blechman, J., Matsuoka, R.L., Rajamannar, P.,  
519 Wirncer, E., Biran, J., Reuveny, A., Leshkowitz, D., Stainier, D.Y.R., *et al.* (2018).  
520 Pituicyte Cues Regulate the Development of Permeable Neuro-Vascular  
521 Interfaces. *Dev. Cell* 47, 711-726.e5.
- 522 62. Davison, J.M., Akitake, C.M., Goll, M.G., Rhee, J.M., Gosse, N., Baier, H.,  
523 Halpern, M.E., Leach, S.D., and Parsons, M.J. (2007). Transactivation from Gal4-  
524 VP16 transgenic insertions for tissue-specific cell labeling and ablation in  
525 zebrafish. *Dev. Biol.* 304, 811–824.
- 526 63. Blechman, J., Amir-Zilberstein, L., Gutnick, A., Ben-Dor, S., and Levkowitz, G.  
527 (2011). The metabolic regulator PGC-1 $\alpha$  directly controls the expression of the

- 528 hypothalamic neuropeptide oxytocin. *J. Neurosci.* *31*, 14835–40.
- 529 64. Meyer, M.P., and Smith, S.J. (2006). Evidence from in vivo imaging that  
530 synaptogenesis guides the growth and branching of axonal arbors by two distinct  
531 mechanisms. *J. Neurosci.* *26*, 3604–3614.
- 532 65. Schindelin, J., Arganda-Carreras, I., Frise, E., Kaynig, V., Longair, M., Pietzsch,  
533 T., Preibisch, S., Rueden, C., Saalfeld, S., Schmid, B., *et al.* (2012). Fiji: An open-  
534 source platform for biological-image analysis. *Nat. Methods* *9*, 676–682.
- 535 66. Machluf, Y., and Levkowitz, G. (2011). Visualization of mRNA expression in the  
536 zebrafish embryo. *Methods Mol. Biol.* *714*, 83–102.
- 537 67. Lorenzi, E., Mayer, U., Rosa-Salva, O., and Vallortigara, G. (2017). Dynamic  
538 features of animate motion activate septal and preoptic areas in visually naïve  
539 chicks (*Gallus gallus*). *Neuroscience* *354*, 54–68.
- 540 68. Tay, T.L., Ronneberger, O., Ryu, S., Nitschke, R., and Driever, W. (2011).  
541 Comprehensive catecholaminergic projectome analysis reveals single-neuron  
542 integration of zebrafish ascending and descending dopaminergic systems. *Nat.*  
543 *Commun.* *2*, 171.
- 544 69. Sallinen, V., Torkko, V., Sundvik, M., Reenilä, I., Khrustalyov, D., Kaslin, J., and  
545 Panula, P. (2009). MPTP and MPP+ target specific aminergic cell populations in  
546 larval zebrafish. *J. Neurochem.* *108*, 719–731.
- 547 70. Wullimann, M.F., Rupp, B., and Reichert, H. (1996). *Neuroanatomy of the*  
548 *Zebrafish Brain* (Birkhäuser Basel). DOI [https://doi.org/10.1007/978-3-0348-8979-](https://doi.org/10.1007/978-3-0348-8979-7)  
549 *7*.
- 550 71. De Vico Fallani, F., Latora, V., and Chavez, M. (2017). A Topological Criterion for  
551 Filtering Information in Complex Brain Networks. *PLOS Comput. Biol.* *13*,  
552 e1005305.
- 553 72. R core Team (2013). R: A language and environment for statistical computing.
- 554 73. Bates, D., Mächler, M., Bolker, B.M., and Walker, S.C. (2015). Fitting linear  
555 mixed-effects models using lme4. *J. Stat. Softw.* *67*.
- 556 74. Henrik Singmann, Ben Bolker, Jake Westfall, F.A. and M.S.B.-S. (2020). afex:  
557 Analysis of Factorial Experiments. R package version 0.27-2.
- 558 75. Lenth, R. (2020). emmeans: Estimated Marginal Means, aka Least-Squares

559 Means. R package version 1.4.7.

560

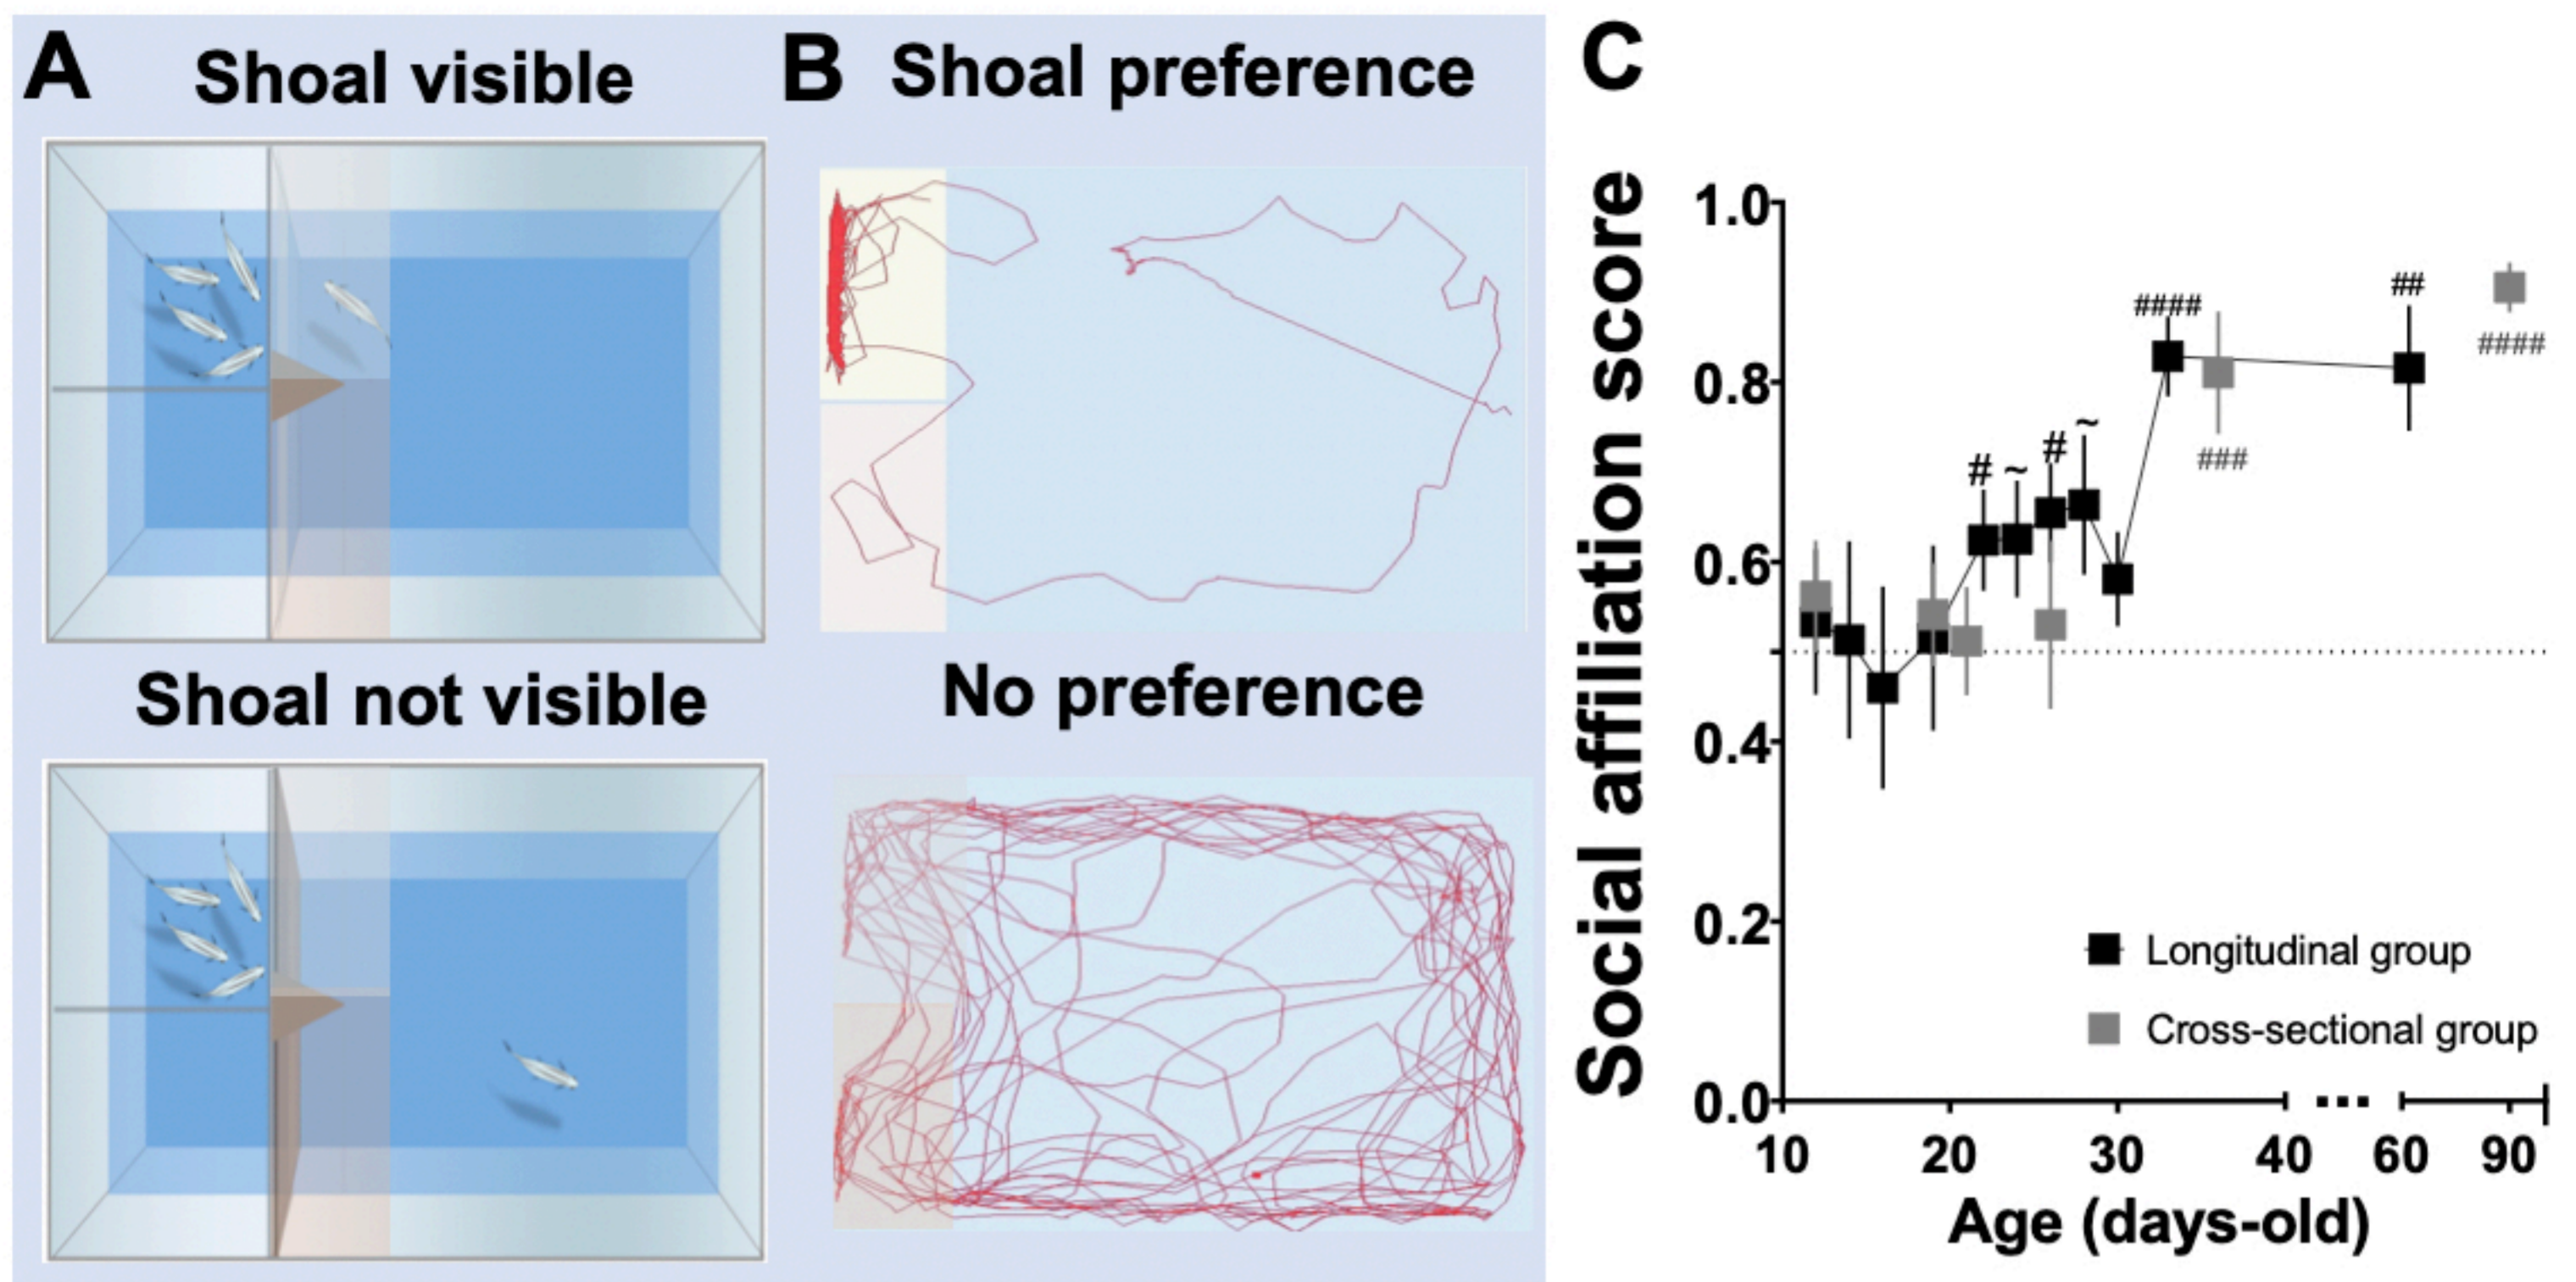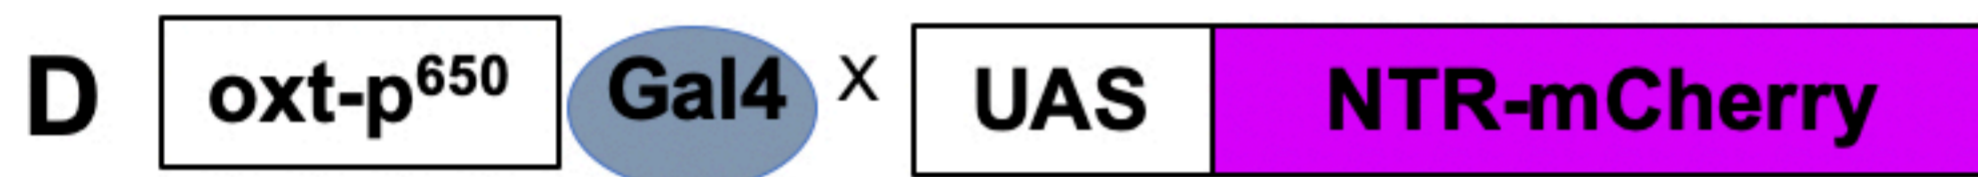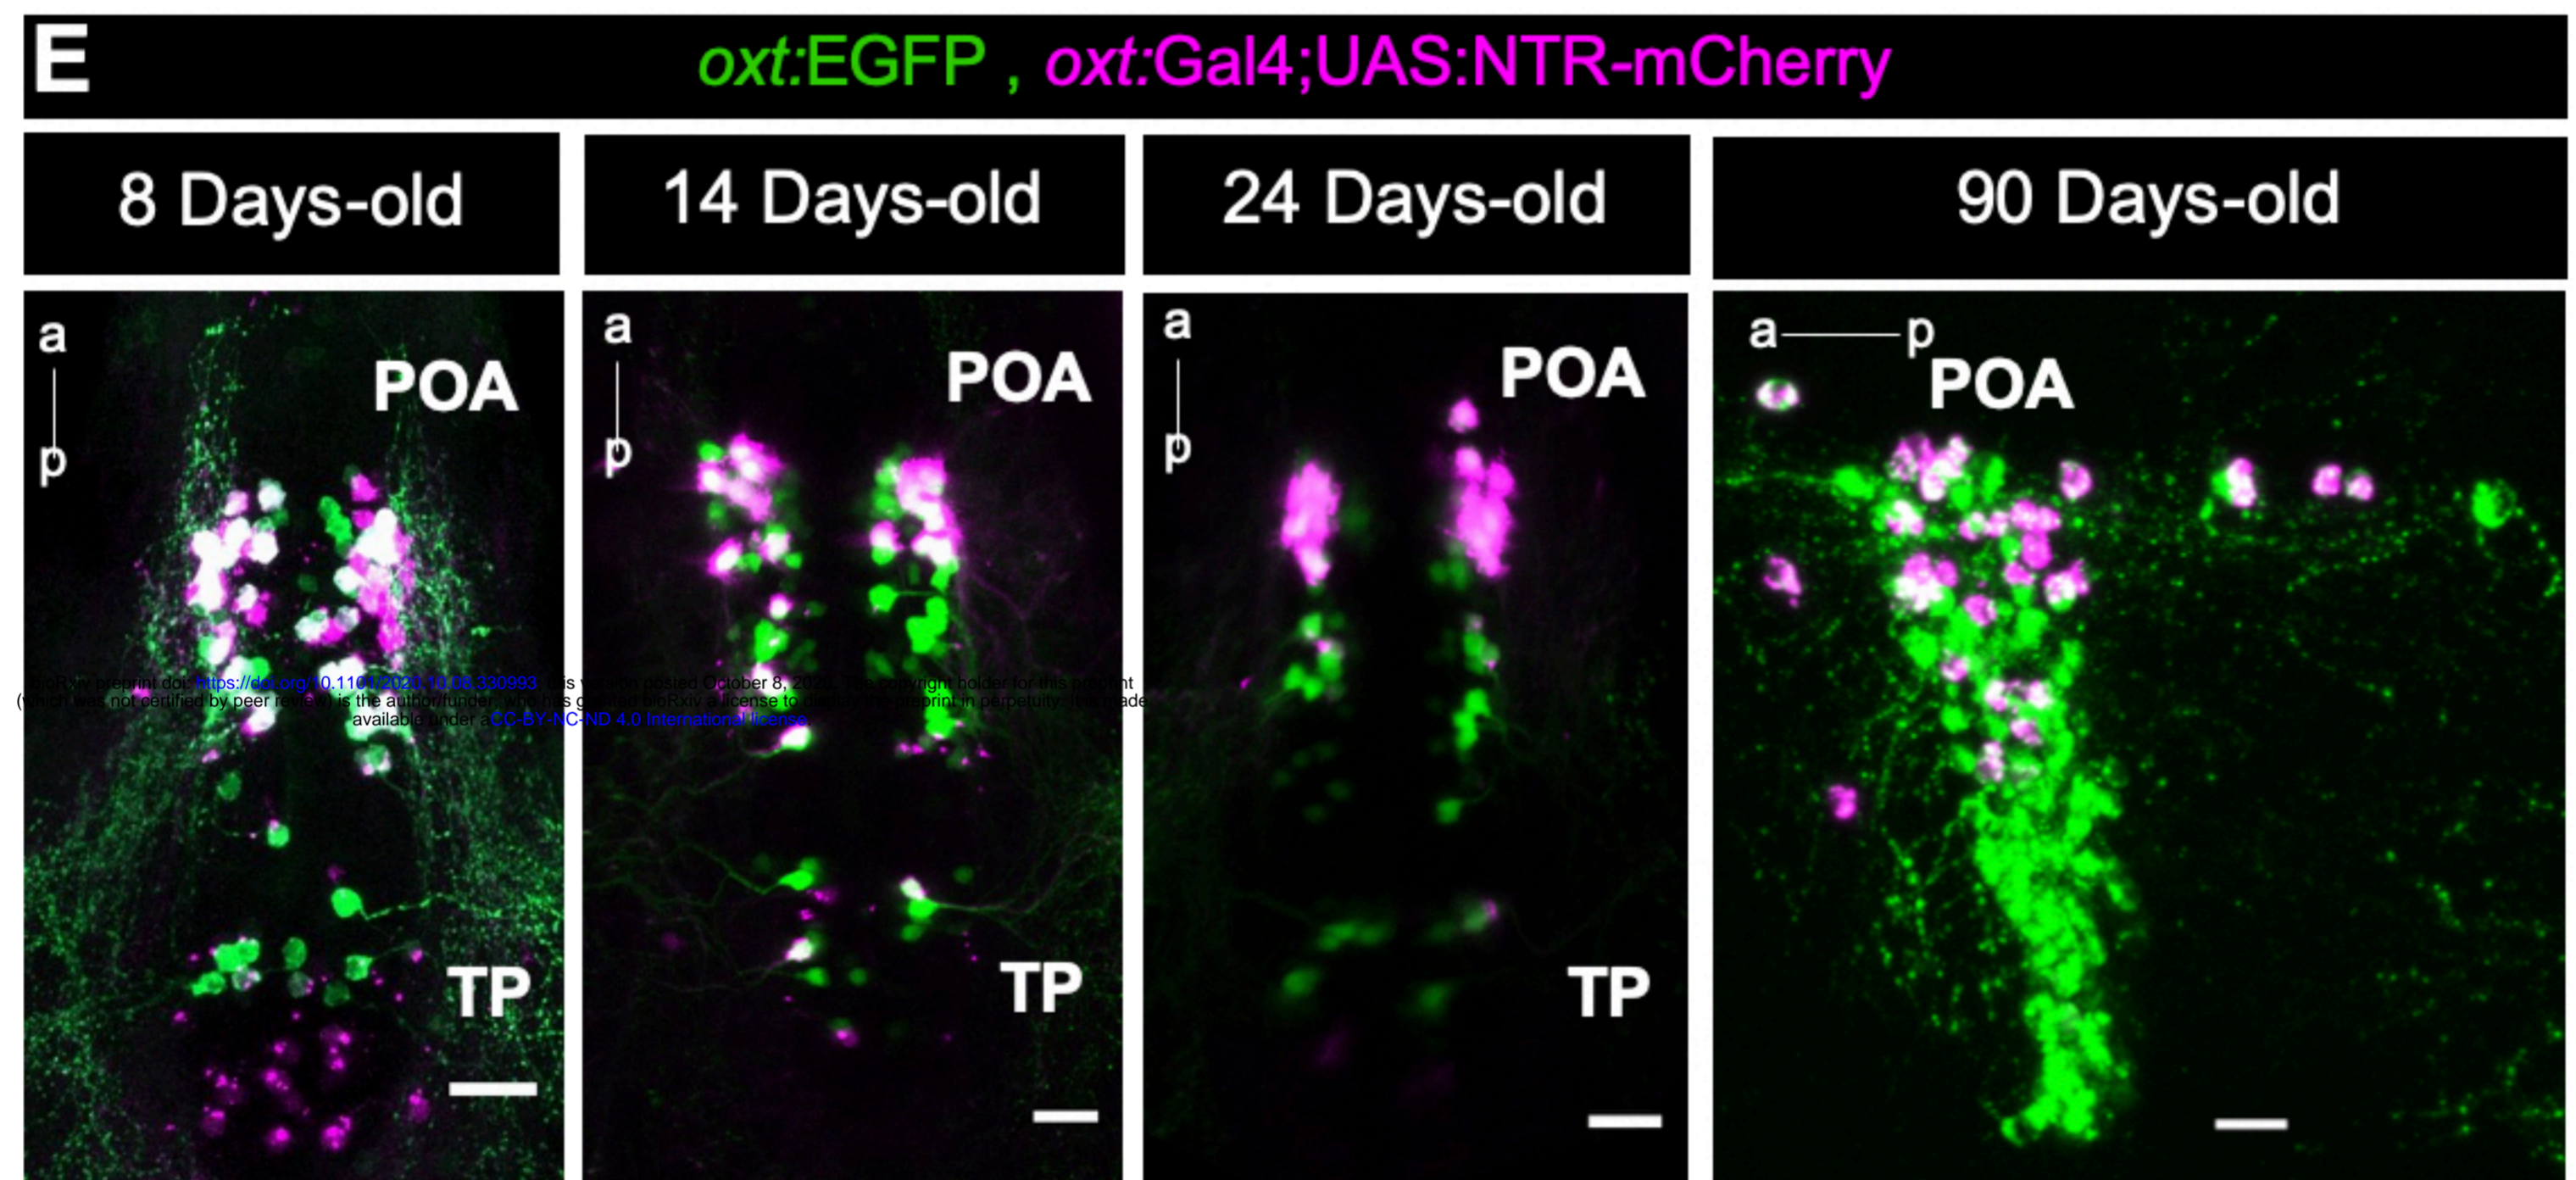

**Fig.1**

**Figure 1. Behavioral and genetic tools to study the role of oxytocinergic neurons in adult social affiliation.**

(A,B) Schematic representation of the visual-mediated shoal preference behavioral test setup. (A) When a mixed-sex shoal stimulus is visible, focal fish spends most of the time near the shoal (top). When the shoal is not visible (bottom), the focal fish explores the entire arena equally. (B) Representative tracking of the focal fish behavior. (C) Ontogeny of social affiliation in zebrafish. Visual preference to associate with a shoal of conspecific fish (social affiliation score > 0.5) emerges after the third week of life. Social affiliation score =  $\%T_{\text{shoal}} / (\%T_{\text{shoal}} + \%T_{\text{non-shoal}})$ . # Hash indicates a significant preference towards conspecifics, determined by a one-sample *t*-test with a hypothesized value of 0.5 (chance level). Fish were tested either repeatedly throughout development (black squares, longitudinal group) or only once at certain developmental time points (grey squares, cross-sectional group). (D) Spatio-temporal control of oxytocin-specific transgene expression. *oxf:Gal4* drives the expression of nitroreductase tagged with mCherry fluorescent protein (NTR-mCherry) in oxytocinergic neurons. (E) *Tg(oxf:Gal4;UAS-NTR-mCherry)* characterization: NTR-mCherry<sup>+</sup> cells co-localized with a subpopulation of *oxf:eGFP* neurons, at all developmental stages studied (8, 14 and 24 days-old: whole-mount larvae confocal z-stack image, dorsal view, anterior to top; 90 days-old, close-up of the preoptic area (POA), sagittal brain slice, confocal z-stack image, anterior to left). Scale: 20 μm. (F) Percentage of co-localization of *oxf:NTR-mCherry*<sup>+</sup> and *oxf:eGFP*<sup>+</sup> neuronal population. Data presented as mean ± SEM.

\*\*p<0.01, ~ p<0.1; # p<0.05, ## p<0.01, ### p<0.001, #### p<0.0001 (black # relates to the longitudinal group, grey # relates to the cross-sectional group).



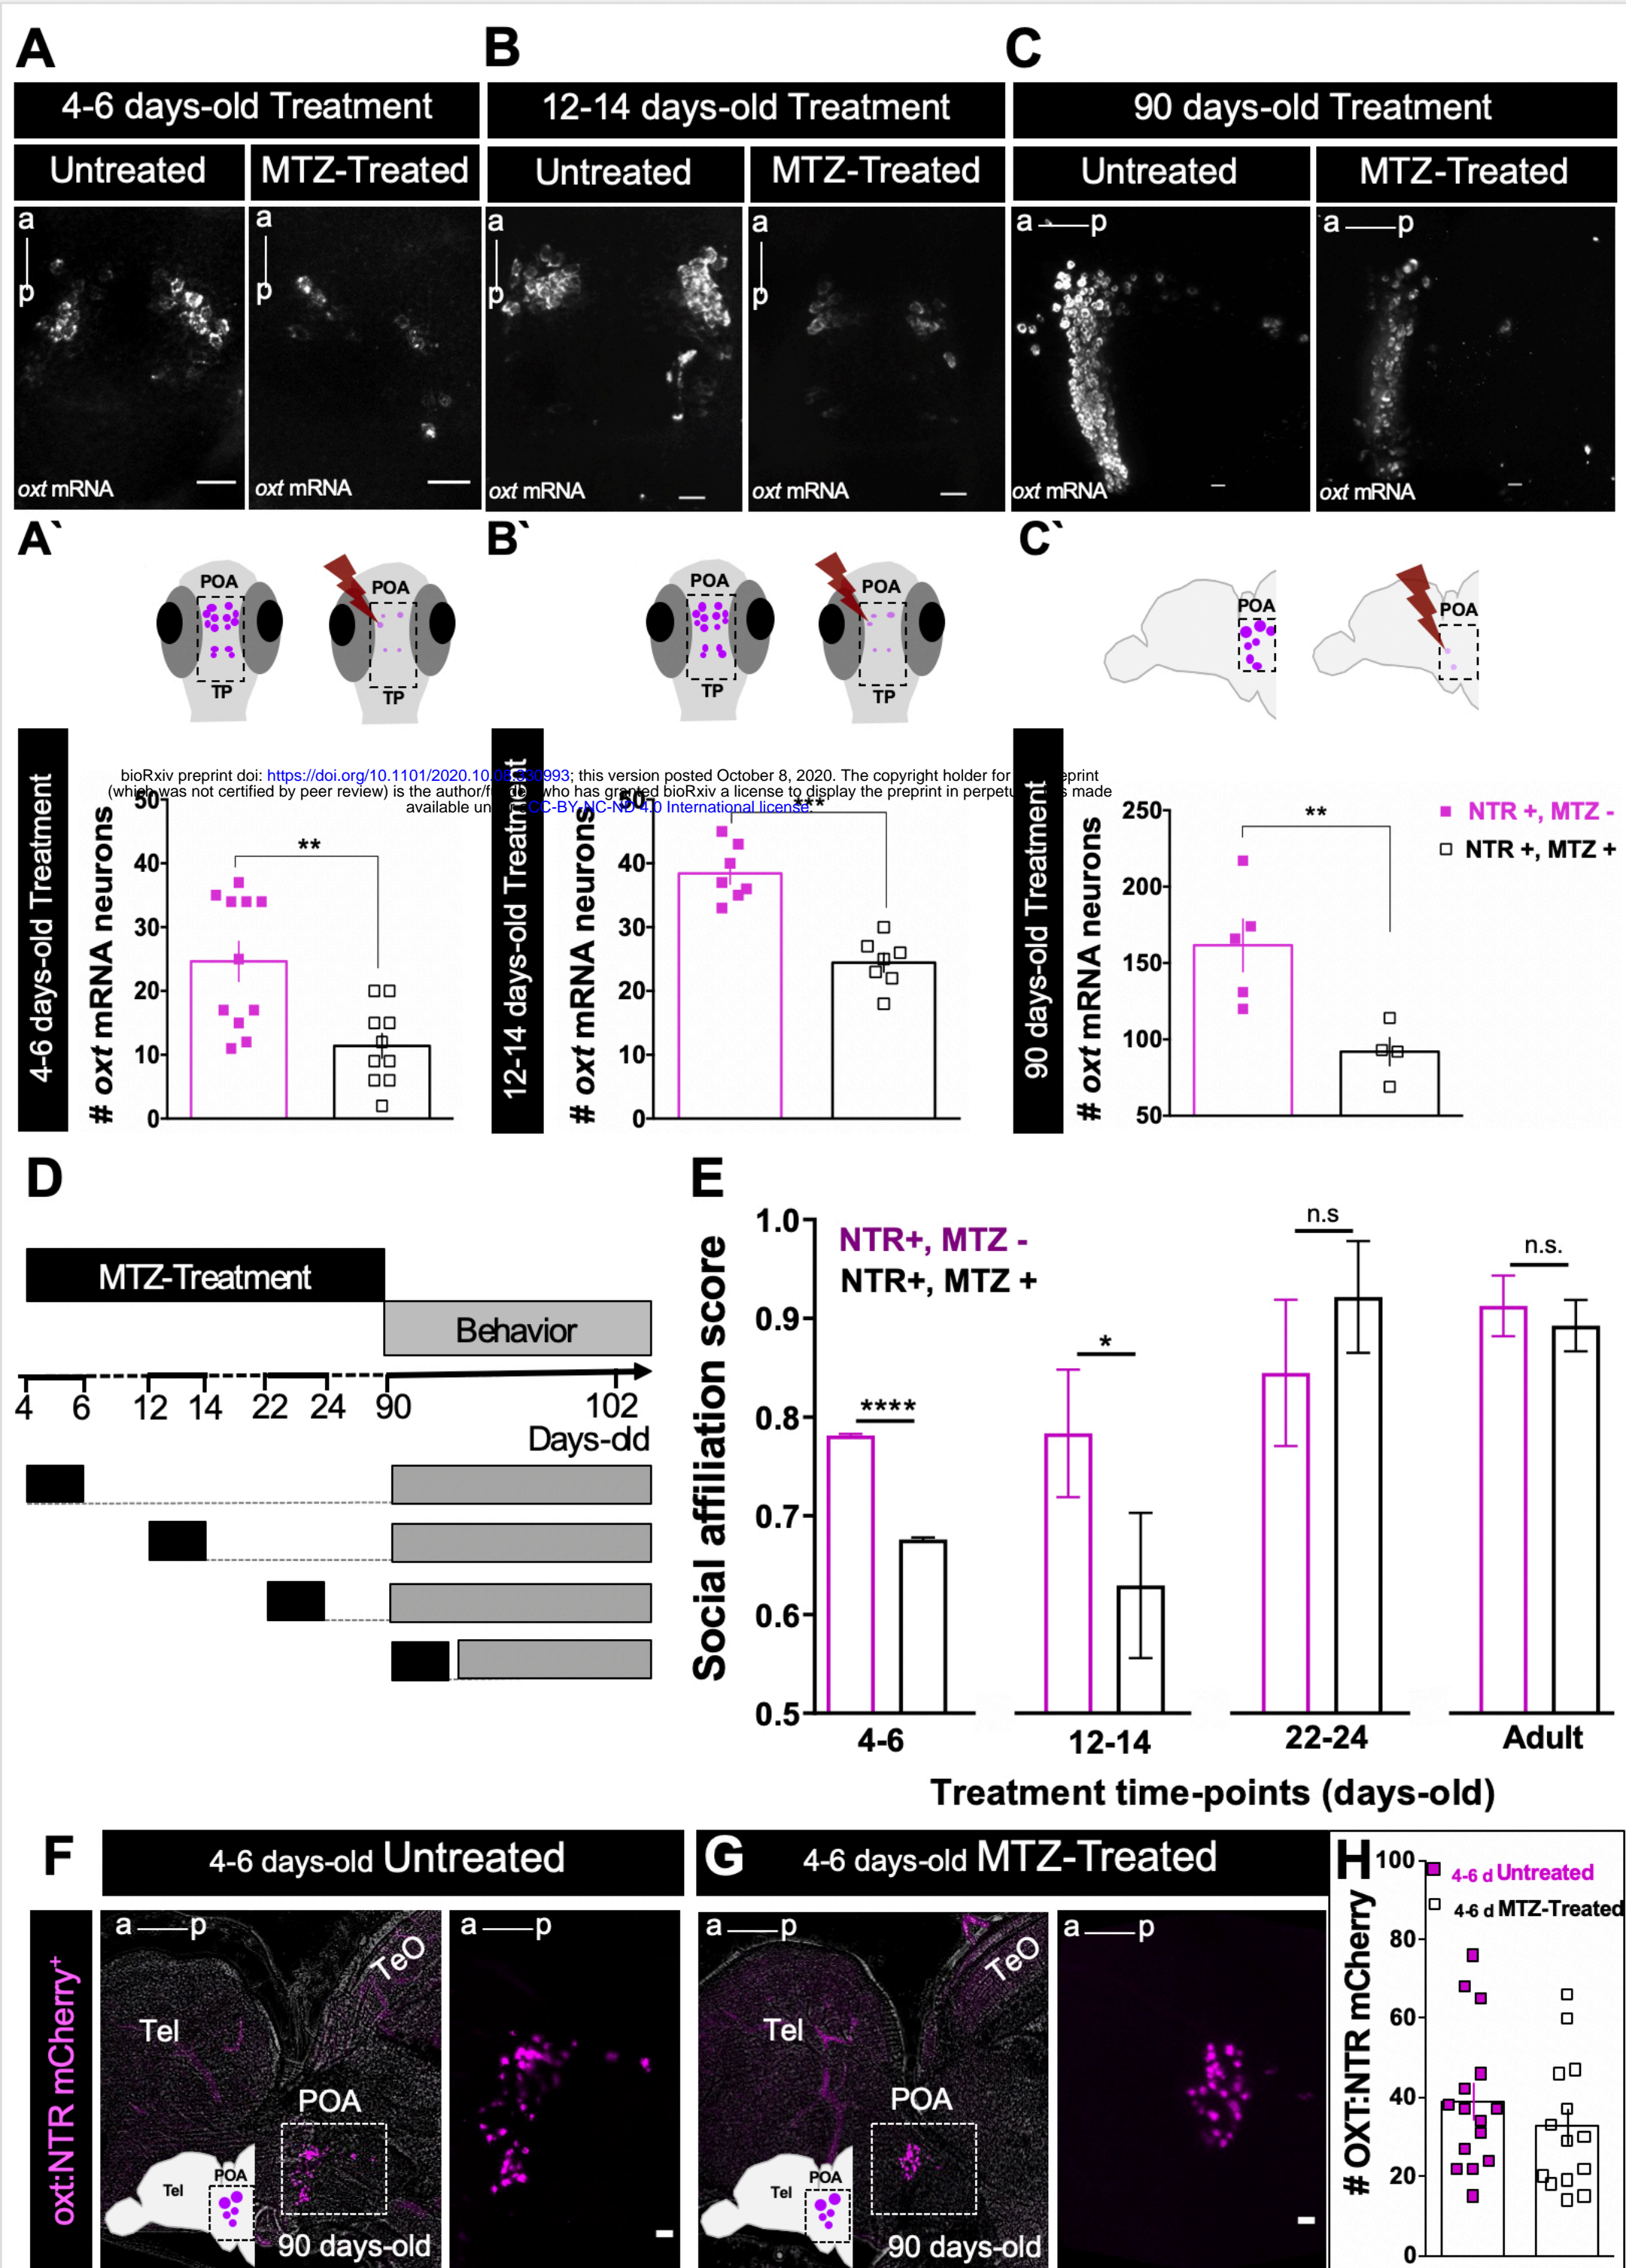

**Fig.2**

**Figure 2. Contrasting organizational vs activational effects of oxytocin neurons in adult social affiliation.** (A-C) Representative examples of the effects of metronidazole (MTZ)- induced ablation on endogenous OXT as detected by *in situ* hybridization, at different treatment time-points. (A) 4-6 days-old treatment and (B) 12-14 days-old treatment: whole-mount larvae confocal maximum intensity z-stack image, dorsal view, anterior to top; (C) 90 days-old treatment: sagittal brain slice, confocal maximum intensity z-stack image, anterior to left. Scale: 20  $\mu\text{m}$ . (A'-C') Quantification of the number of cells expressing OXT mRNA in untreated fish or following MTZ treatment at: (A') 4-6 days-old treatment. (B') 12-14 days-old treatment. (C') 90 days-old treatment. (D) Experimental timeline: fish were MTZ-treated at different developmental stages, allowed to grow until adulthood and then tested for social affiliation. (E) MTZ treatments during the first two weeks of life, but not later, affect adult social affiliation. Social affiliation score =  $\%T_{\text{shoal}} / (\%T_{\text{shoal}} + \%T_{\text{non-shoal}})$ . Eight independent cohorts were treated at 4-6 days-old, and only one cohort at later time points. Therefore, in order to obtain comparable sample sizes among the different age-treatment groups and a more representative sample, the data for 4-6 days-old MTZ treatment shown in this graph were generated by a Monte Carlo simulation with 1000 iterations of samples of 15 individuals of each group (4-6 days-old MTZ-treated vs. untreated; see Statistical analysis subsection for details). Data presented as mean  $\pm$  SEM. Full squares: untreated fish (NTR+, MTZ-); Open squares: MTZ-treated fish (NTR+, MTZ+), \* $p < 0.05$ , \*\* $p < 0.01$ , \*\*\*  $p < 0.001$ . \*\*\*\* $p < 0.0001$ . One-tailed p-values were used because there was an *a priori* directional hypothesis that MTZ-treatment would ablate OXT neurons in fish expressing the NTR transgene and induce a decrease in social affiliation behavior. (F-H) OXT neurons ablated at 4-6 days-old were recovered by adulthood. (F) Representative example of NTR-mCherry-expressing OXT neurons in untreated adult fish. (G) Representative example of NTR-mCherry-expressing OXT neurons in adult fish treated with MTZ at 4-6 days-old. Images in (F,G) are maximum intensity confocal z-stacks, sagittal slices, anterior to left. (H) Quantification of the number of NTR-mCherry cells in untreated (full squares) and 4-6 days-old MTZ-treated adult fish (empty squares).

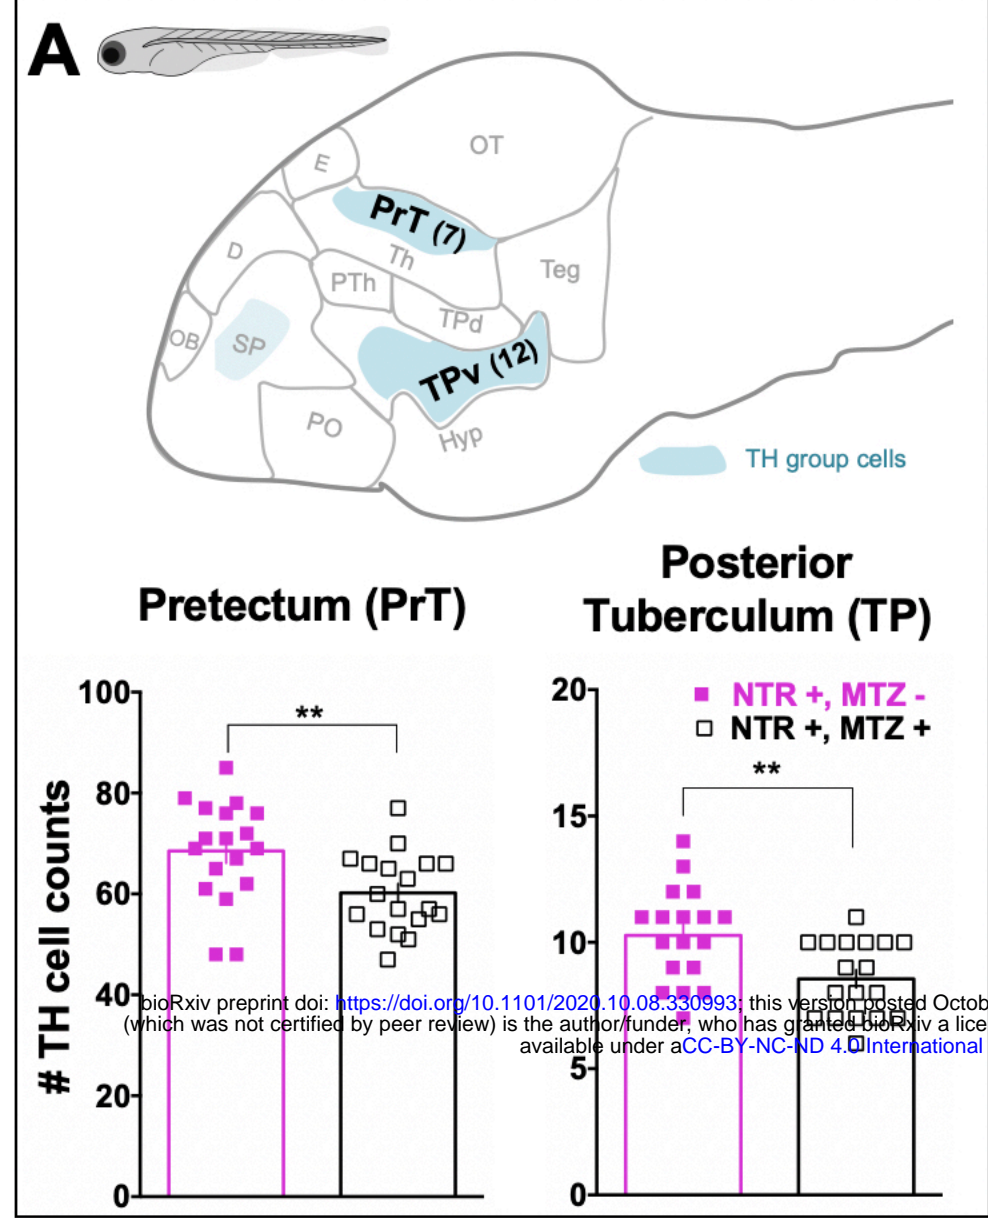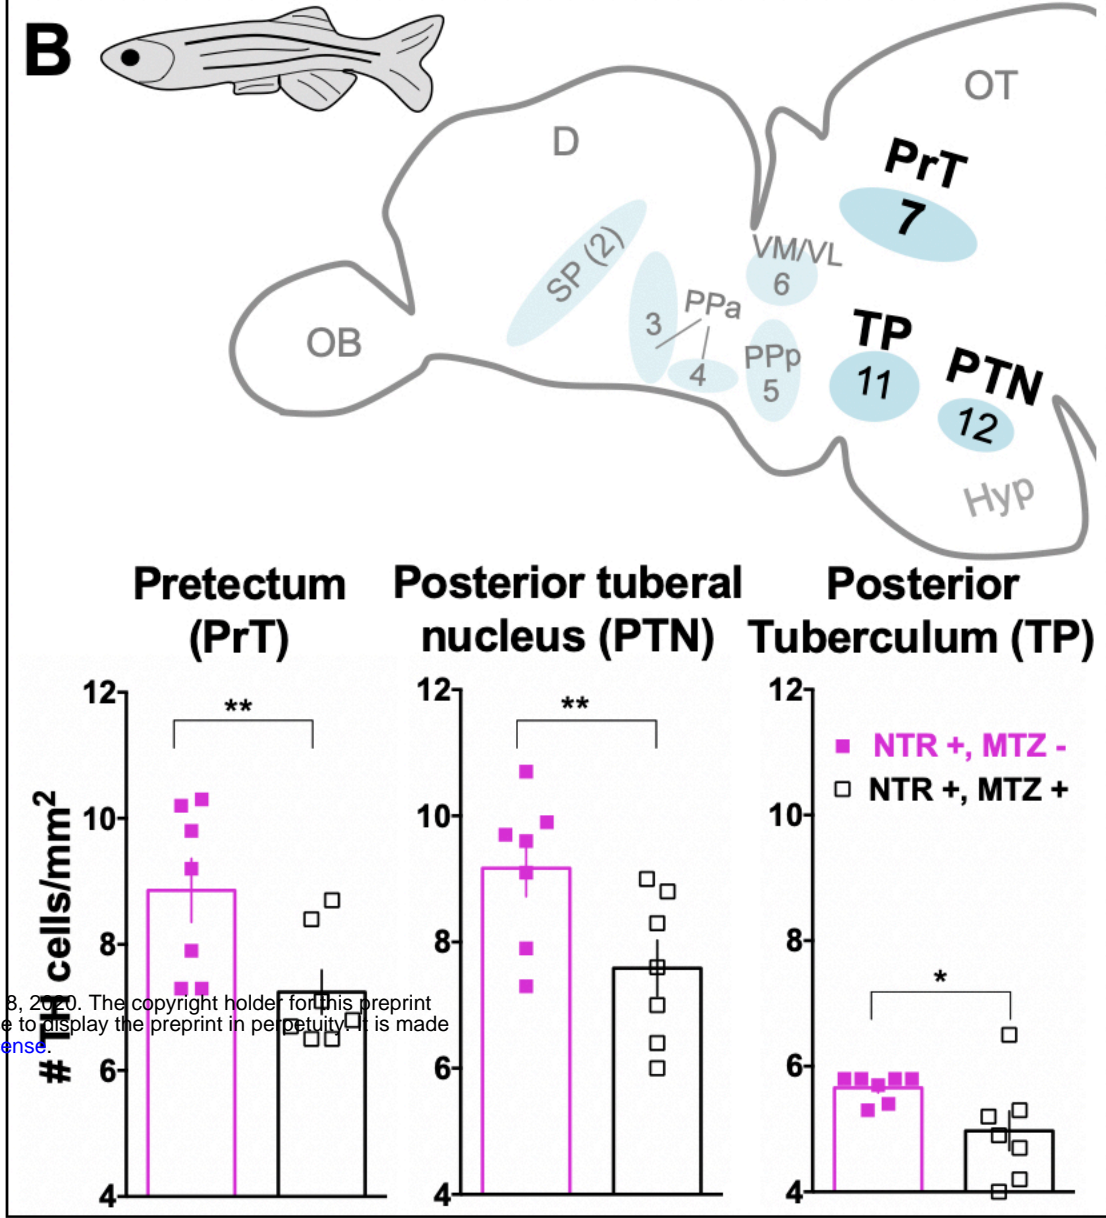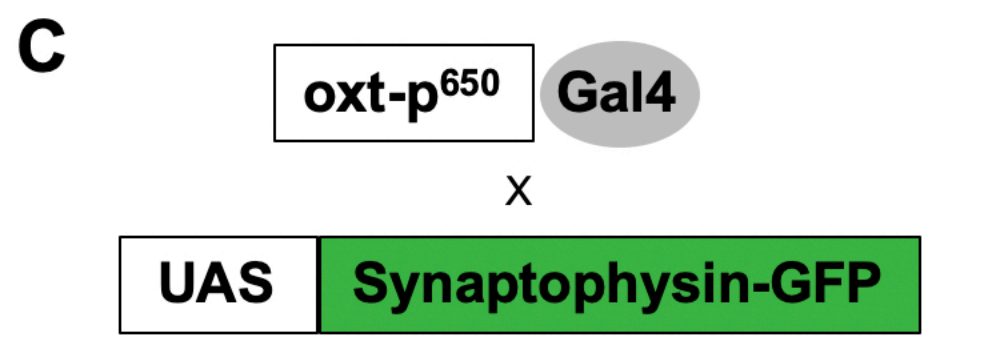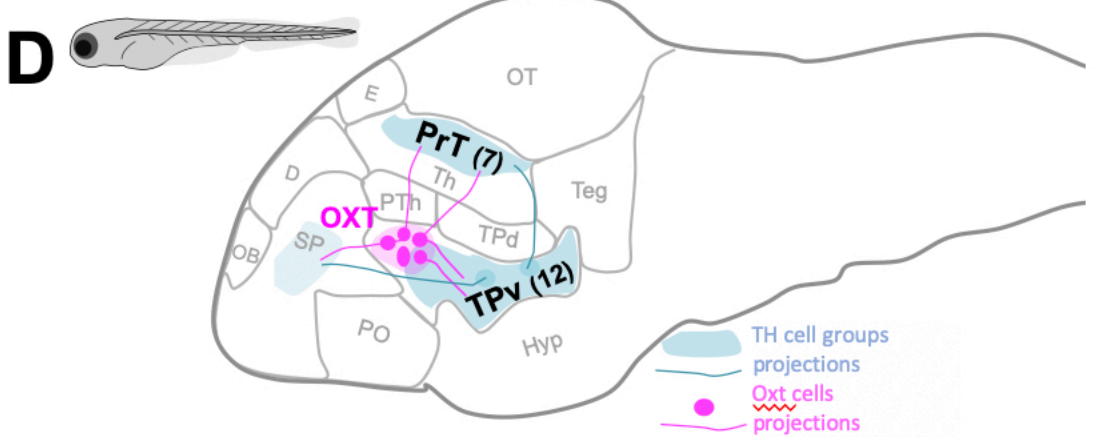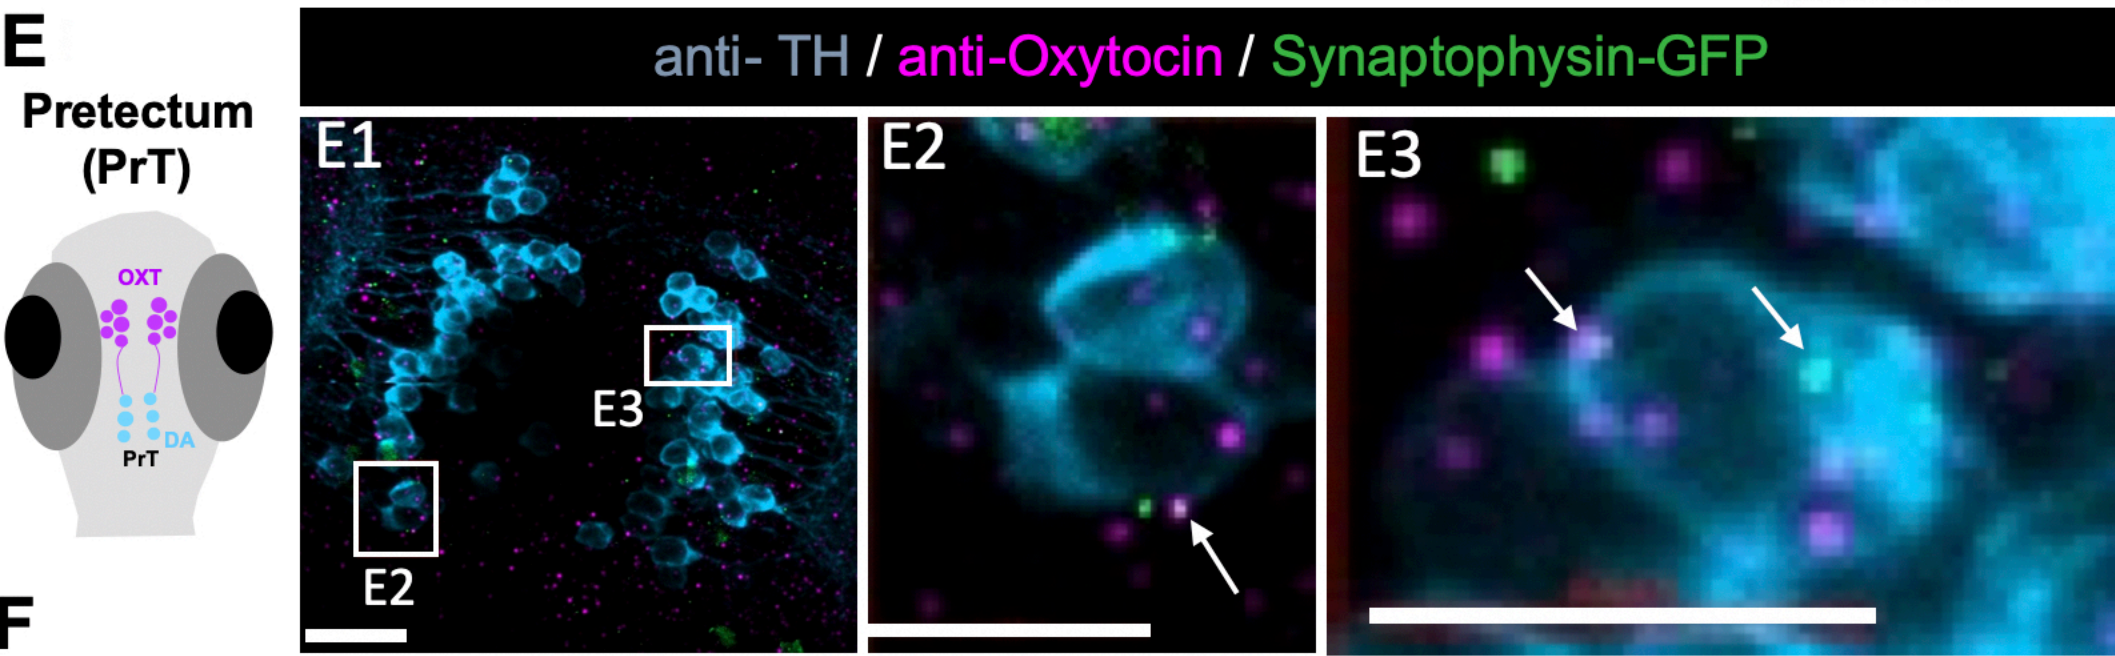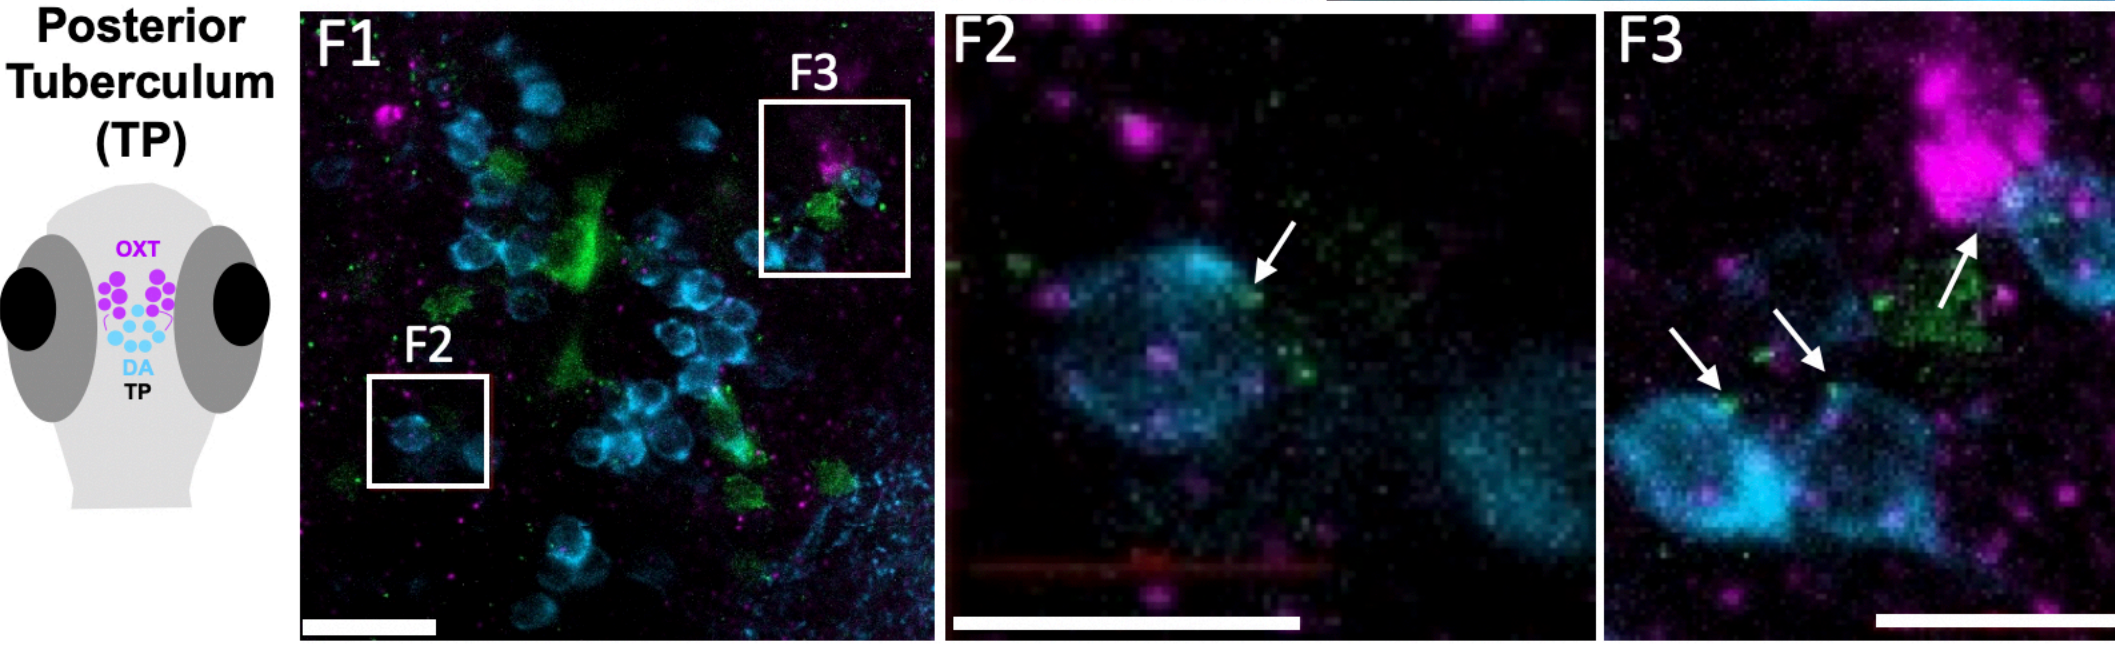

**Fig.3**

**Figure 3. Early-life OXT ablation affects the dopaminergic system.** (A) Top: Schematic sagittal section through a zebrafish larva brain showing the three dopaminergic clusters that were analyzed in this study, and highlighting two key dopaminergic brain areas that were affected by OXT neuronal ablation at 4-6 days-old, namely the pretectum (PrT) and posterior tuberculum (PT). Schematic was adapted from [zebrafishucl.org/forebrain-regions/posterior-tuberculum](http://zebrafishucl.org/forebrain-regions/posterior-tuberculum). Bottom: Quantification of total TH cell counts in untreated (NTR+, MTZ-) vs 4-6 days-old MTZ-treated (NTR+, MTZ+) larvae. (B) Top: Schematic sagittal section through a zebrafish adult brain, showing the eight dopaminergic clusters analyzed in this study, and highlighting the areas that were affected by OXT neuronal ablation at 4-6 days-old: PrT, PT and posterior tuberal nucleus (PTN). Bottom: Quantification of TH cell density (cells/mm<sup>2</sup>; mean of five sampled slices for each area, see Methods section for details) in brains of adult fish untreated (NTR+, MTZ-) or MTZ-treated a 4-6 days-old (NTR+, MTZ+). Dopaminergic groups are named according to [59,60]. (C) OXT neuron-specific labeling of synapses: *oxt:Gal4* drives the expression of the EGFP-fused synaptic vesicle marker synaptophysin-B in oxytocinergic synapses. (D) Schematic of a sagittal larva brain highlighting OXT neuronal projections (in magenta) to prepectal and posterior tuberculum dopaminergic clusters (in blue). (E, F) Representative example showing that the synaptic marker line synaptophysin-GFP (SY-GFP, green), driven under the OXT promoter, reveals bona fide OXT synapses containing the OXT peptide (anti-OXT, magenta) on TH positive cells (cyan) in both (E) prepectum and (F) posterior tuberculum clusters.

*CE*, cerebellar plate; *D*, dorsal telencephalon; *E*, epiphyysis; *OB*, olfactory bulb; *OT*, optic tectum; *PO*, preoptic area; *PrT*, prepectum; *TPd*, posterior tuberculum dorsal part; *PTH*, prethalamus; *TPv*, posterior tuberculum ventral part; *Teg*, tegmentum; *Th*, thalamus; *SP*, subpallium (includes *Vv*, *Vd* and *Vs* in adult); *Ppa*, anterior parvocellular preoptic nucleus; *VM*, ventromedial thalamic nucleus; *VI*, ventrolateral thalamic nucleus; *PPp*, posterior parvocellular preoptic nucleus; *PTN*, posterior tuberal nucleus; *Hyp*, hypothalamus; *NTR*, nitroreductase; *MTZ*, Metronidazole.

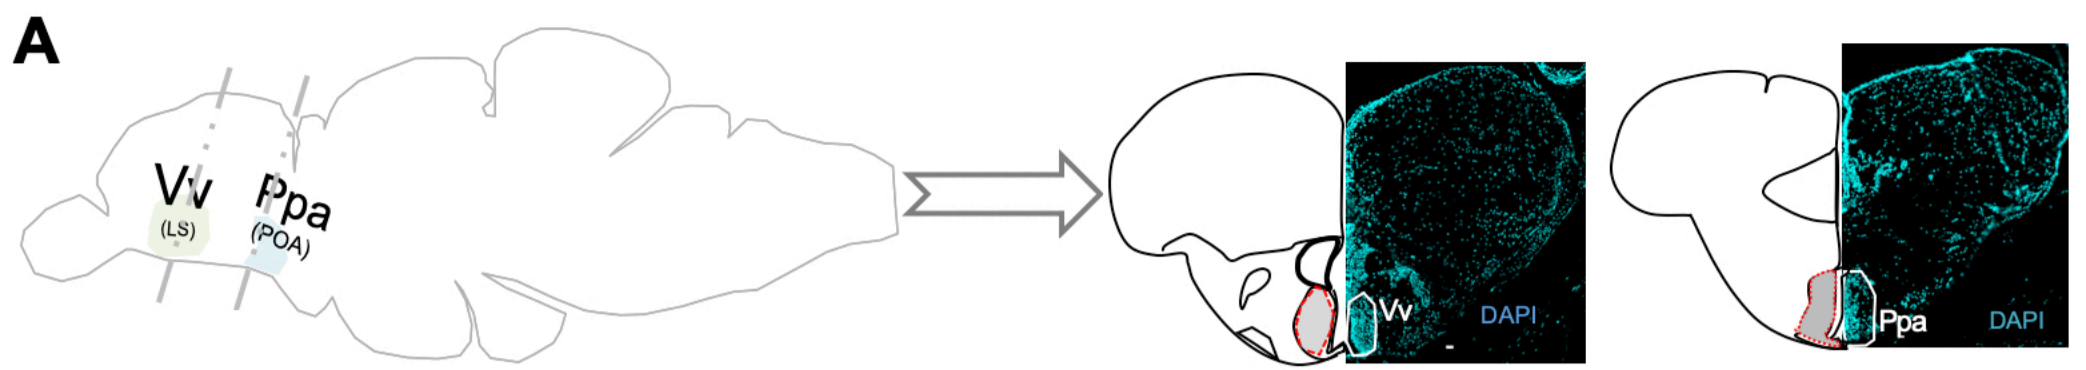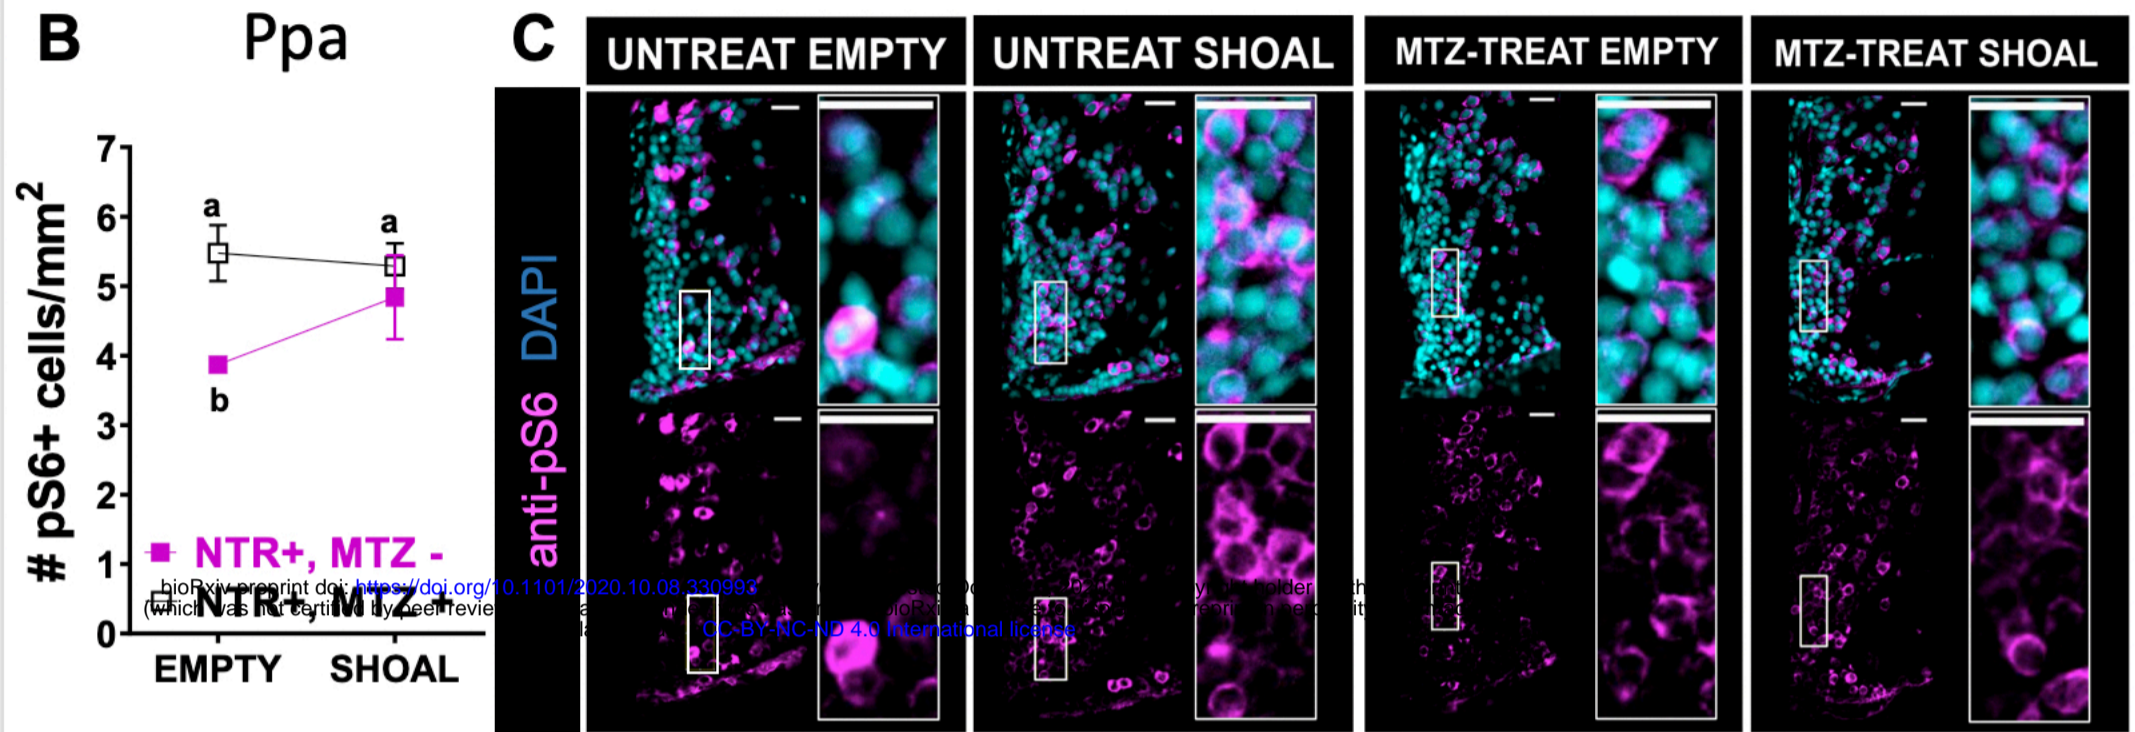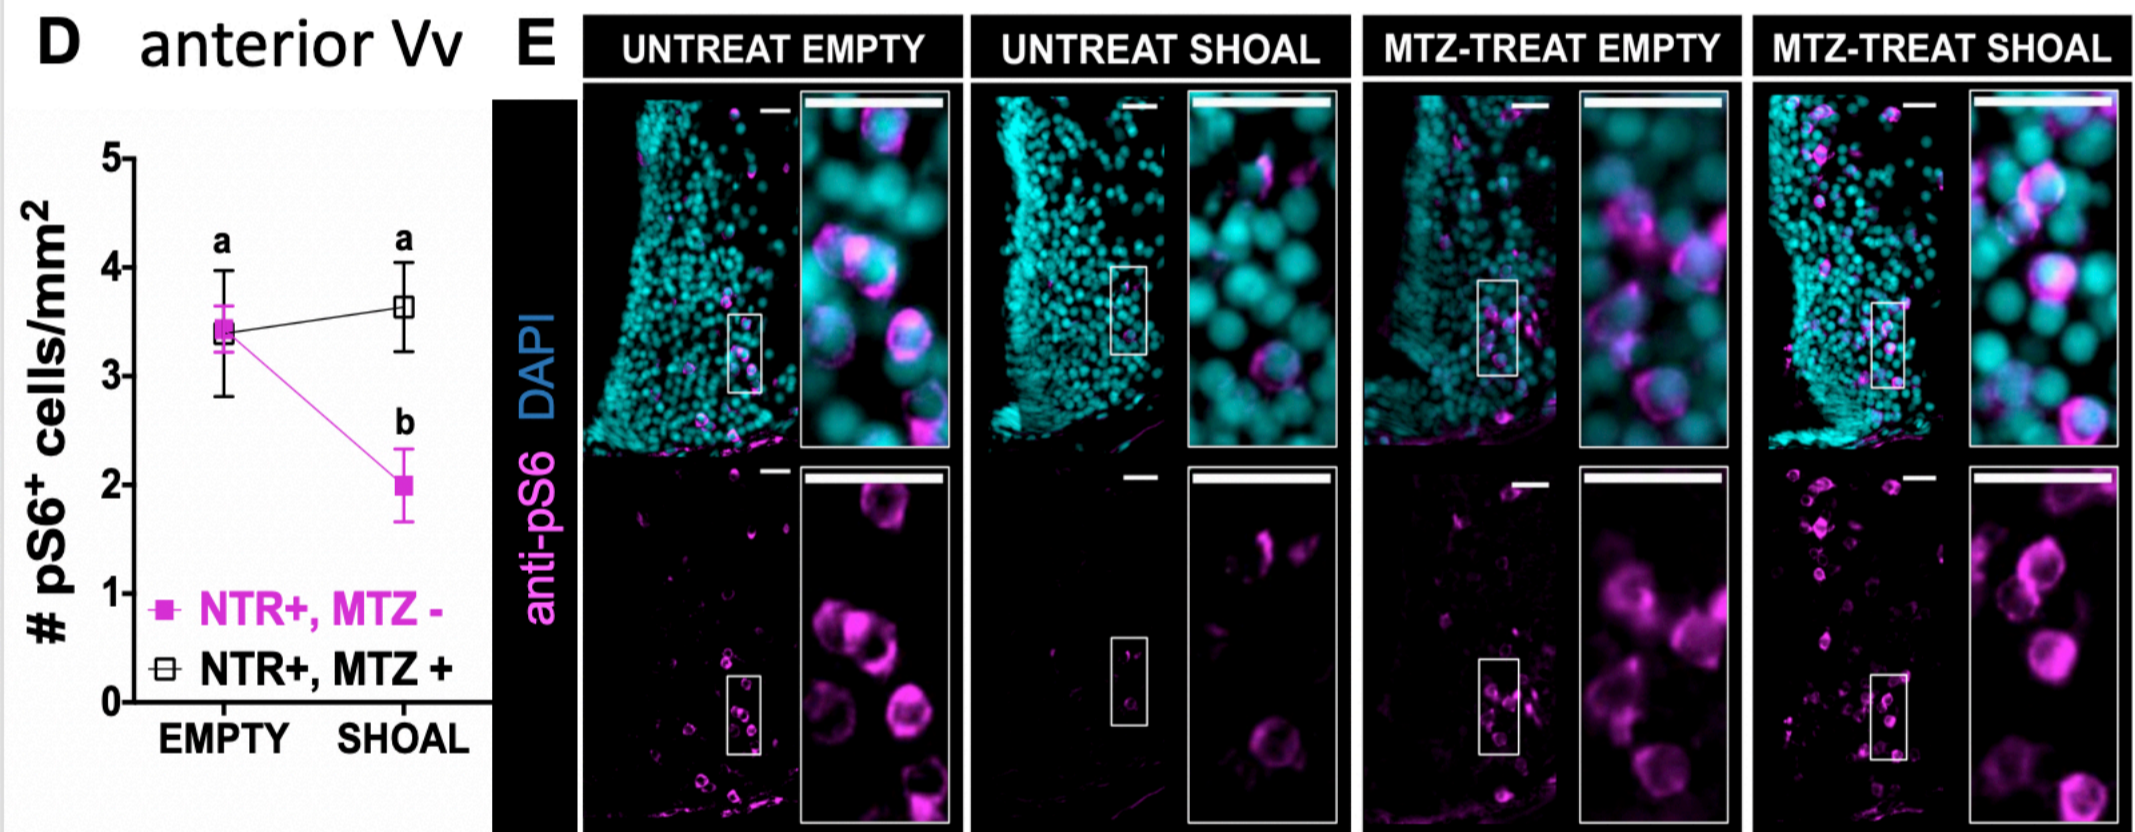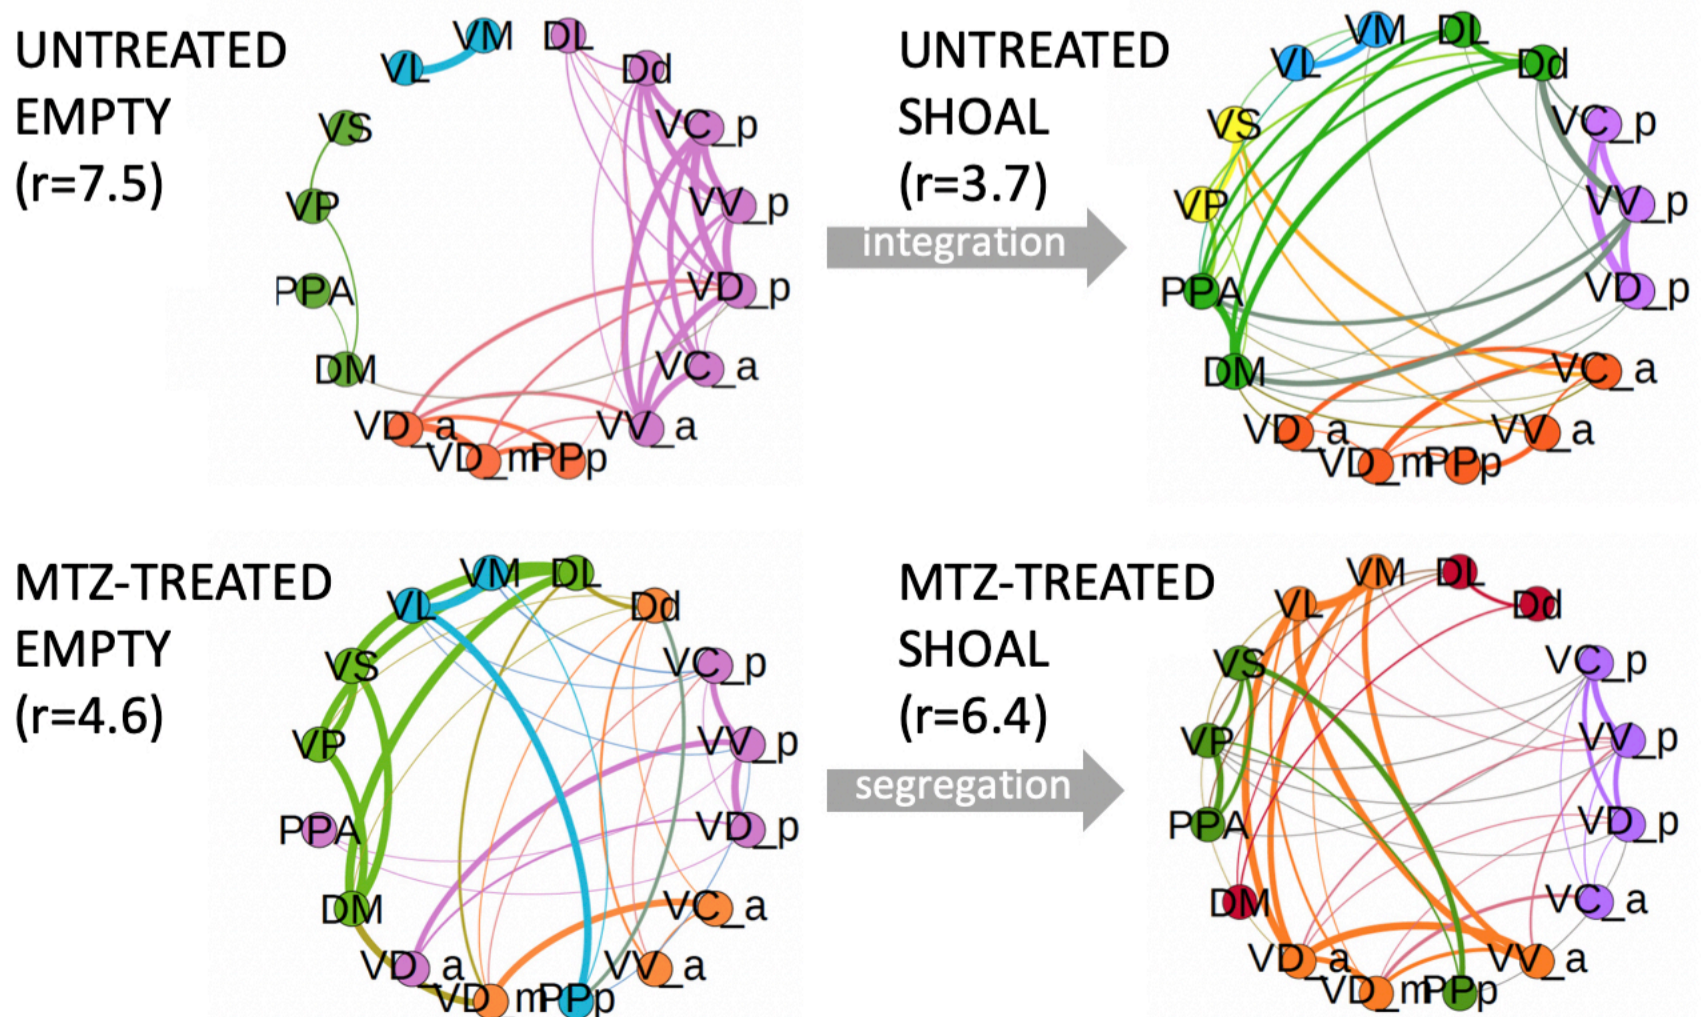

**Fig.4**

**Figure 4. Early-life OXT shapes social information processing.** (A) Anatomical localization of the two social responsive areas: anterior part of the ventral nucleus of the ventral telencephalon (Vv\_a) and anterior part of the parvocellular preoptic nucleus (Ppa). Brain areas identified by DAPI. (B-E) Quantification of the density (cells/mm<sup>2</sup>) of cells expressing the neuronal marker pS6 in 4-6 days-old MTZ-treated (open squares) or untreated adult fish (full squares), after exposure to either a shoal of conspecifics or an empty tank for 10 min in the Ppa area (B) and anterior Vv area (D) and respective representative examples (C, E). Scale: 20  $\mu$ m. Data presented as mean  $\pm$  SEM. (F) Changes in the modular structure of functional connectivity. Modules were obtained by extracting central partition from 400 optimization of Leiden algorithm [44] on the treatment correlation matrices. Node color indicates community membership. For visualisation purposes, we only show links with correlation weight >0.1.  $r$  values indicate the ratio of total edge weight within and between modules. High (low) values of  $r$  indicate more (less) segregated modular structure.

**A**

oxt-p<sup>650</sup>
Gal4
X
UAS
NTR-mCherry

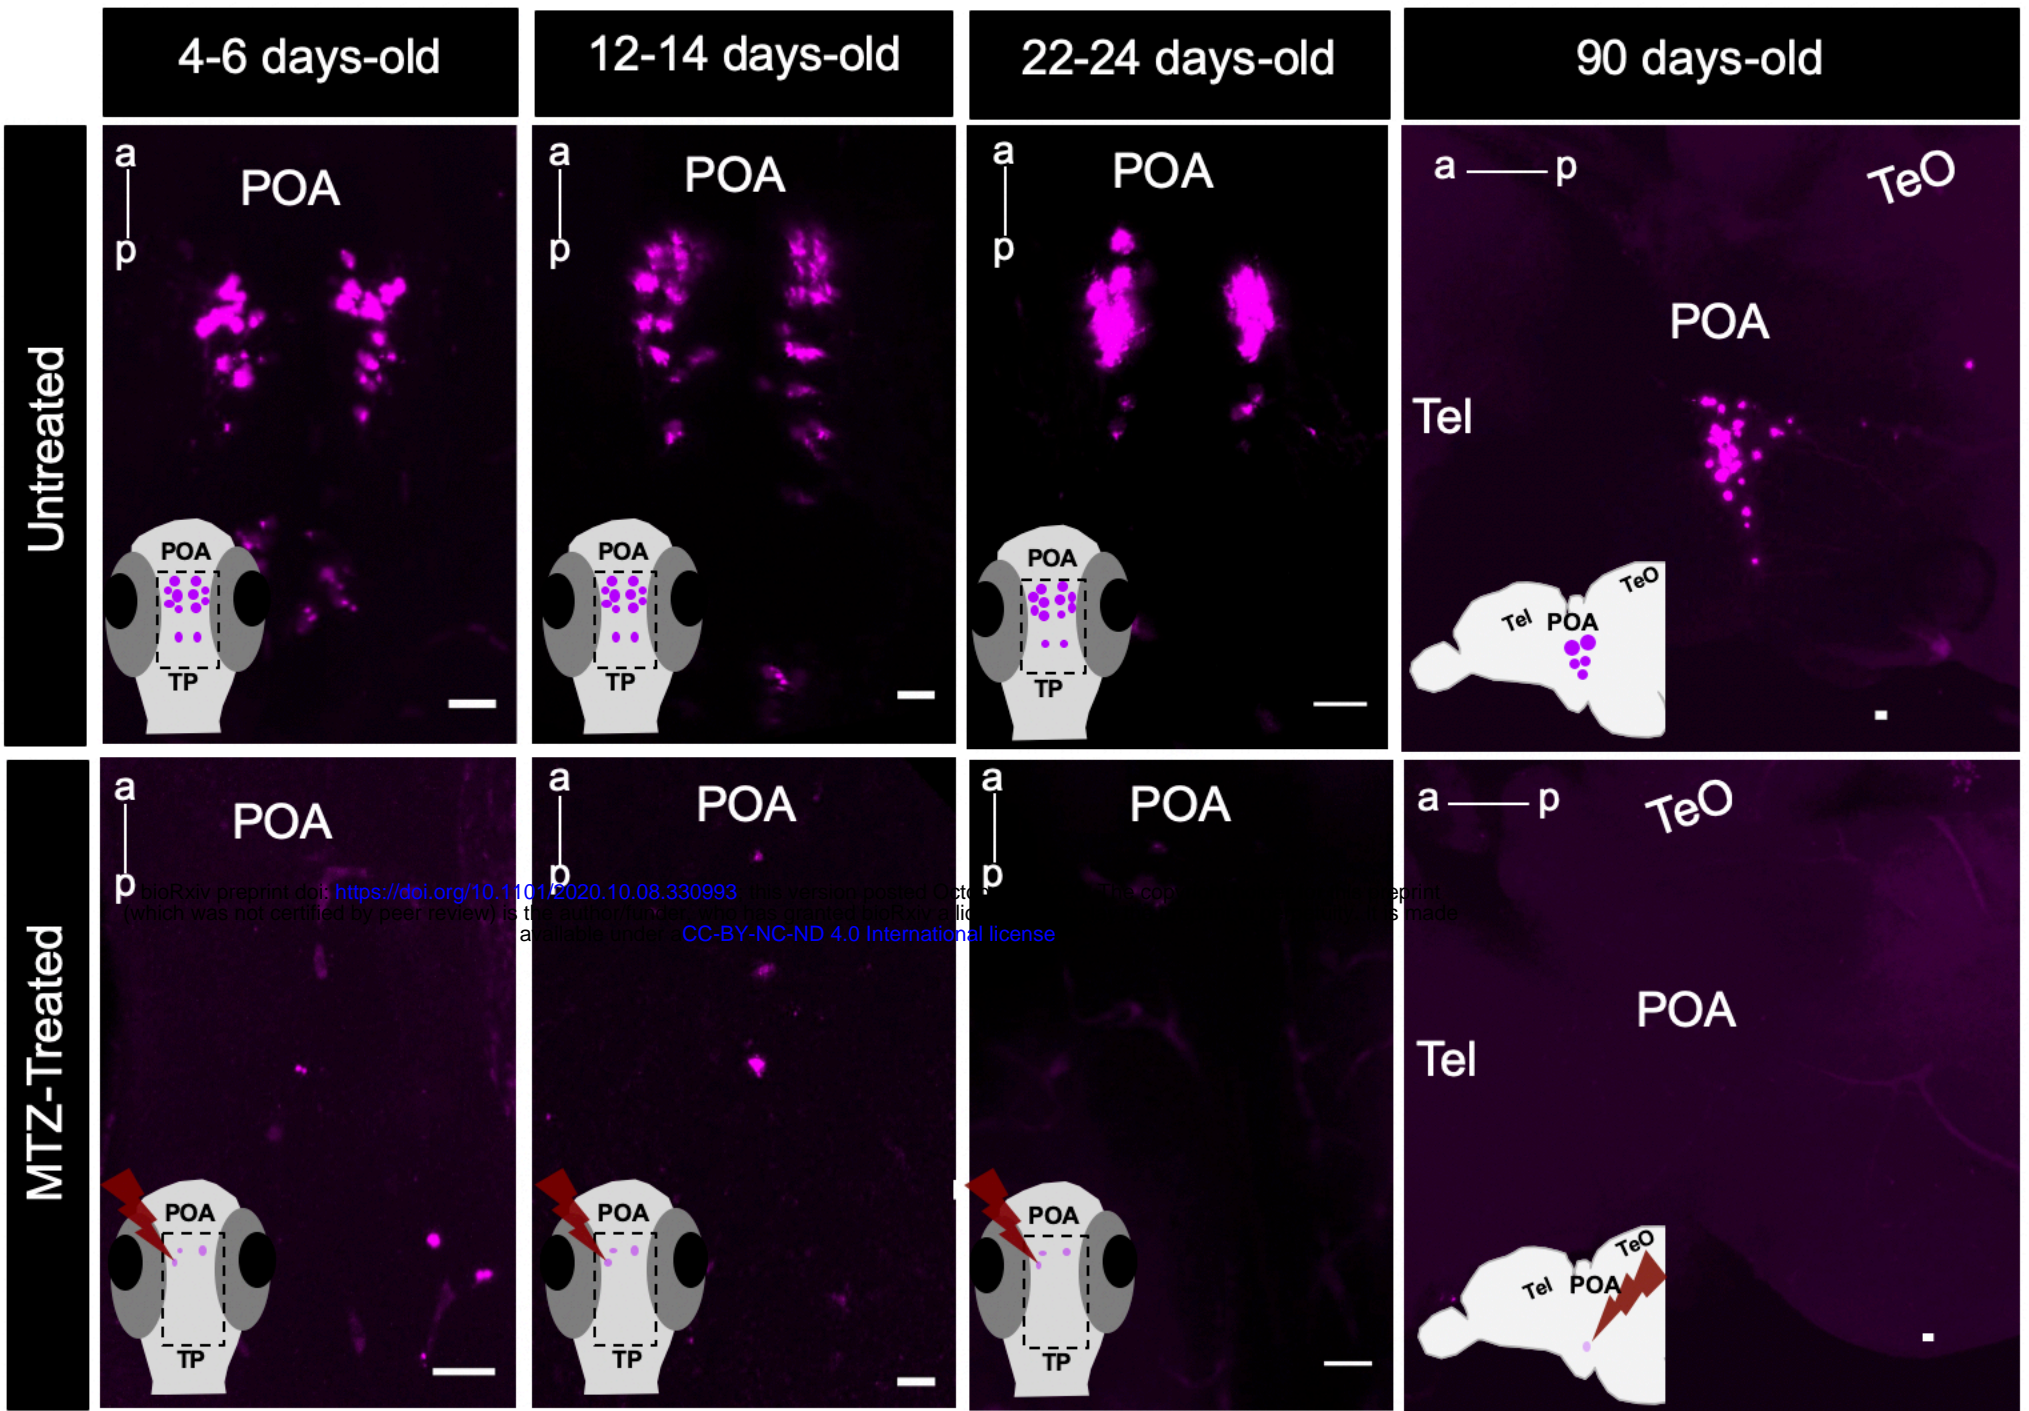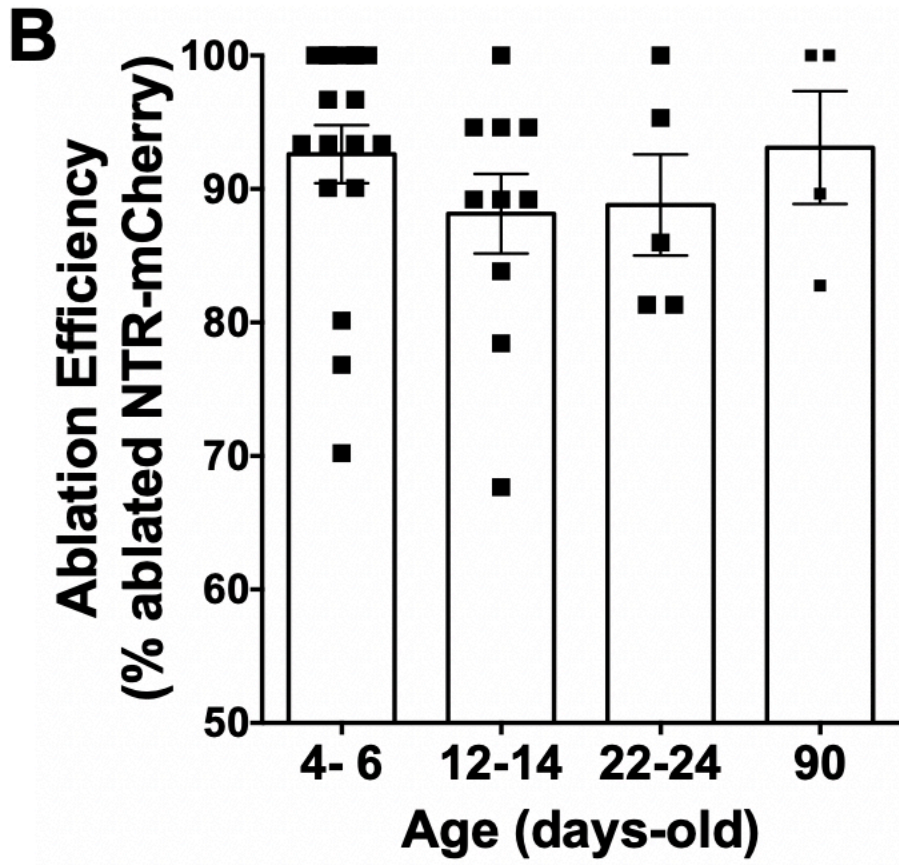

**Fig. S1-related to Fig. 2**

**Figure S1-Related to Figure 2- Spatio-temporal control of OXT-specific transgene expression.** (A) Representative example of the MTZ-treatment effect on transgene (*oxt:GAL4/UAS-NTR-mCherry*) at different treatment time-points. For 4-6, 12-14 and 22-24 days-old: whole mount larvae, maximum intensity confocal z-stack image, dorsal view, anterior to top; for 90 days-old: sagittal brain slice, maximum intensity confocal z-stack image, anterior to left. Scale: 20  $\mu m$ . (B) Quantification of the effect of MTZ treatment on transgene expression at all ages tested (4-6 days-old, n=17; 12-14, n=10; 22-24 days-old, n=5; 90 days-old, n=4). Ablation efficiency was measured as percentage of ablated cells in MTZ-treated fish over mean number of NTR-mcherry cells in untreated fish. *NPO*, neurosecretory preoptic area; *Tel*, Telencephalon; *TeO*, tectum optic.



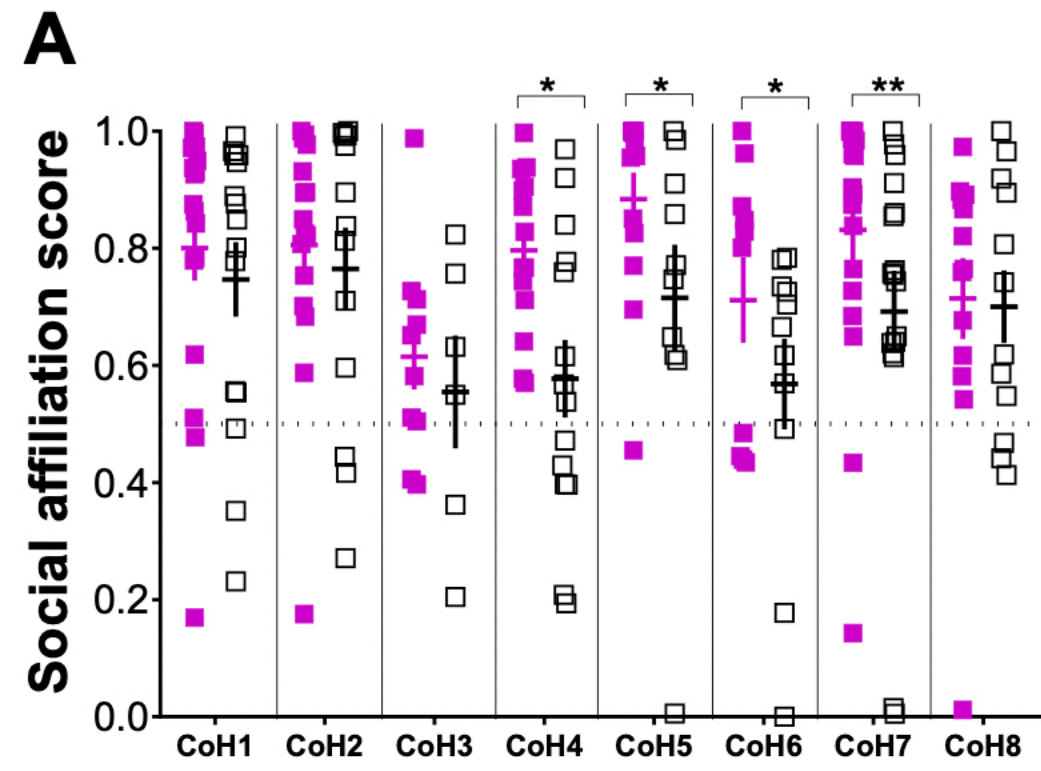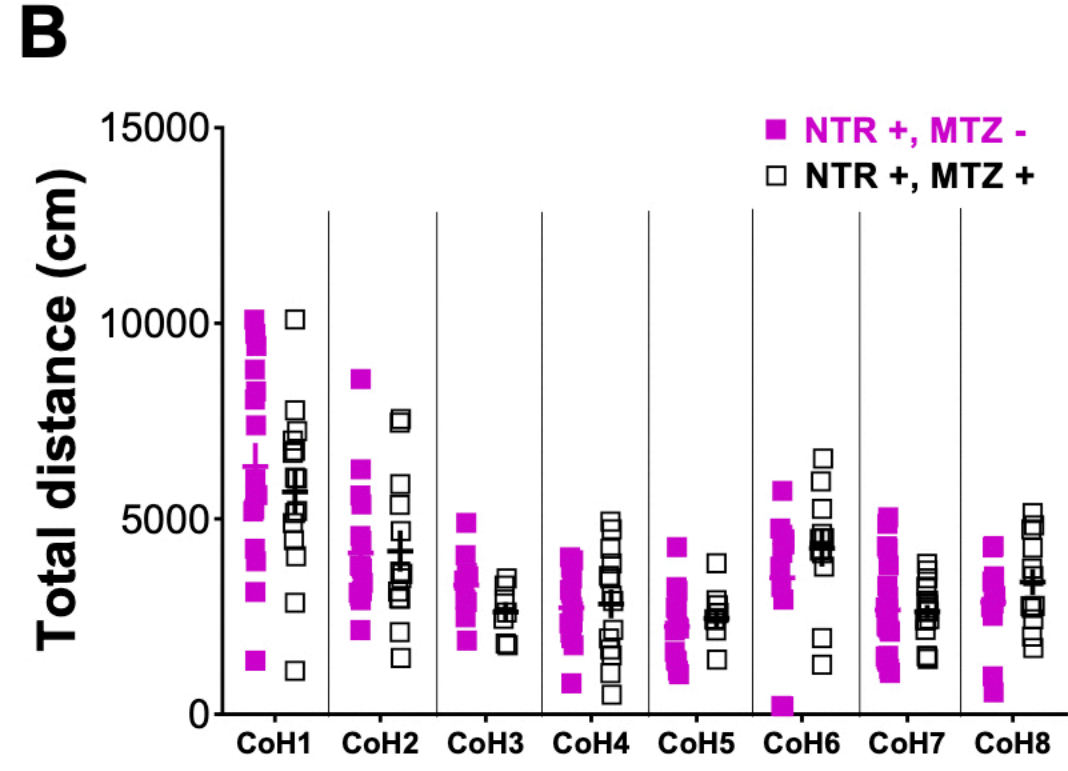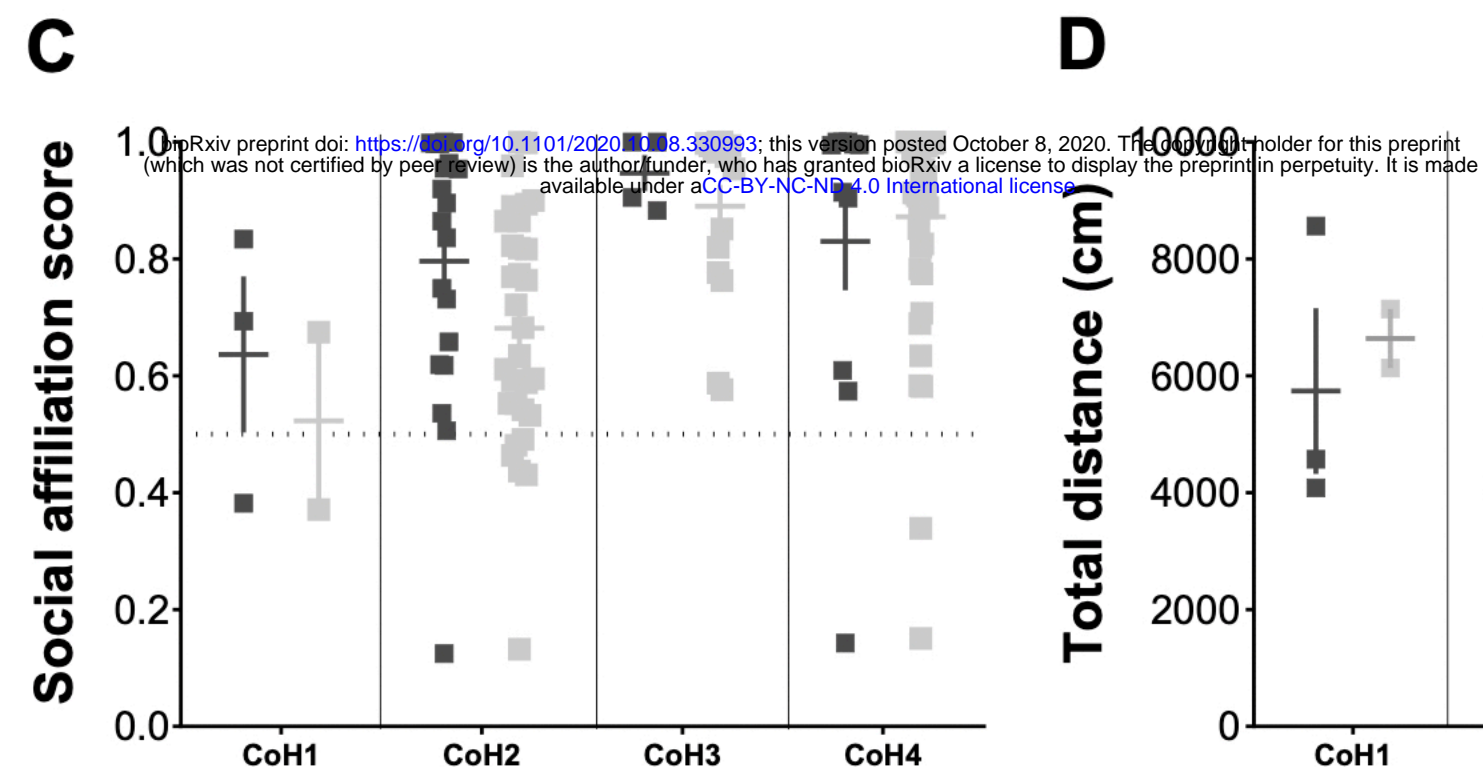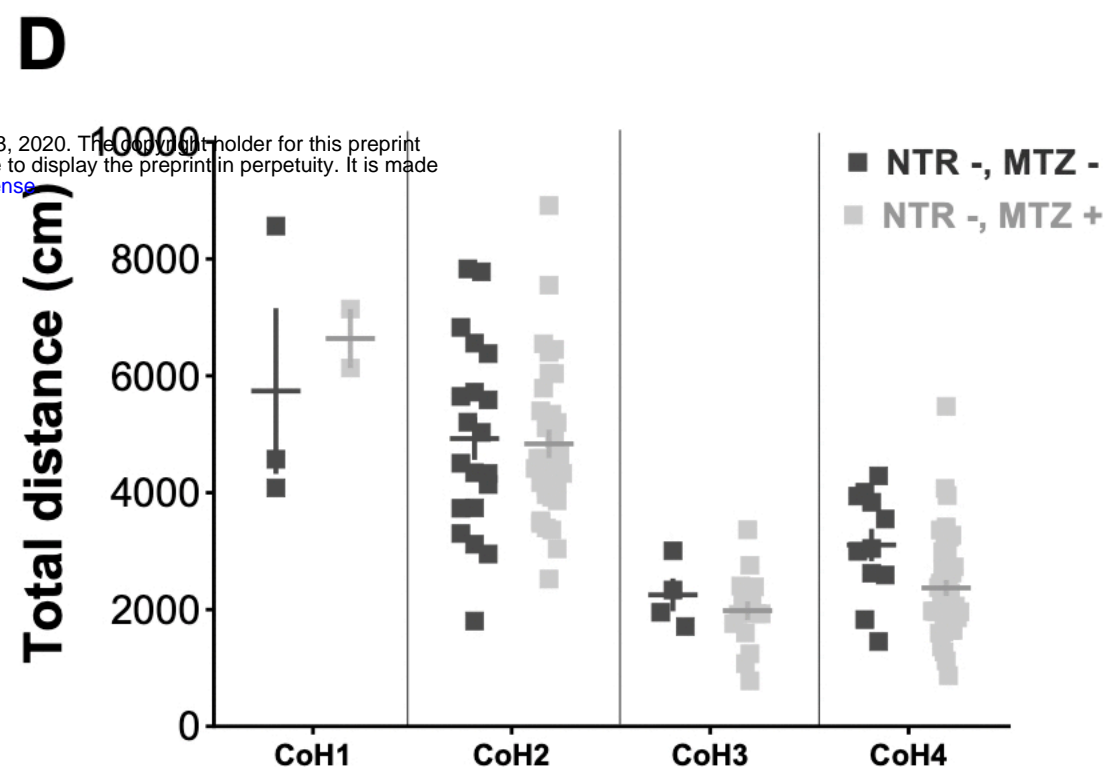

**Fig S2- related to Fig.2**

**Figure S2. Related to Figure 2. Organizational vs activational effects of oxytocin neurons in adult social affiliation.** Effect of early (4-6 days-old) MTZ treatment on (A) adult social affiliation; (B) total distance moved of eight independent cohorts of either MTZ treated at 4-6 days-old (NTR+, MTZ+) or untreated control fish (NTR+, MTZ-); (C) adult social affiliation and (D) total distance moved of control cohorts not expressing the transgene, 4-6 days-old MTZ-treated (NTR-, MTZ+) or untreated (NTR-, MTZ-). One-tailed p-values were considered in (A) because of our *a priori* directionality hypothesis that by ablating OXT neurons, MTZ treatment of fish expressing NTR transgene would decrease social affiliation behavior. Data are presented as mean  $\pm$  SEM. Full squares (purple or dark gray): untreated fish (MTZ-); open square or light gray: MTZ-treated fish (MTZ+).

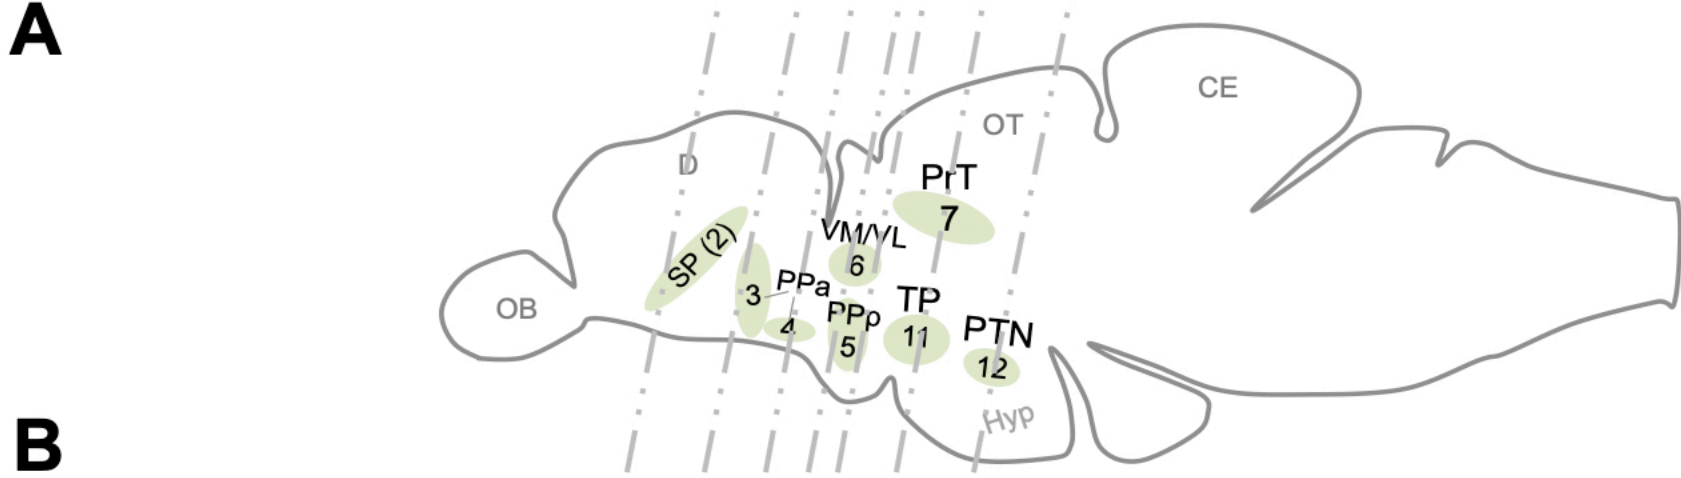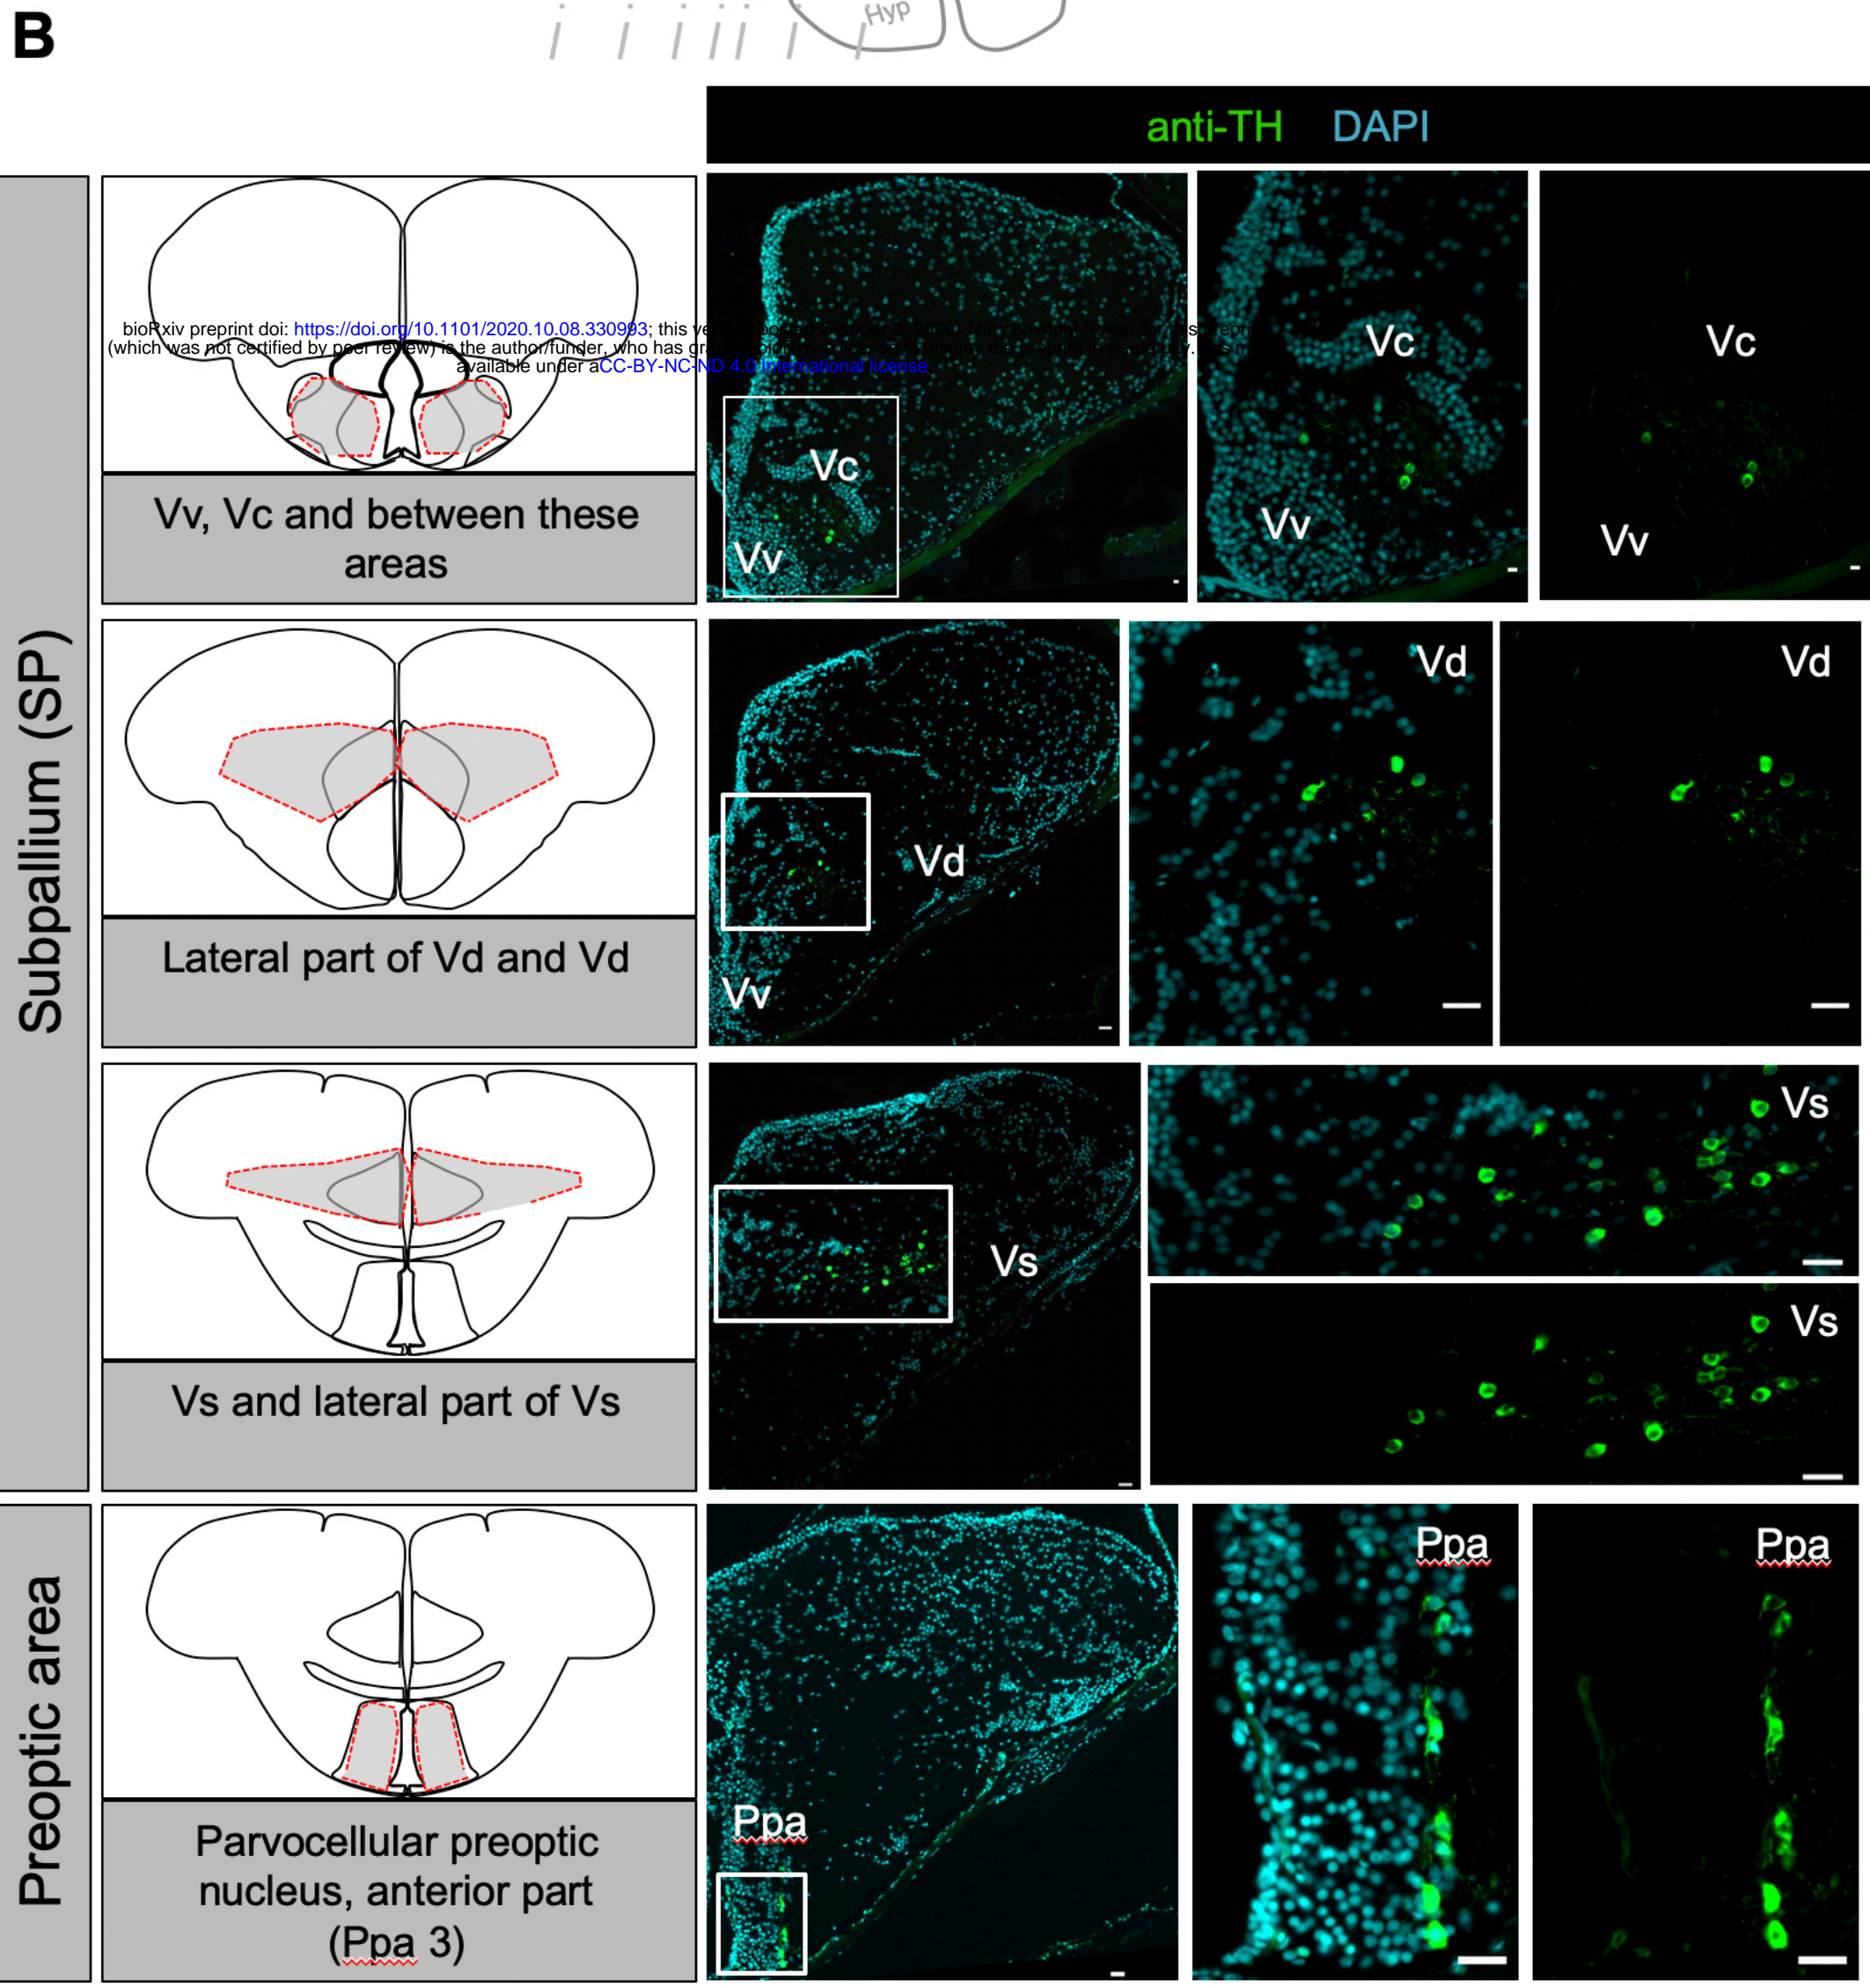

**Fig. S3- related to Fig.3**

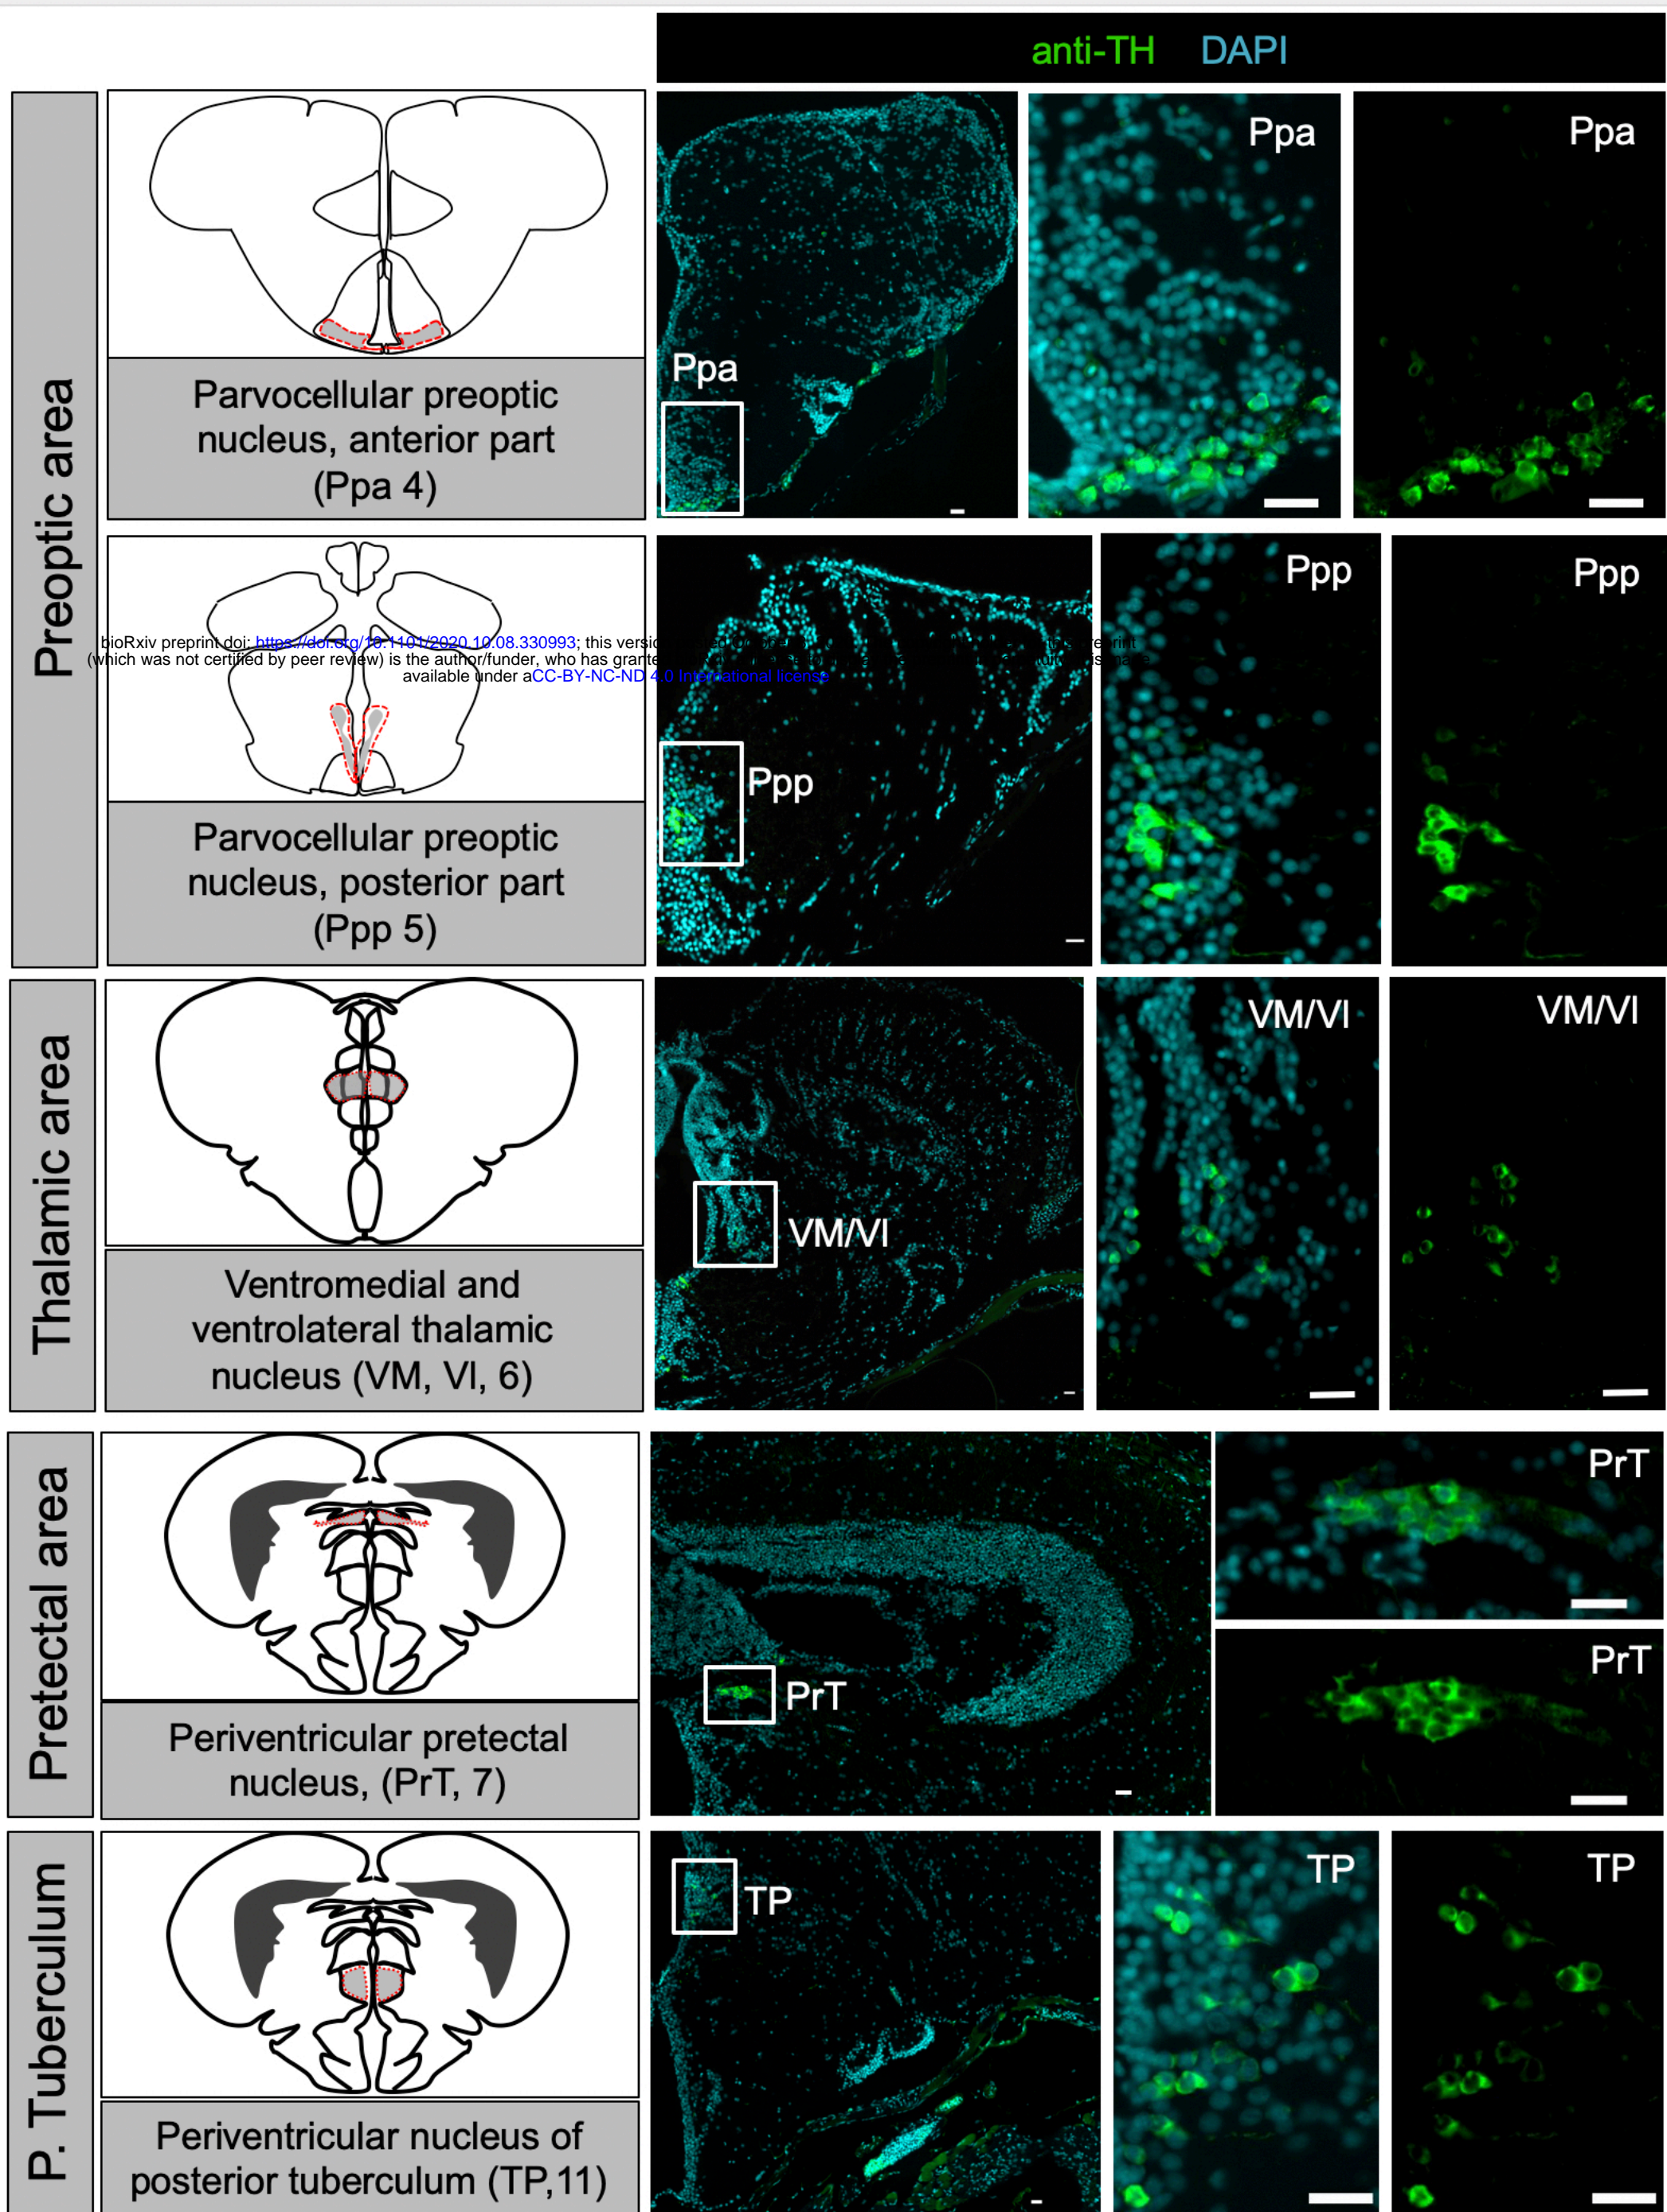

**Fig. S3 (cont.)- related to Fig.3**

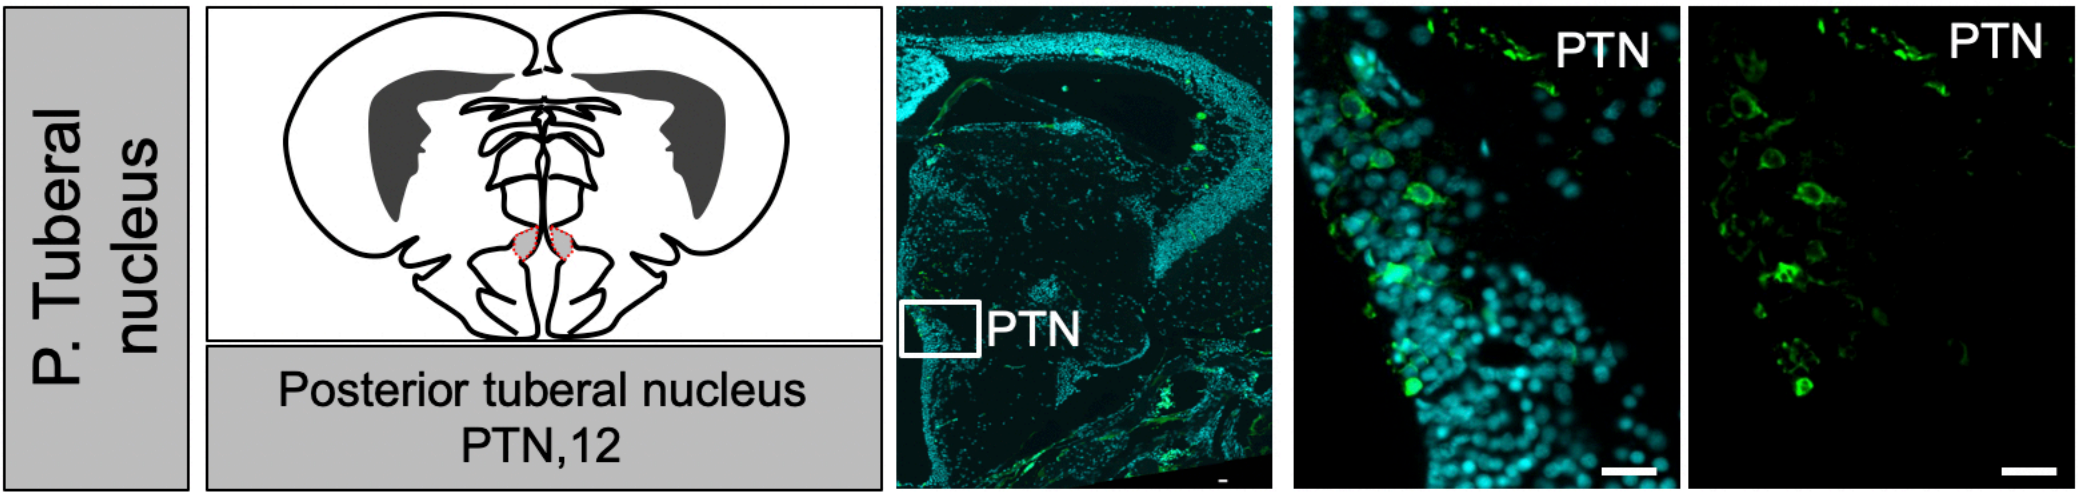

bioRxiv preprint doi: <https://doi.org/10.1101/2020.10.08.330993>; this version posted October 8, 2020. The copyright holder for this preprint (which was not certified by peer review) is the author/funder, who has granted bioRxiv a license to display the preprint in perpetuity. It is made available under aCC-BY-NC-ND 4.0 International license.

**Fig. S3 (cont.)- related to Fig.3**

**Figure S3. Related to Figure 3. Early life OXT ablation affects the dopaminergic system.** (A) Schematic representation of an adult zebrafish sagittal view representing the coronal sections of all dopaminergic areas sampled in the adult brain (dopaminergic cluster nomenclature accordingly to [60]). (B) Schematic representation of zebrafish brain coronal sections highlighting the different dopaminergic clusters (adapted from [70]) and representative example showing anatomical localization of the dopaminergic groups in an untreated adult zebrafish. Landmarks of the areas identified by DAPI (cyan) and dopaminergic groups by TH (Tyrosine Hydroxylase) immunostaining (green). Scale bars are 20 $\mu$ m.

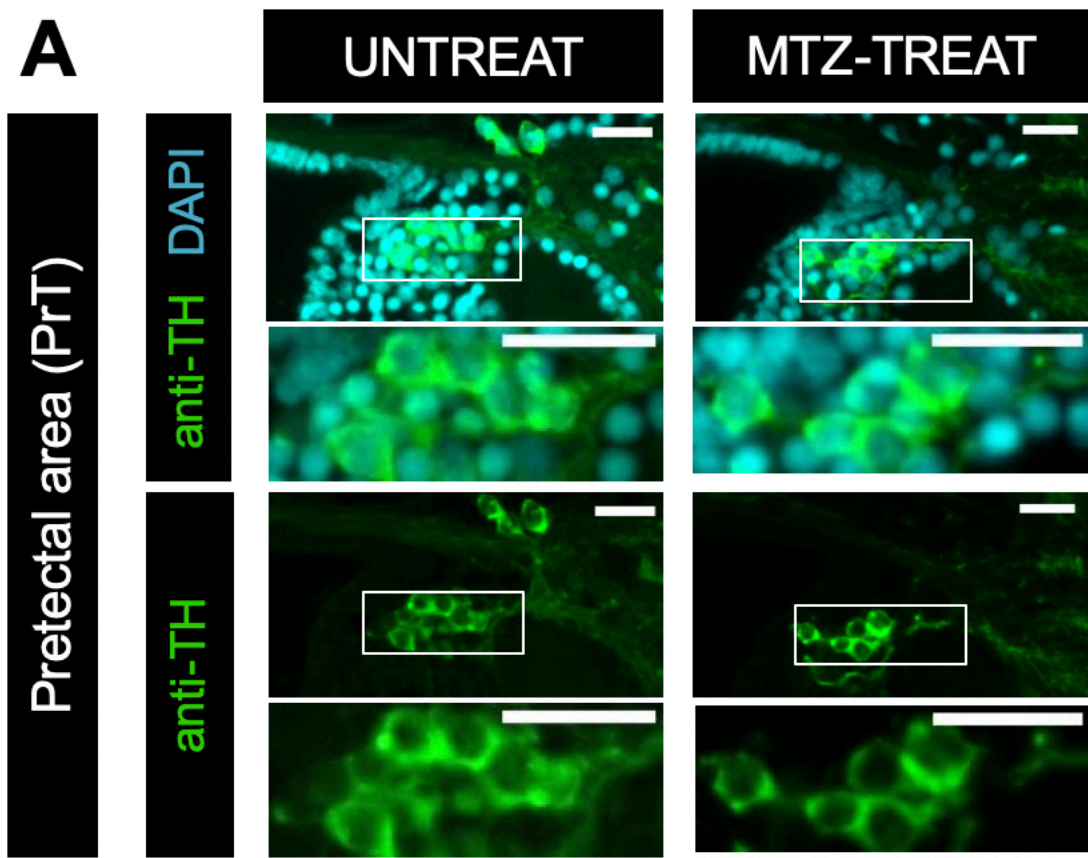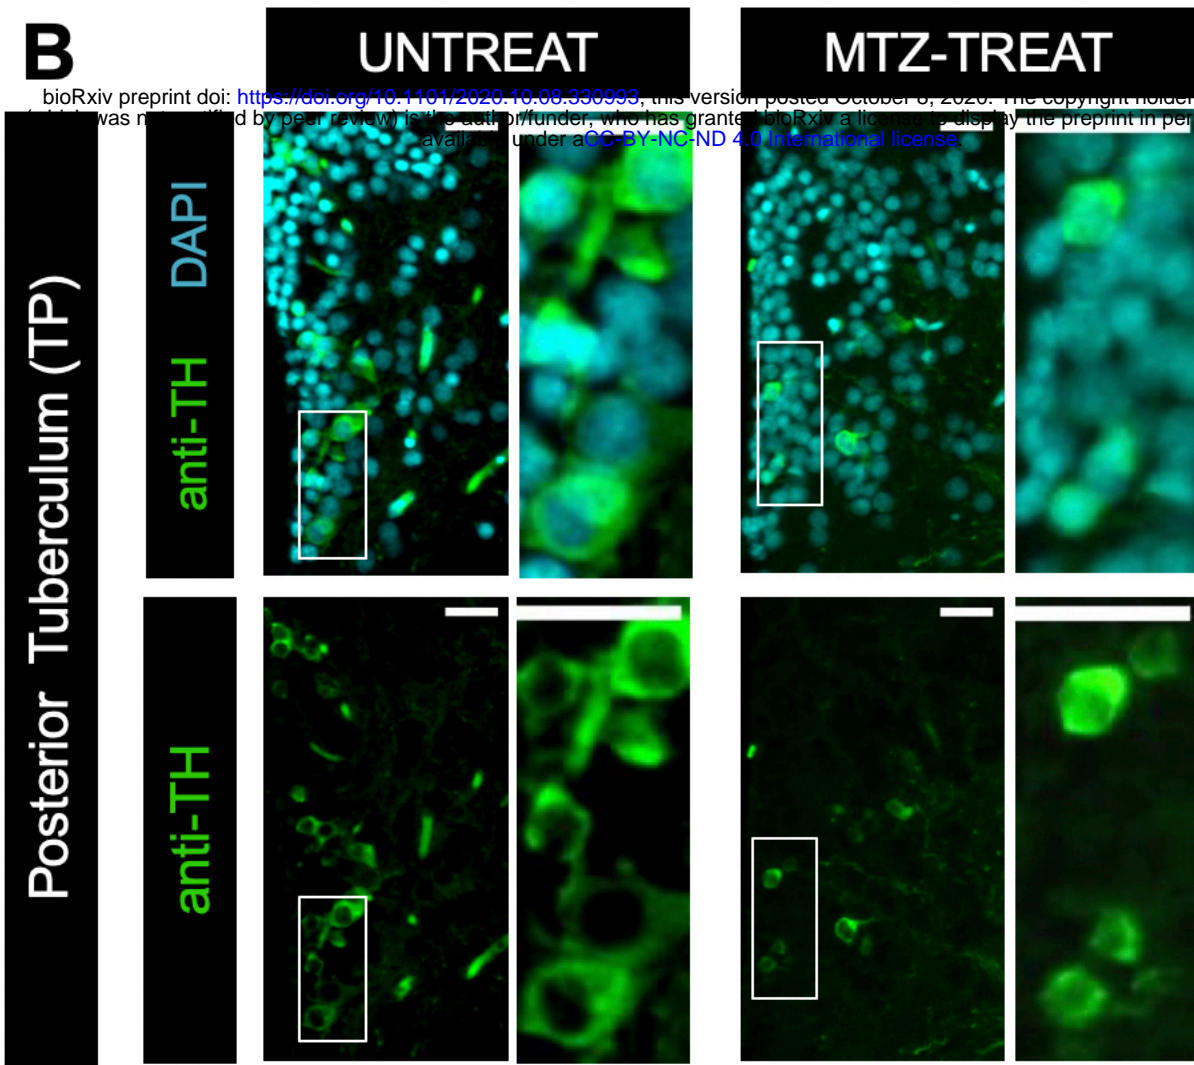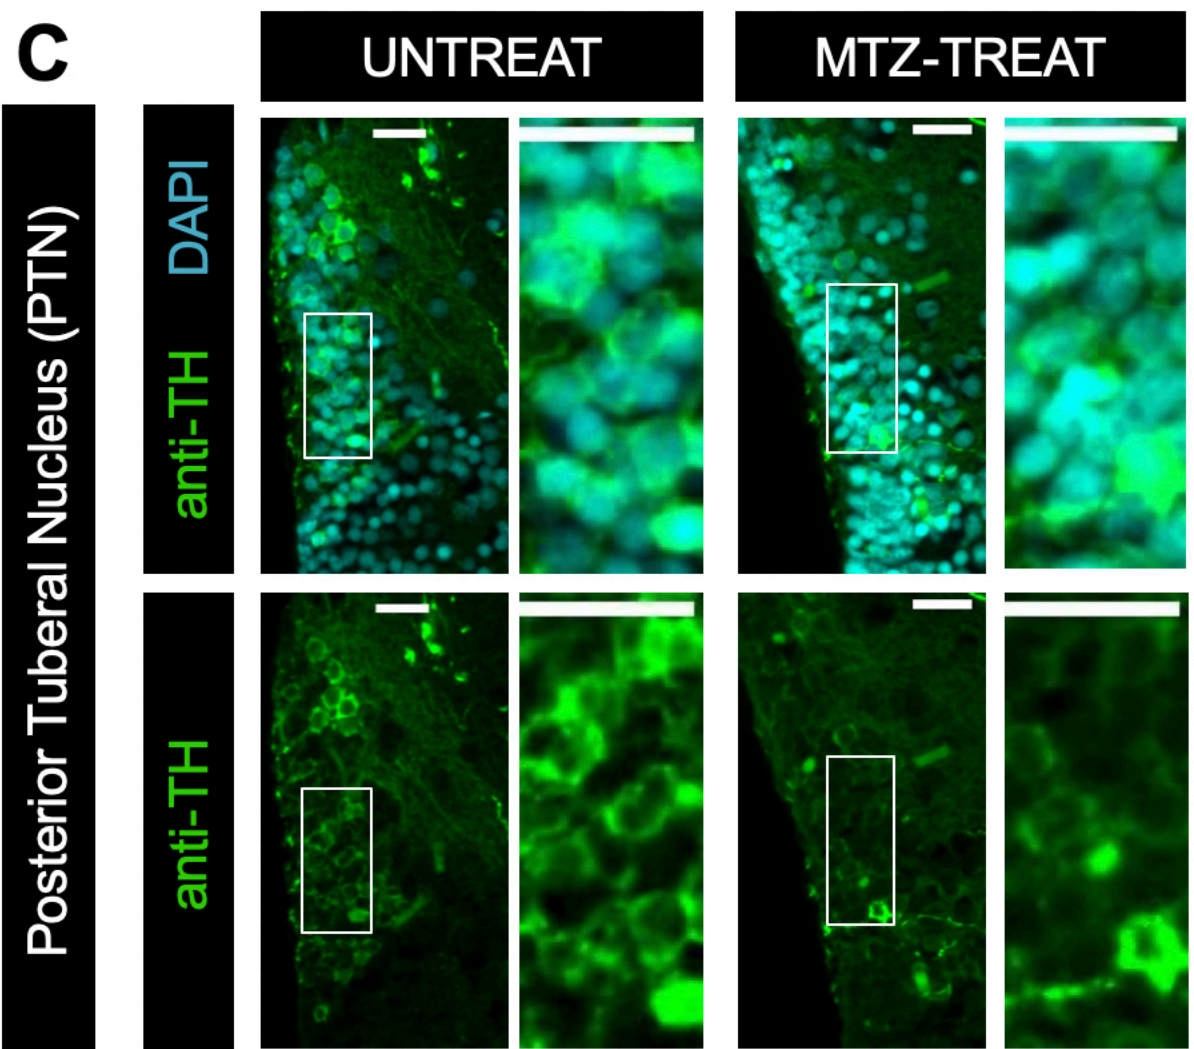

Fig. S4- related to Fig.3

**Figure S4. Related to Figure 3. Early-life OXT ablation affects the dopaminergic system.** Representative examples of the three adult brain TH-positive clusters that were altered by early OXT ablation (4-6 days-old MTZ treatment): (A) pretectal area, (B) posterior tuberculum and (C) posterior tuberal nucleus. Analyzed brain areas were identified by DAPI (cyan) and dopaminergic groups by TH (tyrosine hydroxylase) immunostaining (green). Scale: 20  $\mu$ m.



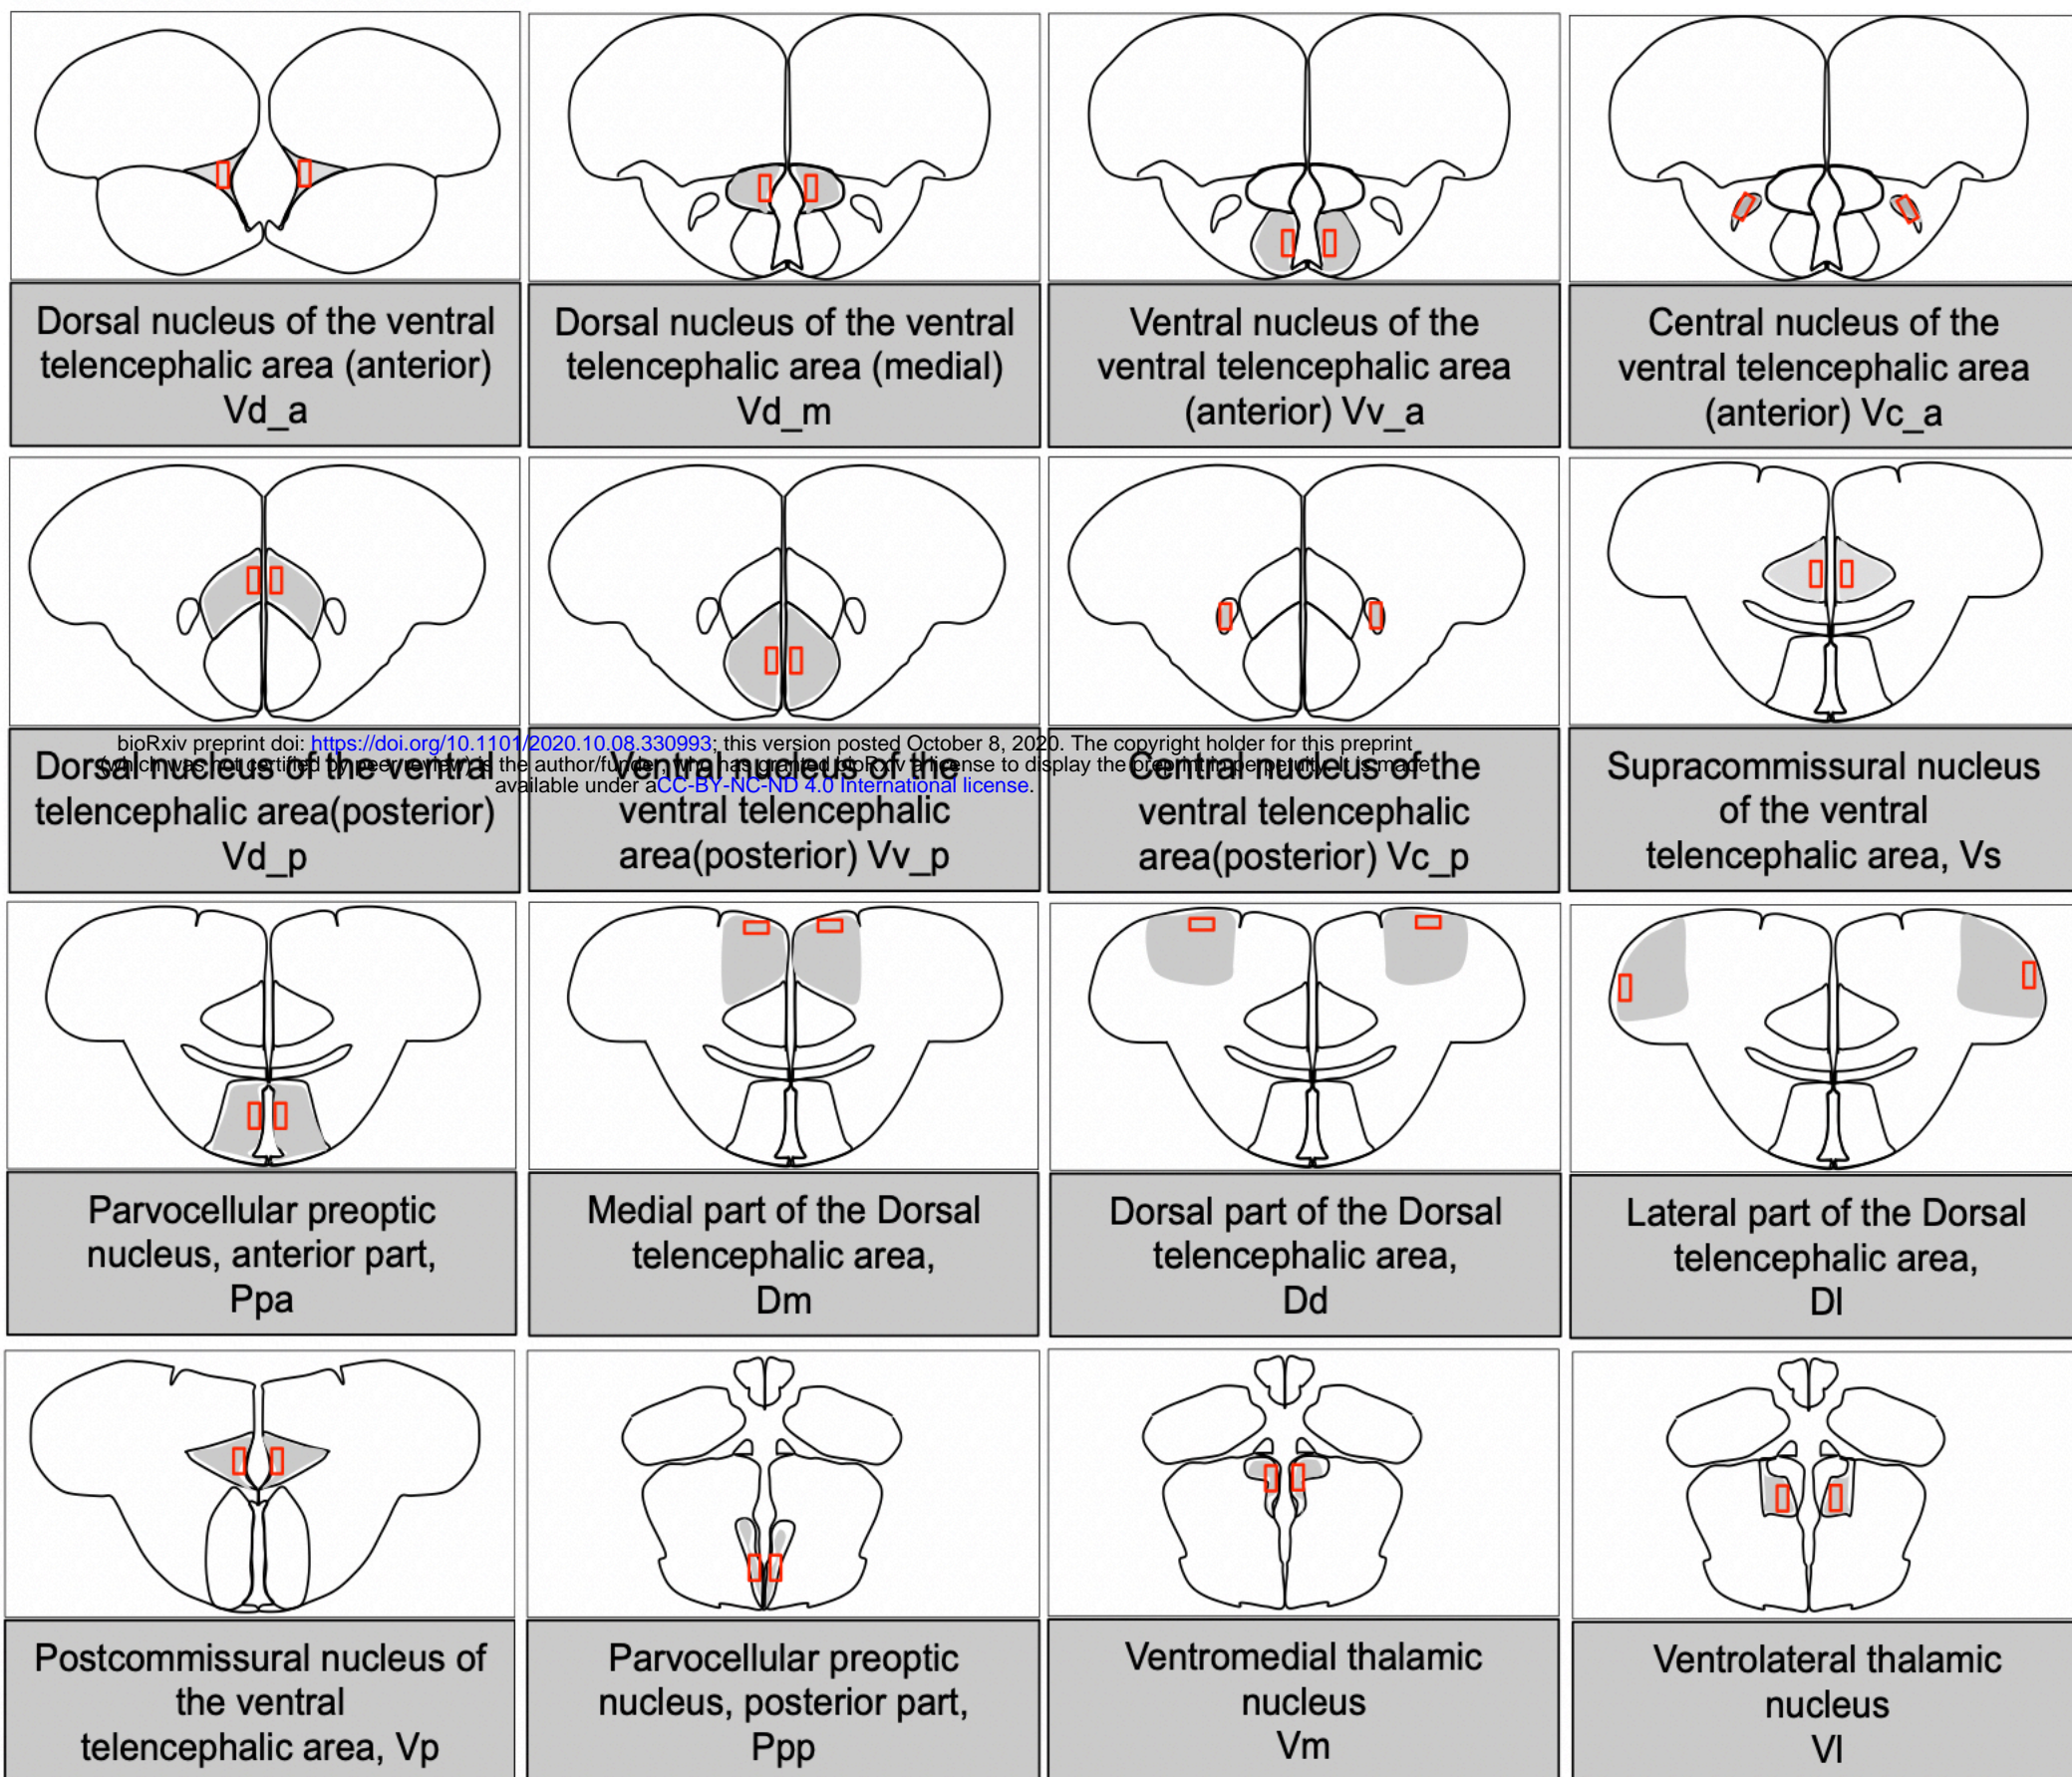

**Fig. S5- related to Fig.4**

**Figure S5. Related to Figure 4. Schematic representation of brain areas that were analyzed for neuronal activation in response to social stimulus.** pS6 immunostaining served as a readout of neuronal activation following MTZ treatment at 4-6 days-old or untreated adult fish to either a shoal of conspecifics or an empty tank. Included brain areas are part of the social decision-making network, subdivided into more anterior or posterior parts. Schematics are adapted from zebrafish atlas [70].

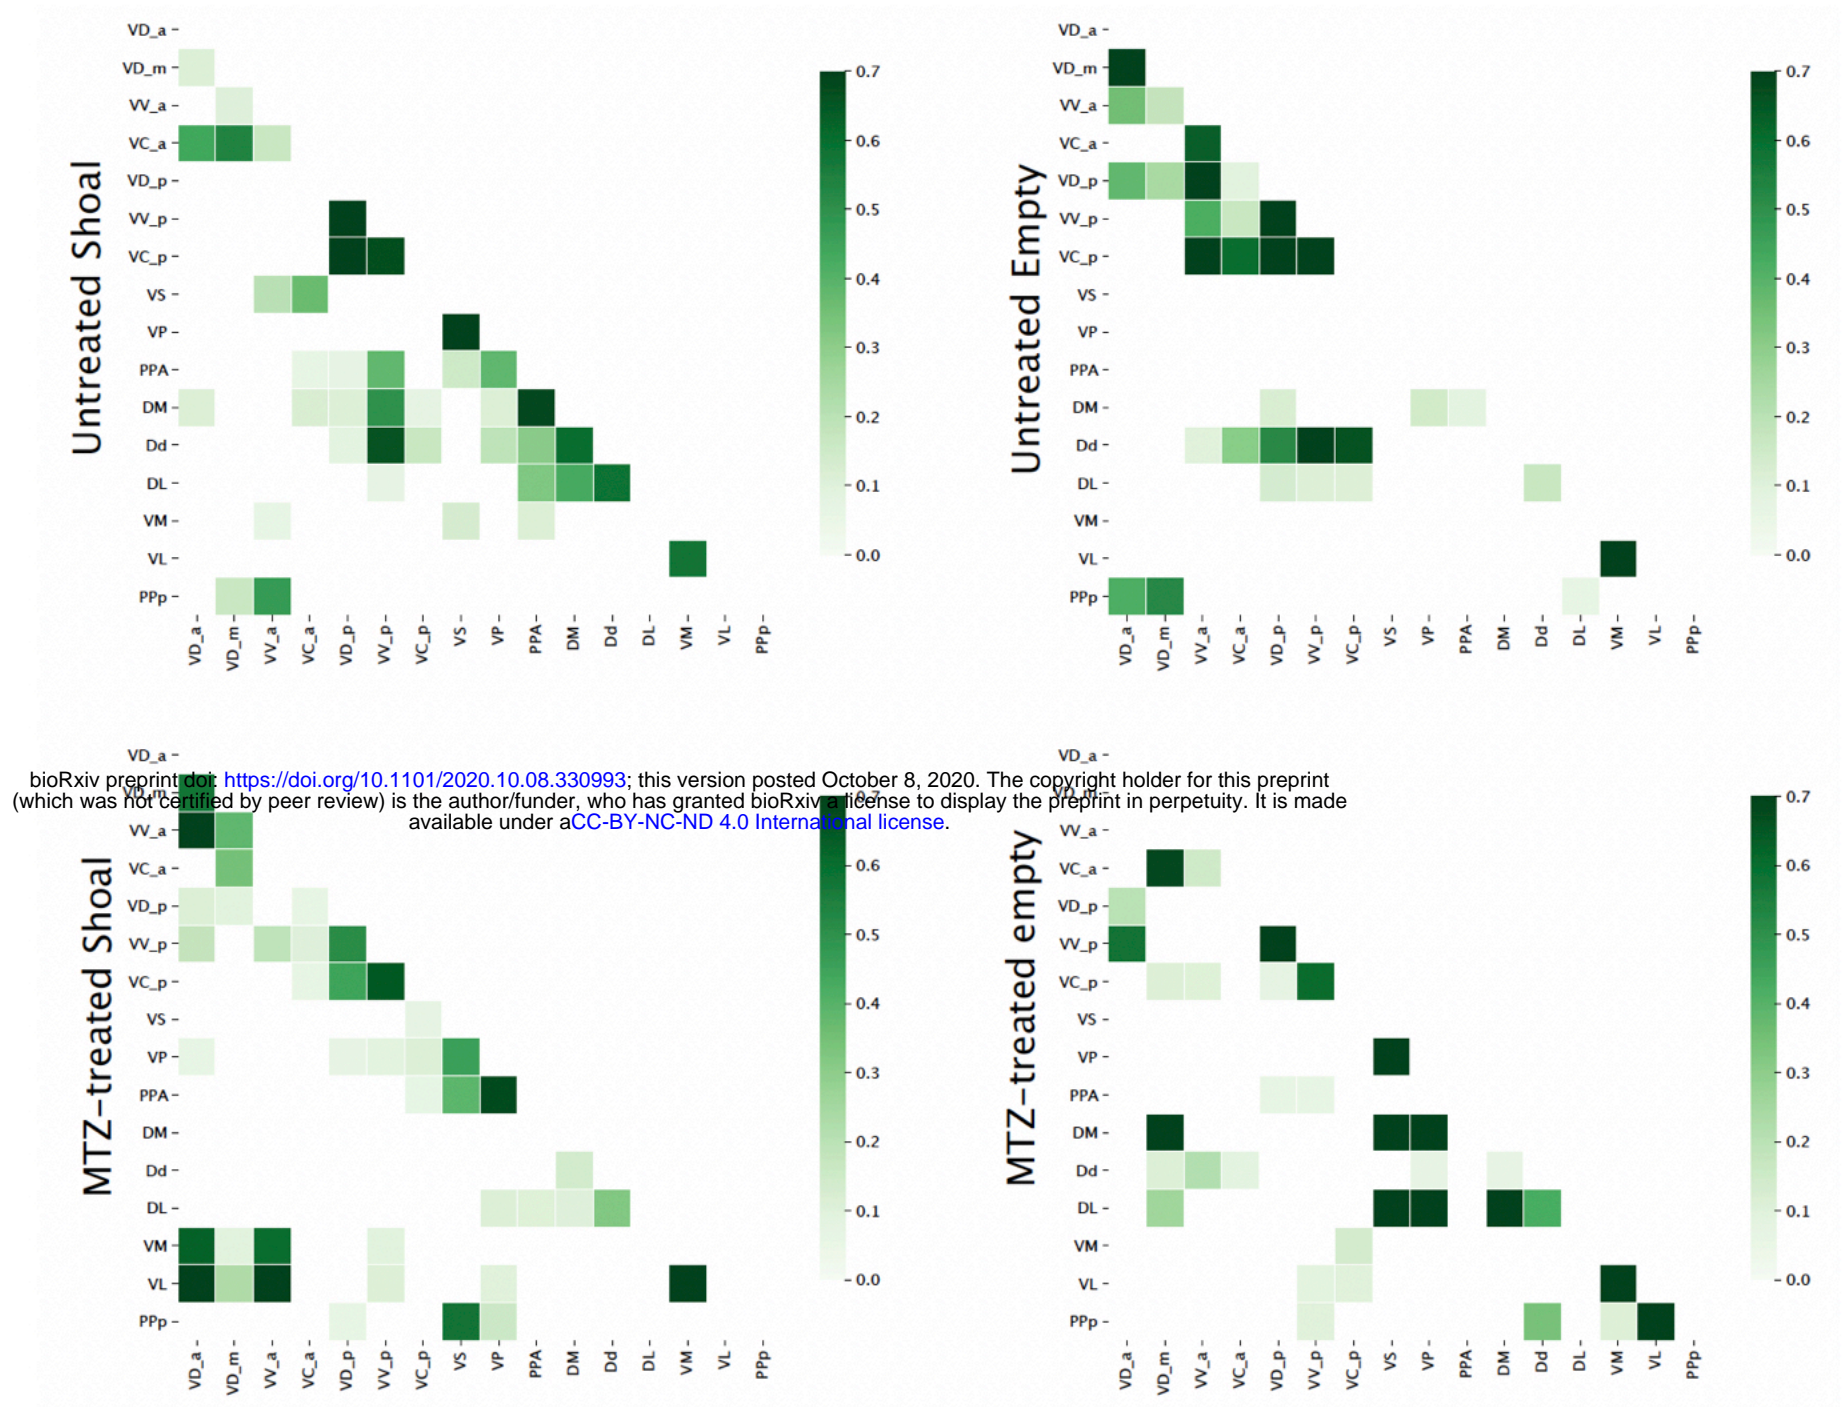

Fig. S6-Related to Fig.4

**Figure S6. Related to Figure 4. Correlation matrices of functional connectivity for the four treatments reveal early-life OXT shapes social information processing.** Regional correlation values are computed joining data from both hemispheres. Resampled correlations were kept if significant ( $p < 0.05$ ). For visualisation purposes, we show only entries of significant correlations higher than 0.05. Label legend: CE, untreated empty; CS, untreated shoal; AE, MTZ-treated empty; AS: MTZ-treated shoal.

## STAR METHODS

### KEY RESOURCES TABLE

| REAGENT or RESOURCE                                                           | SOURCE                                        | IDENTIFIER                                                                            |
|-------------------------------------------------------------------------------|-----------------------------------------------|---------------------------------------------------------------------------------------|
| <b>Antibodies</b>                                                             |                                               |                                                                                       |
| Rabbit monoclonal anti-phospho-S6 ribosomal protein (Ser235/236) (D57.2.2E)XP | Cell Signaling Technology                     | CAT# 1674858S                                                                         |
| Chicken polyclonal anti-GFP IgY Antibody Fraction                             | Life Technologies                             | CAT# A10262                                                                           |
| Mouse monoclonal anti-Tyrosine hydroxylase, clone LNC1                        | Merck Millipore                               | CAT# MAB318                                                                           |
| Rabbit polyclonal anti-GFP                                                    | ThermoFisher                                  | CAT# A-11122                                                                          |
| Guinea pig polyclonal anti-oxytocin                                           | Peninsula labs                                | CAT# T-5021                                                                           |
| Alexa 488 or 594 secondary antibodies                                         | Molecular Probes                              | CAT# A-11008, A-11001, A-11012                                                        |
| Fast red tablets                                                              | Roche                                         | CAT # 11496549001                                                                     |
| <b>Chemicals, Peptides, and Recombinant Proteins</b>                          |                                               |                                                                                       |
| Metronidazol Vetranal                                                         | Sial                                          | CAT#46461-250MG                                                                       |
| 2-Methyl-5-nitroimidazole-1-ethanol                                           | TCI Europe                                    | CAT#M0924-25G                                                                         |
| Metronidazol Veterinary preparation                                           | Vetmarket; POB- 960, Shoham, Israel           | CAT#165228                                                                            |
| Vectashield mounting medium with DAPI                                         | Vector Laboratories, Burlingame, CA           | CAT#H-1500                                                                            |
| EverBrite™ Hardset Mounting Medium                                            | Biotium                                       | CAT#23003                                                                             |
| Aqua-Polymount                                                                | Polysciences, Inc, Warrington, PA             | CAT#18606-20                                                                          |
| <b>Critical Commercial Assays</b>                                             |                                               |                                                                                       |
|                                                                               |                                               |                                                                                       |
| <b>Deposited Data</b>                                                         |                                               |                                                                                       |
|                                                                               |                                               |                                                                                       |
| <b>Experimental Models: Organisms/Strains</b>                                 |                                               |                                                                                       |
| Tg( <i>oxf:gal4</i> )wz06                                                     | (Anbalagan et al., 2018)[61]                  | ZDB-ALT-171113-2                                                                      |
| Tg(UAS:NTR-mCherry)c264                                                       | (Davison et al., 2007)[62]                    | ZDB-ALT-070316-1                                                                      |
| Tg( <i>oxf:EGFP</i> )wz01                                                     | (Blechman et al., 2011)[63]                   | ZDB-ALT-111103-1                                                                      |
| Tg(UAS:sypp-GFP)                                                              | (Meyer &Smith, 2006)[64]                      | ZDB-TGCONSTRCT-150601-1                                                               |
| <b>Software and Algorithms</b>                                                |                                               |                                                                                       |
| Ethovision XT 11.5                                                            | Noldus Technology                             | <a href="http://www.noldus.com/ethovision">www.noldus.com/ethovision</a>              |
| Imagej                                                                        | Schindelin, J. et al 2012 [65]                | <a href="http://imagej.nih.gov.ij/">http://imagej.nih.gov.ij/</a><br>RRID:SCR_003070  |
| GraphPad Prism version 6.0c                                                   | GraphPad software, San Diego, California, USA | <a href="http://www.graphpad.com">www.graphpad.com</a>                                |
| R                                                                             | R Development Core Team (2019).               | <a href="http://www.r-project.org/index.html">http://www.r-project.org/index.html</a> |
| <b>Others</b>                                                                 |                                               |                                                                                       |

|                                                                                                                                                                                        |               |  |
|----------------------------------------------------------------------------------------------------------------------------------------------------------------------------------------|---------------|--|
| Nikon High Content Screening microscope with a Andor Zyla 4.2 sCMOS camera, 100X 1.45 NA objective, DAPI + GFP fluorescence filtersets and controlled with the Nikon Elements software | Nikon         |  |
| Zeiss LSM 800 confocal scanning microscope with a 20X M27 Plan ApoChromat air objective. Pixel size was 0.156X0.156X0.96 $\mu\text{M}$ (x*y*z).                                        | Zeiss         |  |
| SlideScanner Zeiss AxioScan Z1                                                                                                                                                         | Zeiss         |  |
| High speed camera FLARE 2M360                                                                                                                                                          | Io Industries |  |
| B&W mini surveillance camera                                                                                                                                                           | Henelec 300B  |  |

## Experimental model

Zebrafish were raised and bred according to standard protocols. All experimental procedures were conducted in accordance with standard operating procedures of the Instituto Gulbenkian de Ciência and Direcção Geral de Alimentação e Veterinária (DGAV), Portugal, and Institutional Animal Care and Use Committee (IACUC) of the Weizmann Institute, Israel.

Zebrafish transgenic/mutant lines used in this study: Tg(*oxf*:EGFP)[63], Tg(*oxf*:gal4)wz06 [61], Tg(UAS:NTR-mCherry)c264 [62], Tg(UAS:sypb-EGFP) [64].

Larvae and adult zebrafish (3-6 months old) of both sexes were used in this work.

## Social affiliation assay

The social preference test followed the protocol described previously [10,22]. Briefly, focal zebrafish were given a choice between two side-by-side compartments: one containing a shoal (two males and two females) and an empty one (Figure 1A, B) during a 10-min test. The stimulus shoal matched the genotype of the focal fish. The stimulus compartment was randomly switched between tests, to control for any place preference possibly induced by the arena or laboratory frames. All compartments were completely sealed to block transmission of chemical and vibrational stimuli and thus, only visual cues were accessible. The experimental test tank was placed over a custom-built infrared LED light box, to increase image quality for subsequent automated video tracking. Fish behavior was recorded from above with either a high-speed camera FLARE (2M360, Io Industries) or a B&W mini surveillance camera (Henelec 300B) connected to a computer, using video recording software (Pinnacle Studio 12). Videos were analyzed with Ethovision XT11.0 (Noldus Inc., The Netherlands). Relevant data were then exported and further analyzed. The two regions of interest, empty and shoal, were defined as the 1/10 of the length of the arena immediately adjacent to the empty compartment or the compartment containing the stimulus shoal, respectively. The percentage of cumulative time fish spent these regions of interest ( $\%T_{\text{shoal}}$  and  $\%T_{\text{empty}}$ ) was used to calculate the social affiliation score [ $\%T_{\text{shoal}}/(\%T_{\text{shoal}} + \%T_{\text{empty}})$ ]. This score, also called the sociability score, has been commonly used in rodent studies to measure sociability in the 3-chamber test [33]. Total distance traveled was also measured.

**Ontogeny of social affiliation behavior:** Social preference was tested at different developmental stages: early larvae (12 days-old), mid larvae (14-20 days-old), post-flexion metalarvae (21-30 days-old), juveniles and adults (from 30 to 90 days-old). The size of the testing arena for early larvae was 3.5 x 6.0 cm; for mid larvae 7.0 x 8.0 cm; for metalarvae 7.0 x 10.0 cm; and for juveniles and adults it was 20.0 X 20.0 cm. The stimulus shoal matched the developmental stage of the focal fish. Two different experiments were performed: a) longitudinal, where individual fish were repeatedly tested at each developmental time point, and b) cross-sectional, where individual fish were tested only once, at a given developmental time point.

### **Chemo-genetic oxytocinergic ablation**

**Early ablation:** Nitroreductase (NTR)-mediated cellular chemo-genetic ablation was conducted as previously described[18,19]. Briefly, larvae (~30-40 per petri dish) were treated with metronidazole (MTZ, Vetranal CAT#46461, Sigma) dissolved in Danien's buffer to a final concentration of 10mM for 48 h while being protected from light, to prevent MTZ photoinactivation. After the first 24 h, the MTZ-containing Danien's buffer was replaced by fresh MTZ medium. Control untreated larvae were subjected to the same procedure in Danien's buffer without MTZ, but were also protected from light. After 48 h of treatment, larvae were washed out several times in Danien's buffer.

**Adult ablation:** We used a modified ablation protocol of 3X48 h MTZ treatments (5 mM), as we observed that this increased survival of adult animals. Briefly, adult zebrafish were placed into 2-liter tanks containing MTZ (Veterinary preparation, Vetmarket; Shoham, Israel, CAT#165228, or 2-methyl-5-nitroimidazole-1-ethanol, TCL Europe, CAT#M0924) dissolved in system water at a final concentration of 5 mM, protected from light. After ~16 h of treatment, zebrafish were moved to a tank containing fresh system water without MTZ, fed, and allowed to recover for ~2 h, followed by a second treatment of MTZ 5mM for 16 h. Animals were then allowed to recover in their home tanks for 48 h. The entire protocol was repeated three times.

**Effect of chemo-genetic oxytocinergic ablation on endogenous OXT cells.** Zebrafish treated with MTZ at different time points during development (4-6 days-old, 12-14 days-



old, 20-22 days-old or 90 days-old) were allowed to recover from treatment for 48 h and were then sacrificed to assess the treatment effects on endogenous OXT cells by *in situ* hybridization (see below) or by direct visualization of the mCherry transgene signal.

**Effect of chemo-genetic oxytocinergic ablation on adult social affiliation.** Zebrafish treated with MTZ at 4-6 days-old, 12-14 days-old, 20-22 days-old or 90 days-old were allowed to grow until adulthood to be tested for social affiliation behavior (see above).

**Effect of 4-6 days-old chemo-genetic oxytocinergic ablation on adult neuronal activity (pS6 activation).** To assess the effect of early OXT ablation on adult brain activation patterns in response to a social stimulus, adult zebrafish that had been treated with MTZ at 4-6 days-old and untreated controls were exposed individually to either a mixed-sex shoal of conspecifics or an empty tank for 10 min. Immediately after, we blocked the visual stimulus, without disturbing the focal fish, by placing an opaque partition between the experimental and stimulus tanks. After 50 min (to allow for expression of the pS6 neural activation marker), zebrafish were sacrificed and heads were collected and processed for paraffin slice immunofluorescence (see below).

**Effect of 4-6 days-old chemo-genetic oxytocinergic ablation on larvae and adult dopaminergic system.** Untreated and 4-6 days-old MTZ-treated zebrafish larvae were allowed to recover from treatment (48h) and were either processed immediately for whole-mount larvae TH immunofluorescence (see below) or allowed to grow until adulthood and then processed for paraffin slice TH-immunofluorescence (See below).

### **In situ hybridization**

RNA *in situ* hybridization was performed on both whole larvae and whole adult brains. Larvae or dissected brains were fixed in 4%PFA and *in situ* hybridization was performed as described in [22,66]. An OXT probe was generated using a pGEM plasmid encoding for *oxf* mRNA (RefSeq NM\_178291.2). Following development with Fast Red reagent (Roche, cat. No. 11496549001), adult brains were embedded in agar and sagittally cut at a thickness of 150µm on a vibratome, and whole larvae and brain slices were mounted in glycerol and imaged on a Zeiss LSM 800 scanning confocal microscope.

### **Whole-mount larvae immunofluorescence**

Briefly, larvae were euthanized in ice-cold water, transferred to 4% PFA and then incubated overnight at 4°C on a shaker. Then, the PFA was washed out and samples were placed in pre-cooled acetone in a freezer at -20°C for 10 min. The acetone was washed out (PBS 0.1% TritonX-100), and the samples were then incubated in blocking solution (PBS 0.1% triton + 1% DMSO + 1% BSA + 5% NGS) for minimum of 2 h at room temperature (RT), followed by incubation with primary antibody overnight at 4°C on a shaker. Primary antibodies used were either mouse anti-TH (MAB 318, Merck Millipore), rabbit anti-EGFP (A11122, ThermoFisher) or guinea pig anti-OXT (T-5021, Peninsula labs), at a concentration of 1:200. Next, samples were washed repeatedly (minimum of 6X15 min washes) with blocking solution and then placed in a blocking solution containing fluorescent secondary antibody overnight at 4°C on a shaker. Then, samples were washed in PBS, mounted dorsally on a slide in mounting medium (Aqua-Polymount, Polysciences Inc., Warrington PA, CAT# 18606-20) and imaged by a Zeiss LSM 800 scanning confocal microscope.

### **Paraffin adult brain slice immunofluorescence**

Zebrafish heads were fixed in 10% buffered formalin for 72 h and decalcified in EDTA (0.5 M, pH 8.0) for 48 h, followed by paraffin inclusion. Coronal slices (6 µm-thick) were cut with a microtome. Sectioned slices were then processed for immunofluorescence. After antigen retrieval with Tris-EDTA (10 mM Tris Base, 1 mM EDTA, 0.05% Tween20) at 95°C for 20 min, slices were washed in TBS-Tx (TBS 0.025% TritonX-100, 3X10 min), then incubated with blocking solution (TBS 0.025% TritonX-100 + 1%BSA) for 1 h at RT, followed by an overnight incubation with a primary antibody (1:400 at 4°C). Slides were then washed in TBS- 0.025% TritonX-100 (3X10 min) and incubated in secondary antibody (1:1000 for 2 h). After washes, slices were incubated with DAPI for 20 min, then rinsed in TBS and mounted with EverBrite™ Hardset Mounting medium (Biotium). Primary antibodies used were anti-phosphorylation of S6 ribosomal protein, pS6 (Cell signaling S235/236) and anti-tyrosine hydroxylase, anti-TH, (mouse monoclonal, MAB 318, Merck Millipore).

## Neuronal quantifications

### Neuronal pS6 cell quantification

Coronal slices were acquired with a commercial Nikon High Content Screening microscope, based on Nilon Ti equipped with a Andor Zyla 4.2 sCMOS camera, using a 20X 0.75 NA objective, quadruple dichroic filter, and controlled with the Nikon Elements software. To avoid double-imaging of the same cells, we imaged every other slice alternately. We quantified density of pS6-positive cells in 16 brain areas that belong to the social decision making network [39]: Vv- ventral nucleus of the ventral telencephalic area (V), homologous to the mammalian lateral septum, subdivided into: anterior (Vv\_a) and posterior (Vv\_p); Vd- dorsal nucleus of V, homologous to the mammalian Nacc, subdivided into: anterior (Vd\_a), medial (Vd\_m) and posterior (Vd\_p); Vc- central nucleus of V, homologous to the mammalian striatum, subdivided into: anterior (Vc\_a) and posterior (Vc\_p); Dm- medial zone of the dorsal telencephalic area (D), homologous to the mammalian bLAMY; Dl- lateral zone of D, homologous to hippocampus; Dd- dorsal zone of D; Vs- supracommissural nucleus of V, homologous to the mammalian extended amygdala (BNST and meAMY); Vp- postcommissural nucleus of V; Ppa- parvocellular preoptic nucleus, anterior part and Ppp- parvocellular preoptic nucleus, posterior part, both homologous to the mammalian preoptic area; VM- ventromedial thalamic nucleus; VL-ventrolateral thalamic nucleus (Figure S3, related to Figure 3).

For each brain area, about five coronal brain slices were analyzed manually using imageJ software [65]. Background subtraction and linear adjustments of brightness and contrast levels were performed in the same way for all groups. The brain areas of interest were identified using DAPI to define neuroanatomical boundaries and landmarks identified in the Zebrafish Atlas [41]. In each brain slice, we placed one square of 1000  $\mu\text{m}^2$  in the brain region of interest, in each hemisphere, following these criteria: the square was always placed over the highest number of pS6-positive cells, keeping minimum distance from the border and edge of the brain section, a similar strategy that has been used by others [67]. pS6-positive cells were counted if a nucleus surrounded by the cytoplasm was clearly visible, and if the intensity of the pS6 signal was perceptibly greater than background (see Figure 3 and Figure S2B, related to Figure 3, for examples of pS6 staining in the sampled brain areas). To compare neuronal activation between treatments

and stimuli, we used a Generalized Linear Mixed Model (GLMM) with a Poisson distribution using the brain identification number as the mixed effect in the statistical model, followed by planned comparisons, since we target areas that are known to belong to the social decision-making network. We analyzed the 16 brain areas independently and corrected the p-values of the planned comparison with the false discovery rate (FDR) adjustment method.

### **Dopaminergic neuronal quantification**

Dopaminergic quantification was performed in both larvae and adult zebrafish, either 4-6 days-old MTZ-treated or untreated. Briefly, for larvae, whole-mount zebrafish immunofluorescence was performed as described above using primary antibody anti-TH (MAB 318, Merck Millipore). Larvae were imaged and confocal z-stacks were analyzed by ImageJ. Larva dopaminergic forebrain, pretectum and posterior tuberculum nucleus were identified accordingly to [68,69] and TH<sup>+</sup> cells were counted in these three groups. To compare dopaminergic cell numbers between treatments, and since the data were normally distributed, we used a Linear Model (LM) to analyze each brain area independently (Table S5).

For adults, heads from both treatment groups (untreated and 4-6 days-old MTZ-treated) were collected and processed for paraffin embedding, followed by paraffin slice immunofluorescence as described above. Coronal slices were acquired with a SlideScanner Zeiss AxioScan Z1 (Zeiss), and analyzed with Zeiss Zen Lite software. To avoid double-imaging of the same cells, we imaged every other slice alternately. Boundaries separating brain nuclei and subdivisions were identified based on DAPI staining, using as reference a coronal atlas of the zebrafish [70]. Dopaminergic cells were marked and counted if a nucleus surrounded by the cytoplasm was clearly visible, and if intensity of TH staining was perceptibly greater than background (see Figure S5, related to Figure 4, for examples of TH staining in the sampled brain areas).

Dopaminergic nuclei (TH<sup>+</sup>) groups were identified according to [30,59,60]. We counted TH<sup>+</sup> cells in the following clusters: the subpallium area (extending from the rostroventral telencephalon to the dorsocaudal telencephalon, also identified by G2 by Panula and colleagues [60]), which included a TH cluster containing VV, Vc and VI, and in-between

areas, a TH cluster including Vd and the lateral area outside the Vd, and a TH cluster within the Vs (identified by the anterior commissure) and lateral area outside the Vs; TH clusters in the PPa area were divided in two: a more anterior (close to the border of the diencephalon, lateral margin of the ventricle, G3) and a more extending area in the medial area of the PPa (ventral part of the PPa, G4); a TH cluster in the pretectum (PPr, G7); in the ventromedial and ventrolateral nucleus (Vm, VI, G6); a TH cluster in the periventricular nucleus of the posterior tuberculum (TP/TPp, small cells, ventral to the central posterior thalamic nucleus (CP), G11) and in the posterior tuberal nucleus (PTN, G12) (Figure S5, related to Figure 4). Similar to pS6 neuronal quantification described above, we manually analyzed five coronal brain slices for each cluster, in each brain hemisphere, placing one square of 1000  $\mu\text{m}^2$  in the brain region of interest with the highest density of cells. To compare dopaminergic cell numbers between treatments, we used GLMM with a Poisson distribution followed by planned comparisons, and analyzed the eight brain areas independently, correcting the p-values with the FDR adjustment method.

### **Neuronal activity analysis**

Generalized Linear Mixed Models (GLMM) with a Poisson regression followed by planned comparisons were used to compare adult neuronal activation (pS6<sup>+</sup> cell number) between treatments (4-6 days-old MTZ-treatment vs. untreated) and stimuli (shoal of conspecifics vs. empty). We counted pS6 positive cells in 16 brain areas (FigureS3 related to Figure3) and for each area we sampled up to 5 squares of 1000  $\mu\text{m}^2$  per brain. Because this generated pseudo-replication of brain numbers, we used the brain ID as a mixed effect in the statistical model. We analyzed the 16 brain areas independently and corrected the p-values of the planned comparisons with the FDR adjustment method (Table S3). To compare neuronal cell number activation between treatments and stimuli, we used a Generalized Linear Mixed Models (GLMM) with a Poisson distribution using the brain identification number as the mixed effect in the statistical model, followed by planned comparisons, since we target areas that are known to belong to the social decision-making network. We analyzed the 16 brain areas independently and corrected the p-values of the planned comparison with the fdr adjustment method.

## Network reconstruction.

To test for functional connectivity of early MTZ-treated vs untreated brains exposed to social stimuli, we reconstructed Pearson correlation matrices using a resampling procedure, similar to the Quadratic Assignment Procedure (QAP). Instead of defining a single network, we construct the set of possible networks obtained leaving out some of the specimens' information. More precisely, consider the case of  $M$  specimens, each with an associated expression vector  $x_i \in \mathbb{R}^N$ , where  $N$  is the number of brain regions. For a given  $m < M$ , we consider all the  $\binom{M}{m}$  combinations  $\Omega_Y$  of  $m$  specimens and compute the corresponding functional graphs. We refer to the collection of graphs obtained in this way as a graph tower  $\Omega_T$ , where each of the combinations can be considered as a graph layer. The advantage of this construction is that each layer in the graph tower represents a different instance of the network bootstrapping. In this way, observables computable on a single layer can be bootstrapped across multiple ones. The construction has naturally one parameter, the sampling number  $m$ , which needs to be chosen on the basis of data-driven considerations. In our experiments, robustness analysis shows that results are robust for  $m$  values between 10 and 15. To obtain sparse functional connectivity matrices, we threshold each instance following [71] at a density threshold of  $\rho = 0.2$ , which also corresponds to the minimum network heterogeneity across instances. After thresholding, for each treatment we average the thresholded instances to obtain a single matrix per treatment, which we use in the following analysis.

## Detection of robust functional modules.

Communities were computed using the Leiden community detection method [44] on the averaged treatment matrices. To increase the robustness of the detection, for each condition, we repeat the community detection 400 times. From the 400 candidate partitions we extract the central partition as described in [45] and associate the resulting central partition to the treatment under analysis. To quantitatively characterize differences among partitions, we measure the ratio  $r$  of total edge weights within a community with that of the edges between communities. More specifically, for a partition  $\mathcal{P}$  with  $s$  communities we compute the  $s \times s$  matrix  $P$ , defined as

$$P_{\alpha\beta} = \sum_{i \in \alpha, j \in \beta} \omega_{ij}$$

Where  $\alpha, \beta = 0, \dots, m - 1$  label the modules of  $\mathcal{P}$  and  $\omega_{ij}$  is the edge weight between regions  $i$  and  $j$ . We then compute the ratio of average intra-community to inter-community edge weights as follows:

$$r = \frac{(m - 1) \sum_{\alpha} P_{\alpha\alpha}}{2 \sum_{\alpha \neq \beta} P_{\alpha\beta}} = \frac{(m - 1) \text{Tr}P}{2 (|P|_1 - \text{Tr}P)}$$

which measures the ratio of the average weight on the diagonal of  $P_{\alpha\beta}$  to the average diagonal weight. To assess significance of  $r$  values and of differences between them, we employ a permutation test based on permutating the community labels while preserving the size of the considered communities. We find that all  $r$  values are significantly different from zero, and so are also the differences in  $r$  between treatments ( $p < 0.01$ ).

### **Strength centrality.**

As a measure of local integration, we computed also the strength centralities. The first encodes how strongly a node links to its neighbors. while the second total measures how influential a node is at the network level on the basis of its direct connections and how well connected its neighbors are. In Table XX we report the nodes ranked in decreasing order of strength (weighted degree) centrality.

### **Behavioral statistical analysis**

Data are represented as mean  $\pm$  standard error of the mean (SEM). Normality of the data was tested by D'Agostino and Pearson omnibus normality test and Shapiro-Wilk normality tests. When parametric assumptions were verified, we used parametric statistics; otherwise we used equivalent non-parametric tests.

Significance was denoted as  $p < 0.05$ , and  $p$ -values refer to two-tailed tests, unless otherwise noted. The use of one-tailed tests was justified by a priori directionality hypotheses in the following cases:

- Effect of MTZ treatment on OXT mRNA and NTR-mCherry transgene expression (Figure 2 and FigureS1), since in our system, we expected that MTZ would ablate the NTR-oxytocinergic expressing neurons;
- Effect of MTZ treatment (oxytocinergic ablation) on social affiliation behavior in fish expressing the NTR transgene, and thus causing OXT ablation, since OXT is well known to regulate social behaviors and thus, we expected that oxytocinergic ablation would lead to a decreased social behavior in zebrafish.

One sample *t*-tests were used to verify if social affiliation during development was statistically different from chance (0.5). We used Mann-Whitney tests to compare the effect of MTZ treatment on OXT mRNA, on the expression of the NTR-mCherry transgene, and to compare the adult social affiliation score between untreated and MTZ-treated groups at different developmental time points (4-6 days-old, 12-14 days-old, 22-24 days-old and 90 days-old MTZ-treatment).

Because we tested eight independent cohorts for the effect of MTZ-treatment at 4-6 days-old time point (by different researchers in two different laboratories), the total sample size for this time point ( $n=210$ ) was much larger than for the other time points (12-14 days-old:  $n=28$ , 22-24 days-old,  $n=19$ ; adult:  $n=13$ ). Taking into account all eight cohorts together, the adult social affiliation score of the 4-6 days-old MTZ-treated fish were significantly decreased from untreated siblings ( $p=0.0012$ , Mann-Whitney test,  $n=112$  untreated vs. 98 MTZ-treated fish). However, a Generalized Linear Model (GLM) with beta regression and planned comparisons, which was used to compare the effect of MTZ treatment on adult social affiliation score of the eight different cohorts (FigureS1 related to Figure2), revealed not only an effect of the MTZ treatment ( $F_1=9.486$ ,  $p=0.0021$ ) but also variation among cohorts ( $F_7=2.719$ ,  $p=0.0081$ ). We therefore performed a Monte Carlo simulation for a sample size of 30 individuals, 15 individuals from each group (untreated and 4-6 days-old MTZ treated) with 1000 iterations. This simulation, ensured a more comparable sample size for the 4-6 days-old time point treatment relative to other time-point treatments. . Moreover, it ensured a more representative sample than each cohort independently or the total eight-cohort population. We obtained a Monte Carlo *p*-value of  $p<0.001$  (Figure 2E), which means that there was a significantly higher number of simulations in which the social affiliation score of the untreated group was greater than



the social affiliation score of the MTZ-treated group, as compared to the number of simulations with the inverse trend, for a sample size of 15 individuals, across all eight cohorts. It was calculated as the mean social affiliation score of the 1000 iterations for untreated fish divided by the mean scores of the 1000 iterations for treated fish divided by 1000.

To determine whether the difference in social affiliation score between untreated and 4-6 days-old MTZ-treated fish was due to OXT ablation and not movement impairments caused by MTZ, we used a Linear Model (LM) to compare the total distance moved (square root transformed) of both groups in the eight independent cohorts. Both GLM with beta regression on adult social affiliation score and LM on total distance moved (square root transformed) were also applied to different control cohort fish not expressing NTR transgene (FigureS2-Related to Figure2).

LM was performed to assess the effect of 4-6 days-old MTZ-treatment in total TH counts of three distinct TH clusters in 8 days-old larvae (Figure4 and Table S5). The effect of 4-6 days-old MTZ treatment on adult dopaminergic system was also assessed with a GLMM with a Poisson regression followed by planned comparisons, comparing the number of TH-positive cells sampled in five squares of 1000  $\mu\text{m}^2$  per TH cluster in 8 different adult brain TH clusters. All eight areas were analyzed independently and p-values of the planned comparisons were corrected with the fdr adjustment method (Figure4 and Table S6).

Graphical representations of the data were performed in GraphPad Prism 6.0c software. Shapiro-Wilk normality test, one-sample *t*-test and *t*-tests were performed in GraphPad Prism, and the remaining tests were performed in R programming software, version 3.6.3 (R Core Team 2020)[72] with the following packages: lme4[73] and afex[74] (for GLMM with Poisson regression), betareg (for GLMM with beta regression), emmeans (for planned comparisons)[75], and the base R package (for LM regression and Monte Carlo simulations)[72].

## List of Supplementary tables

**Table S1.** Effect of 4-6 days-old MTZ treatment on adult social affiliation and total distance moved in eight independent cohorts of zebrafish expressing the *oxt:ntr* transgene.

**Table S2.** Effect of 4-6 days-old MTZ treatment on adult social affiliation and total distance moved in control zebrafish not expressing the transgene NTR.

**Table S3.** Effect of 4-6 days-old MTZ-treatment in TH cell clusters of larvae zebrafish brain.

**Table S4.** Effect of 4-6 days-old MTZ-treatment in TH cell clusters of adult zebrafish brain.

**Table S5.** Effect of 4-6 days-old MTZ treatment on adult neuronal activation.

**Table S6.** Rank of node strength centralities.

**Table S1. Effects of 4-6 days-old MTZ treatment in adult social affiliation and total distance moved on eight independent experimental cohorts tested**

| <b>Social affiliation behavior (GLM)</b> |       |       |         |  |           |
|------------------------------------------|-------|-------|---------|--|-----------|
|                                          | d.f.1 | d.f.2 | F.ratio |  | p.value   |
| Cohort                                   | 7     | inf   | 2.719   |  | 0.0081**  |
| Treatment                                | 1     | inf   | 9.486   |  | 0.00105** |
| Cohort:Treatment                         | 7     | inf   | 1.388   |  | 0.2053    |

  

| <b>Total Distance moved (LM)</b> |     |        |         |         |              |
|----------------------------------|-----|--------|---------|---------|--------------|
|                                  | Df  | Sum Sq | Mean Sq | F value | Pr(>F)       |
| Cohort                           | 7   | 17444  | 2492.03 | 15.2007 | 8.342e-16*** |
| Treatment                        | 1   | 30     | 30.22   | 0.1843  | 0.6681       |
| Cohort:<br>Treatment             | 7   | 838    | 119.67  | 0.7299  | 0.6468       |
| Residuals                        | 195 | 31969  | 163.94  |         |              |

Summary of results of the GLM (Generalized Linear Model) with beta regression and LM (Linear Model) models to analyse the effects of early (4-6 days-old) MTZ-treatment on adult social affiliation and total distance moved on eight independent experimental cohorts expressing the NTR transgene. A one-tailed p-value was considered for the effect of MTZ-treatment on social affiliation behaviour because of our a priori directionality hypothesis (see Methods/Statistic section).

**Table S.2. Effects of 4-6 days-old MTZ-treatment in adult social affiliation and total distance moved on control fish not expressing the NTR transgene**

| <b>Social affiliation behavior (GLM)</b> |       |         |         |           |           |
|------------------------------------------|-------|---------|---------|-----------|-----------|
|                                          | d.f.1 | d.f.2   | F.ratio | p.value   |           |
| Cohort                                   | 3     | inf     | 7.249   | 0.0001*** |           |
| Treatment                                | 1     | inf     | 1.241   | 0.2653    |           |
| Cohort:Treatment                         | 3     | inf     | 1.271   | 0.2822    |           |
| <b>Total Distance moved (LM)</b>         |       |         |         |           |           |
|                                          | Df    | Sum Sq  | Mean Sq | F value   | Pr(>F)    |
| Cohort                                   | 3     | 15614.2 | 5204.7  | 58.5513   | <2e-16*** |
| Treatment                                | 1     | 183.3   | 183.3   | 2.0615    | 0.1536    |
| Cohort:<br>Treatment                     | 3     | 352.1   | 117.4   | 1.3203    | 0.2710    |
| Residuals                                | 121   | 10755.9 | 88.9    |           |           |

Summary of results of the GLM with beta regression and LM models to analyse the effects of early (4-6 days-old) MTZ-treatment on adult social affiliation and total distance moved on control fish not expressing the NTR transgene.

bioRxiv preprint doi: <https://doi.org/10.1101/2020.10.08.330993>; this version posted October 8, 2020. The copyright holder for this preprint (which was not certified by peer review) is the author/funder, who has granted bioRxiv a license to display the preprint in perpetuity. It is made available under aCC-BY-NC-ND 4.0 International license.

**Table S3. Effect of 4-6 days-old MTZ-treatment in TH cell clusters of larvae zebrafish brain.** Three independent brain areas were analyzed. Linear model with post-hoc tests comparing the treatment (early MTZ-treated vs. untreated) were performed.

| <b>BA</b>      | <b>Treat1</b> | <b>Treat2</b> | <b>estim</b> | <b>SE</b> | <b>z.ratio</b> | <b>p.value</b> |
|----------------|---------------|---------------|--------------|-----------|----------------|----------------|
| Subpallium     | Untreated     | MTZ-Treated   | -2.889       | 2.622     | -1.102         | 0.278          |
| PrT            | Untreated     | MTZ-Treated   | -8.278       | 2.994     | -2.764         | 0.009 **       |
| PT Large cells | Untreated     | MTZ-Treated   | -1.722       | 0.566     | -3.042         | 0.0045**       |

*BA*, Brain area; *Treat*, Treatment; *estim*, estimate; *PrT*, Pretectum; *TP*, Posterior Tuberculum.

bioRxiv preprint doi: <https://doi.org/10.1101/2020.10.08.330993>; this version posted October 8, 2020. The copyright holder for this preprint (which was not certified by peer review) is the author/funder, who has granted bioRxiv a license to display the preprint in perpetuity. It is made available under aCC-BY-NC-ND 4.0 International license.

**Table S4. Effect of 4-6 days-old MTZ-treatment in TH cell clusters of adult zebrafish brain.** Eight independent brain areas were analyzed. GLMM with a Poisson regression and planned comparisons (early MTZ-Treated vs. Untreated) was performed. *p*-values from planned comparisons were corrected with false discovery rate (fdr) adjustment method.

| BA              | Treat1    | Treat2      | estim  | SE     | z.ratio | <i>p</i> .value.<br>indep.<br>GLMM | <i>p</i> .value.<br>indep. GLMM.<br>fdr correction |
|-----------------|-----------|-------------|--------|--------|---------|------------------------------------|----------------------------------------------------|
| Subpallium (G2) | Untreated | MTZ-Treated | -0.031 | 0.0562 | -0.552  | 0.5813                             | 0.6643                                             |
| PPa (G3)        | Untreated | MTZ-Treated | 0.185  | 0.175  | 1.058   | 0.2901                             | 0.3868                                             |
| PPa (G4)        | Untreated | MTZ-Treated | 0.0611 | 0.0533 | 1.147   | 0.2513                             | 0.3868                                             |
| PPp (G5)        | Untreated | MTZ-Treated | 0.12   | 0.0747 | 1.603   | 0.1090                             | 0.218                                              |
| Vm + VI (G6)    | Untreated | MTZ-Treated | 0.0143 | 0.0755 | 0.189   | 0.8502                             | 0.8502                                             |
| PrT (G7)        | Untreated | MTZ-Treated | 0.201  | 0.0598 | 3.364   | <b>0.0008</b>                      | <b>0.0048**</b>                                    |
| TP (G11)        | Untreated | MTZ-Treated | 0.188  | 0.0724 | 2.597   | <b>0.0094</b>                      | <b>0.0251*</b>                                     |
| PTN (G12)       | Untreated | MTZ-Treated | 0.19   | 0.0586 | 3.239   | <b>0.0012</b>                      | <b>0.0048**</b>                                    |

*BA*, Brain area; *Treat*, Treatment; *estim*, estimate; *GLMM*, Generalized Linear Mixed Models; *fdr*, false discovery rate; *PPa*, anterior part of the parvocellular preoptic nucleus; *PPp*, posterior part of the Parvocellular preoptic nucleus; *Vm*, ventromedial thalamic nucleus; *VI*, ventrolateral thalamic nucleus; *PrT*, Pretectum nucleus; *TP*, Posterior tuberculum nucleus; *PTN*, Posterior Tuberal nucleus.

bioRxiv preprint doi: <https://doi.org/10.1101/2020.10.08.330993>; this version posted October 8, 2020. The copyright holder for this preprint (which was not certified by peer review) is the author/funder, who has granted bioRxiv a license to display the preprint in perpetuity. It is made available under aCC-BY-NC-ND 4.0 International license.

**Table S5. Effect of 4-6 days-old MIZ-treatment on adult neuronal activation. Neuronal activation measured by pS6 immunostaining. Sixteen (16) independently brain areas were analyzed. GLMM with a Poisson regression and planned comparisons were performed. *p*-values of the planned comparisons were corrected with false discovery rate (fdr) adjustment method (significant values in red).**

| BA1        | Stim1        | Treat1       | BA2        | Stim2        | Treat2     | estim          | SE            | z.ratio      | <i>p</i> .value.<br>indep.<br>GLMM | <i>p</i> .value.<br>indep. GLMM.<br>fdr correction |
|------------|--------------|--------------|------------|--------------|------------|----------------|---------------|--------------|------------------------------------|----------------------------------------------------|
| Dd         | EMPTY        | CTR          | Dd         | SHOAL        | CTR        | -0.2076        | 0.125         | -1.655       | 0.0978                             | 0.4084                                             |
| Dd         | EMPTY        | ABLAT        | Dd         | EMPTY        | CTR        | -0.2057        | 0.147         | -1.399       | 0.1618                             | 0.523687                                           |
| Dd         | SHOAL        | ABLAT        | Dd         | SHOAL        | CTR        | -0.0078        | 0.118         | -0.066       | 0.9477                             | 0.9683302                                          |
| Dd         | EMPTY        | ABLAT        | Dd         | SHOAL        | ABLAT      | -0.0096        | 0.138         | -0.069       | 0.9448                             | 0.9683302                                          |
| DL         | EMPTY        | CTR          | DL         | SHOAL        | CTR        | -0.096         | 0.0948        | -1.013       | 0.311                              | 0.7052                                             |
| DL         | EMPTY        | ABLAT        | DL         | EMPTY        | CTR        | -0.1449        | 0.1067        | -1.359       | 0.1743                             | 0.523687                                           |
| DL         | SHOAL        | ABLAT        | DL         | SHOAL        | CTR        | -0.1496        | 0.0831        | -1.8         | 0.0718                             | 0.4084                                             |
| DL         | EMPTY        | ABLAT        | DL         | SHOAL        | ABLAT      | -0.1007        | 0.0964        | -1.044       | 0.2964                             | 0.7025778                                          |
| DM         | EMPTY        | CTR          | DM         | SHOAL        | CTR        | -0.0206        | 0.118         | -0.174       | 0.8617                             | 0.9347254                                          |
| DM         | EMPTY        | ABLAT        | DM         | EMPTY        | CTR        | -0.0238        | 0.135         | -0.177       | 0.8598                             | 0.9347254                                          |
| DM         | SHOAL        | ABLAT        | DM         | SHOAL        | CTR        | -0.1401        | 0.105         | -1.332       | 0.1827                             | 0.523687                                           |
| DM         | EMPTY        | ABLAT        | DM         | SHOAL        | ABLAT      | -0.1369        | 0.124         | -1.107       | 0.2683                             | 0.6604308                                          |
| <b>PPA</b> | <b>EMPTY</b> | <b>CTR</b>   | <b>PPA</b> | <b>SHOAL</b> | <b>CTR</b> | <b>-0.2858</b> | <b>0.0899</b> | <b>-3.18</b> | <b>0.0015</b>                      | <b>0.024</b>                                       |
| <b>PPA</b> | <b>EMPTY</b> | <b>ABLAT</b> | <b>PPA</b> | <b>EMPTY</b> | <b>CTR</b> | <b>0.3415</b>  | <b>0.1018</b> | <b>3.356</b> | <b>0.0008</b>                      | <b>0.024</b>                                       |
| PPA        | SHOAL        | ABLAT        | PPA        | SHOAL        | CTR        | 0.017          | 0.0793        | 0.215        | 0.83                               | 0.9347254                                          |
| PPA        | EMPTY        | ABLAT        | PPA        | SHOAL        | ABLAT      | 0.0387         | 0.0926        | 0.418        | 0.6761                             | 0.8830694                                          |
| PPp        | EMPTY        | CTR          | PPp        | SHOAL        | CTR        | -0.2579        | 0.116         | -2.229       | 0.0258                             | 0.2638222                                          |
| PPp        | EMPTY        | ABLAT        | PPp        | EMPTY        | CTR        | -0.1959        | 0.129         | -1.521       | 0.1284                             | 0.4833882                                          |
| PPp        | SHOAL        | ABLAT        | PPp        | SHOAL        | CTR        | -0.0306        | 0.103         | -0.297       | 0.7663                             | 0.9082074                                          |
| PPp        | EMPTY        | ABLAT        | PPp        | SHOAL        | ABLAT      | -0.0926        | 0.117         | -0.789       | 0.4302                             | 0.795241                                           |
| VC_a       | EMPTY        | CTR          | VC_a       | SHOAL        | CTR        | 0.0668         | 0.141         | 0.474        | 0.6358                             | 0.8830694                                          |
| VC_a       | EMPTY        | ABLAT        | VC_a       | EMPTY        | CTR        | -0.3189        | 0.153         | -2.085       | 0.0371                             | 0.2638222                                          |
| VC_a       | SHOAL        | ABLAT        | VC_a       | SHOAL        | CTR        | -0.2749        | 0.132         | -2.085       | 0.0371                             | 0.2638222                                          |
| VC_a       | EMPTY        | ABLAT        | VC_a       | SHOAL        | ABLAT      | 0.1107         | 0.144         | 0.767        | 0.4433                             | 0.795241                                           |
| VC_p       | EMPTY        | CTR          | VC_p       | SHOAL        | CTR        | -0.0203        | 0.133         | -0.153       | 0.8786                             | 0.9371733                                          |
| VC_p       | EMPTY        | ABLAT        | VC_p       | EMPTY        | CTR        | -0.1035        | 0.146         | -0.708       | 0.4789                             | 0.795241                                           |
| VC_p       | SHOAL        | ABLAT        | VC_p       | SHOAL        | CTR        | -0.0401        | 0.116         | -0.347       | 0.7285                             | 0.9082074                                          |
| VC_p       | EMPTY        | ABLAT        | VC_p       | SHOAL        | ABLAT      | 0.0431         | 0.131         | 0.33         | 0.7417                             | 0.9082074                                          |
| VD_a       | EMPTY        | CTR          | VD_a       | SHOAL        | CTR        | -0.2073        | 0.161         | -1.287       | 0.1981                             | 0.5282667                                          |
| VD_a       | EMPTY        | ABLAT        | VD_a       | EMPTY        | CTR        | -0.1121        | 0.17          | -0.659       | 0.5102                             | 0.81632                                            |
| VD_a       | SHOAL        | ABLAT        | VD_a       | SHOAL        | CTR        | 0.0089         | 0.152         | 0.059        | 0.9532                             | 0.9683302                                          |
| VD_a       | EMPTY        | ABLAT        | VD_a       | SHOAL        | ABLAT      | -0.0862        | 0.162         | -0.533       | 0.5942                             | 0.8830694                                          |
| VD_m       | EMPTY        | CTR          | VD_m       | SHOAL        | CTR        | 0.0482         | 0.115         | 0.419        | 0.6749                             | 0.8830694                                          |
| VD_m       | EMPTY        | ABLAT        | VD_m       | EMPTY        | CTR        | -0.2684        | 0.125         | -2.147       | 0.0318                             | 0.2638222                                          |
| VD_m       | SHOAL        | ABLAT        | VD_m       | SHOAL        | CTR        | -0.0759        | 0.109         | -0.699       | 0.4846                             | 0.795241                                           |
| VD_m       | EMPTY        | ABLAT        | VD_m       | SHOAL        | ABLAT      | 0.2407         | 0.119         | 2.016        | 0.0438                             | 0.28032                                            |
| VD_p       | EMPTY        | CTR          | VD_p       | SHOAL        | CTR        | 0.112          | 0.114         | 0.985        | 0.3247                             | 0.7052                                             |
| VD_p       | EMPTY        | ABLAT        | VD_p       | EMPTY        | CTR        | -0.169         | 0.125         | -1.355       | 0.1754                             | 0.523687                                           |
| VD_p       | SHOAL        | ABLAT        | VD_p       | SHOAL        | CTR        | -0.173         | 0.104         | -1.661       | 0.0968                             | 0.4084                                             |
| VD_p       | EMPTY        | ABLAT        | VD_p       | SHOAL        | ABLAT      | 0.108          | 0.116         | 0.932        | 0.3513                             | 0.7052                                             |
| VL         | EMPTY        | CTR          | VL         | SHOAL        | CTR        | 0.00959        | 0.328         | 0.029        | 0.9767                             | 0.9767                                             |
| VL         | EMPTY        | ABLAT        | VL         | EMPTY        | CTR        | 0.06954        | 0.365         | 0.19         | 0.8491                             | 0.9347254                                          |

bioRxiv preprint doi: <https://doi.org/10.1101/2020.10.08.330992>; this version posted October 8, 2020. The copyright holder for this preprint (which was not certified by peer review) is the author/funder, who has granted bioRxiv a license to display the preprint in perpetuity. It is made available under aCC-BY-NC-ND 4.0 International license.

| VL          | SHOAL        | ABLAT        | VL          | SHOAL        | CTR        | 0.17089        | 0.309        | 0.455         | 0.6489        | 0.8830694    |
|-------------|--------------|--------------|-------------|--------------|------------|----------------|--------------|---------------|---------------|--------------|
| VL          | EMPTY        | ABLAT        | VL          | SHOAL        | ABLAT      | 0.08094        | 0.349        | 0.232         | 0.8165        | 0.9347254    |
| VM          | EMPTY        | CTR          | VM          | SHOAL        | CTR        | -0.3257        | 0.265        | -1.231        | 0.2184        | 0.559104     |
| VM          | EMPTY        | ABLAT        | VM          | EMPTY        | CTR        | 0.1426         | 0.299        | 0.476         | 0.6339        | 0.8830694    |
| VM          | SHOAL        | ABLAT        | VM          | SHOAL        | CTR        | 0.3621         | 0.248        | 1.461         | 0.144         | 0.512        |
| VM          | EMPTY        | ABLAT        | VM          | SHOAL        | ABLAT      | -0.1062        | 0.285        | -0.373        | 0.7089        | 0.907392     |
| VP          | EMPTY        | CTR          | VP          | SHOAL        | CTR        | -0.2041        | 0.123        | -1.663        | 0.0963        | 0.4084       |
| VP          | EMPTY        | ABLAT        | VP          | EMPTY        | CTR        | -0.1158        | 0.145        | -0.8          | 0.4234        | 0.795241     |
| VP          | SHOAL        | ABLAT        | VP          | SHOAL        | CTR        | 0.1484         | 0.113        | 1.316         | 0.1882        | 0.523687     |
| VP          | EMPTY        | ABLAT        | VP          | SHOAL        | ABLAT      | 0.06           | 0.135        | 0.446         | 0.6559        | 0.8830694    |
| VS          | EMPTY        | CTR          | VS          | SHOAL        | CTR        | -0.3116        | 0.117        | -2.664        | <b>0.0077</b> | 0.09856      |
| VS          | EMPTY        | ABLAT        | VS          | EMPTY        | CTR        | -0.1251        | 0.133        | -0.938        | 0.3483        | 0.7052       |
| VS          | SHOAL        | ABLAT        | VS          | SHOAL        | CTR        | 0.0968         | 0.104        | 0.93          | 0.3526        | 0.7052       |
| VS          | EMPTY        | ABLAT        | VS          | SHOAL        | ABLAT      | -0.0897        | 0.122        | -0.734        | 0.4628        | 0.795241     |
| <b>VV_a</b> | <b>EMPTY</b> | <b>CTR</b>   | <b>VV_a</b> | <b>SHOAL</b> | <b>CTR</b> | <b>0.6076</b>  | <b>0.19</b>  | <b>3.193</b>  | <b>0.0014</b> | <b>0.024</b> |
| VV_a        | EMPTY        | ABLAT        | VV_a        | EMPTY        | CTR        | 0.0626         | 0.205        | 0.305         | 0.7606        | 0.9082074    |
| <b>VV_a</b> | <b>SHOAL</b> | <b>ABLAT</b> | <b>VV_a</b> | <b>SHOAL</b> | <b>CTR</b> | <b>-0.6333</b> | <b>0.181</b> | <b>-3.504</b> | <b>0.0005</b> | <b>0.024</b> |
| VV_a        | EMPTY        | ABLAT        | VV_a        | SHOAL        | ABLAT      | -0.0883        | 0.197        | -0.449        | 0.6537        | 0.8830694    |
| VV_p        | EMPTY        | CTR          | VV_p        | SHOAL        | CTR        | 0.0579         | 0.114        | 0.509         | 0.611         | 0.8830694    |
| VV_p        | EMPTY        | ABLAT        | VV_p        | EMPTY        | CTR        | -0.2034        | 0.124        | -1.635        | 0.1021        | 0.4084       |
| VV_p        | SHOAL        | ABLAT        | VV_p        | SHOAL        | CTR        | -0.1748        | 0.104        | -1.687        | 0.0915        | 0.4084       |
| VV_p        | EMPTY        | ABLAT        | VV_p        | SHOAL        | ABLAT      | 0.0865         | 0.115        | 0.751         | 0.4529        | 0.795241     |

*BA1*, Brain area 1; *BA2*, Brain area 2; *Stim*, stimulus; *Treat*, Treatment; *estim*, estimate; *indep.*, independent, *GLMM*, Generalized Linear Mixed Models; *fdr*, false discovery rate, *CTR*, untreated fish; *ABL*, early MTZ-treated fish; *Vv\_a*, anterior part of the ventral nucleus of the ventral telencephalic area (V); *Vv\_p*, posterior part of the ventral nucleus of the ventral telencephalic area (V); *Vd\_a*, anterior part of the dorsal nucleus of V; *Vd\_m*, medial part of the dorsal nucleus of V; *Vd\_p*, posterior part of the dorsal nucleus of V; *Vc\_a*, anterior part of the central nucleus of V; *Vc\_p*, posterior part of the central nucleus of V; *Dm*, medial zone of the dorsal telencephalic area (D); *DI*, lateral zone of the dorsal telencephalic area (D); *Dd*, dorsal zone of the dorsal telencephalic area (D); *Vs*, supracommissural nucleus of V; *Vp*, postcommissural nucleus of V; *Ppa*, anterior part of the parvocellular preoptic nucleus; *Ppp*, posterior part of the parvocellular preoptic nucleus; *VM*, ventromedial thalamic nucleus; *VL*, ventrolateral thalamic nucleus.



**Table S6. Rank of node strength centralities of adult treated vs untreated zebrafish exposed to a conspecific shoal or to empty compartments.**

| Rank | AE   | AS   | CE   | CS   |
|------|------|------|------|------|
| 1    | DM   | VD_a | VD_p | VV_p |
| 2    | DL   | VL   | VC_p | DM   |
| 3    | VS   | VV_a | VV_a | Dd   |
| 4    | VP   | VM   | VV_p | PPA  |
| 5    | VV_p | VV_p | Dd   | VD_p |
| 6    | VD_m | VP   | VD_a | VC_p |
| 7    | VL   | VD_m | VC_a | VC_a |
| 8    | Dd   | VS   | VD_m | VS   |
| 9    | PPp  | VC_p | PPp  | VP   |
| 10   | VD_p | VD_p | VL   | DL   |
| 11   | VM   | PPA  | VM   | VV_a |
| 12   | VC_p | PPp  | DL   | VD_m |
| 13   | VC_a | DL   | DM   | VM   |
| 14   | VD_a | VC_a | VP   | VD_a |
| 15   | VV_a | Dd   | PPA  | PPp  |
| 16   | PPA  | DM   | VS   | VL   |

*AE*, early-MTZ treated fish exposed to empty compartment; *AS*, early MTZ-treated fish exposed to shoal; *CE*, untreated fish exposed to empty compartment; *CS*, untreated fish exposed to shoal; *Vv\_a*, anterior part of the ventral nucleus of the ventral telencephalic area (V); *Vv\_p*, posterior part of the ventral nucleus of the ventral telencephalic area (V); *Vd\_a*, anterior part of the dorsal nucleus of V; *Vd\_m*, medial part of the dorsal nucleus of V; *Vd\_p*, posterior part of the dorsal nucleus of V; *Vc\_a*, anterior part of the central nucleus of V; *Vc\_p*, posterior part of the central nucleus of V; *Dm*, medial zone of the dorsal telencephalic area (D); *DL*, lateral zone of the dorsal telencephalic area (D); *Dd*, dorsal zone of the dorsal telencephalic area (D); *Vs*, supracommissural nucleus of V; *Vp*, postcommissural nucleus of V; *Ppa*, anterior part of the parvocellular preoptic nucleus; *Ppp*, posterior part of the parvocellular preoptic nucleus; *VM*, ventromedial thalamic nucleus; *VL*, ventrolateral thalamic nucleus;
